# Supplementary material for: Comprehensive Molecular Analysis of Disease-Related Genes as First-Tier Test for Early Diagnosis, Classification, and Management of Patients Affected by Nonsyndromic Ichthyosis
Source: MDPI journal article supplement (doi:10.3390/biomedicines12051112), 2024-05-17
Supplement: s1 [file s1]

Table S2. Overall number of rare variants identified in the ichthyosis-related genes of 300 unaffected individuals

| Subject ID | GENE    | GenBank #      | Nucleotide variant | gene position | Exon | Presumed effect | Presumed protein variant | gnomAD frequency  | ACMG prediction | OMIM identification                                                                                                                             |
|------------|---------|----------------|--------------------|---------------|------|-----------------|--------------------------|-------------------|-----------------|-------------------------------------------------------------------------------------------------------------------------------------------------|
| 106        | ABCA12  | NM_173076.3    | c.300T>G           | exonic        | 3    | nonsynonymous   | p.Asp100Glu              | 6/276566=0        | VOUS            | # 242500<br>ICHTHYOSIS, CONGENITAL, AUTOSOMAL<br>RECESSIVE 4B; ARCI4B                                                                           |
| 74         | ABCA12  | NM_173076.3    | c.346G>T           | exonic        | 4    | nonsynonymous   | p.Asp116Tyr              | 7/245398=0        | VOUS            |                                                                                                                                                 |
| 108        | ABCA12  | NM_173076.3    | c.485C>T           | exonic        | 5    | nonsynonymous   | p.Ala162Val              | 384/276512=0.001  | VOUS            |                                                                                                                                                 |
| 146        | ABCA12  | NM_173076.3    | c.485C>T           | exonic        | 5    | nonsynonymous   | p.Ala162Val              | 384/276512=0.001  | VOUS            |                                                                                                                                                 |
| 188        | ABCA12  | NM_173076.3    | c.485C>T           | exonic        | 5    | nonsynonymous   | p.Ala162Val              | 384/276512=0.001  | VOUS            |                                                                                                                                                 |
| 191        | ABCA12  | NM_173076.3    | c.501G>C           | exonic        | 5    | nonsynonymous   | p.Leu167Phe              |                   | VOUS            |                                                                                                                                                 |
| 195        | ABCA12  | NM_173076.3    | c.485C>T           | exonic        | 5    | nonsynonymous   | p.Ala162Val              | 384/276512=0.001  | VOUS            |                                                                                                                                                 |
| 184        | ABCA12  | NM_173076.3    | c.539T>C           | exonic        | 6    | nonsynonymous   | p.Ile180Thr              | 3/245112=0        | VOUS            |                                                                                                                                                 |
| 200        | ABCA12  | NM_173076.3    | c.1141G>C          | exonic        | 10   | nonsynonymous   | p.Val381Leup.V381L       | 239/277242=0.001  | LB              |                                                                                                                                                 |
| 89         | ABCA12  | NM_173076.3    | c.1222T>C          | exonic        | 11   | nonsynonymous   | p.Ser408Pro              | 322/276876=0.001  | B               |                                                                                                                                                 |
| 77         | ABCA12  | NM_173076.3    | c.1222T>C          | exonic        | 11   | nonsynonymous   | p.Ser408Pro              | 322/276876=0.001  | B               |                                                                                                                                                 |
| 89         | ABCA12  | NM_173076.3    | c.1475A>G          | exonic        | 12   | nonsynonymous   | p.Asn492Ser              | 5/276916=0        | VOUS            |                                                                                                                                                 |
| 141        | ABCA12  | NM_173076.3    | c.1446A>C          | exonic        | 12   | nonsynonymous   | p.Glu482Asp              | 29/276918=0       | VOUS            |                                                                                                                                                 |
| 114        | ABCA12  | NM_173076.3    | c.1743C>G          | exonic        | 14   | nonsynonymous   | p.Asp581Glu              | 246/277138=0.001  | LB              |                                                                                                                                                 |
| 15         | ABCA12  | NM_173076.3    | c.1816G>A          | exonic        | 15   | nonsynonymous   | p.Asp606Asn              | 2/245978=0        | VOUS            |                                                                                                                                                 |
| 7          | ABCA12  | NM_173076.3    | c.2129A>G          | exonic        | 17   | nonsynonymous   | p.Tyr710Cys              | 1/246028=0        | VOUS            |                                                                                                                                                 |
| 14         | ABCA12  | NM_173076.3    | c.2243G>A          | exonic        | 17   | nonsynonymous   | p.Arg748Lys              | 6/245968=0        | VOUS            |                                                                                                                                                 |
| 5          | ABCA12  | NM_173076.3    | c.3098T>C          | exonic        | 22   | nonsynonymous   | p.Ile1033Thr             | 2/245894=0        | VOUS            |                                                                                                                                                 |
| 55         | ABCA12  | NM_173076.3    | c.3481A>T          | exonic        | 24   | nonsynonymous   | p.Met1161Leu             | 363/277160=0.001  | LB              |                                                                                                                                                 |
| 62         | ABCA12  | NM_173076.3    | c.3481A>T          | exonic        | 24   | nonsynonymous   | p.Met1161Leu             | 363/277160=0.001  | LB              |                                                                                                                                                 |
| 54         | ABCA12  | NM_173076.3    | c.3481A>T          | exonic        | 24   | nonsynonymous   | p.Met1161Leu             | 363/277160=0.001  | LB              |                                                                                                                                                 |
| 49         | ABCA12  | NM_173076.3    | c.4618G>T          | exonic        | 31   | nonsynonymous   | p.Ala1540Ser             | 9/245910=0        | VOUS            |                                                                                                                                                 |
| 41         | ABCA12  | NM_173076.3    | c.5051T>C          | exonic        | 33   | nonsynonymous   | p.Ile1684Thr             | 4/245586=0        | VOUS            |                                                                                                                                                 |
| 36         | ABCA12  | NM_173076.3    | c.5617G>A          | exonic        | 37   | nonsynonymous   | p.Val1873Ile             | 670/276578=0.002  | LB              |                                                                                                                                                 |
| 29         | ABCA12  | NM_173076.3    | c.6208G>A          | exonic        | 42   | nonsynonymous   | p.Val2070Ile             | 514/276952=0.002  | B               |                                                                                                                                                 |
| 172        | ABCA12  | NM_173076.3    | c.6704A>C          | exonic        | 45   | nonsynonymous   | p.Glu2235Ala             | 184/277156=0.001  | B               |                                                                                                                                                 |
| 158        | ABCA12  | NM_173076.3    | c.6919A>G          | exonic        | 46   | nonsynonymous   | p.Ile2307Val             | 486/277078=0.002  | LB              |                                                                                                                                                 |
| 168        | ABCA12  | NM_173076.3    | c.6919A>G          | exonic        | 46   | nonsynonymous   | p.Ile2307Val             | 486/277078=0.002  | LB              |                                                                                                                                                 |
| 160        | ABCA12  | NM_173076.3    | c.6919A>G          | exonic        | 46   | nonsynonymous   | p.Ile2307Val             | 486/277078=0.002  | LB              |                                                                                                                                                 |
| 161        | ABCA12  | NM_173076.3    | c.6919A>G          | exonic        | 46   | nonsynonymous   | p.Ile2307Val             | 486/277078=0.002  | LB              |                                                                                                                                                 |
| 65         | ABCA12  | NM_173076.3    | c.7631C>T          | exonic        | 52   | nonsynonymous   | p.Thr2544Ile             | 379/276596=0.001  | B               |                                                                                                                                                 |
| 74         | ABHD5   | NM_001365649.1 | c.22A>G            | exonic        | 3    | nonsynonymous   | p.Thr8Ala                | 12/237020=0       | B               | # 275630<br>CHANARIN-DORFMAN SYNDROME; CDS AR                                                                                                   |
| 66         | ABHD5   | NM_001365649.1 | c.22A>G            | exonic        | 3    | nonsynonymous   | p.Thr8Ala                | 12/237020=0       | B               |                                                                                                                                                 |
| 135        | ABHD5   | NM_001365649.1 | c.505C>G           | exonic        | 4    | nonsynonymous   | p.Pro169Ala              | 21/277218=0       | VOUS            |                                                                                                                                                 |
| 96         | ABHD5   | NM_001365649.1 | c.883G>T           | exonic        | 7    | stopgain        | p.Glu295*                | 1/121404=0        | P               |                                                                                                                                                 |
| 47         | ALDH3A2 | NM_001031806.2 | c.17G>C            | exonic        | 1    | nonsynonymous   | p.Arg6Pro                | 3/223156=0        | VOUS            | # 270200<br>SJOGREN-LARSSON SYNDROME; SLS<br><br>Alternative titles; symbols<br>ICHTHYOSIS, SPASTIC NEUROLOGIC DISORDER, AND<br>OLIGOPHRENIA AR |
| 89         | ALDH3A2 | NM_001031806.2 | c.119A>G           | exonic        | 1    | nonsynonymous   | p.Asp40Gly               | 155/218008=0.001  | LB              |                                                                                                                                                 |
| 116        | ALDH3A2 | NM_001031806.2 | c.17G>C            | exonic        | 1    | nonsynonymous   | p.Arg6Pro                | 3/223156=0        | VOUS            |                                                                                                                                                 |
| 148        | ALDH3A2 | NM_001031806.2 | c.28C>G            | exonic        | 1    | nonsynonymous   | p.Gln10Glu               | 806/218946=0.004  | B               |                                                                                                                                                 |
| 55         | ALDH3A2 | NM_001031806.2 | c.17G>C            | exonic        | 2    | nonsynonymous   | p.Arg6Pro                | 3/223156=0        | VOUS            |                                                                                                                                                 |
| 76         | ALDH3A2 | NM_001031806.2 | c.661G>A           | exonic        | 4    | nonsynonymous   | p.Asp221Asn              | 1/244348=0        | VOUS            |                                                                                                                                                 |
| 204        | ALDH3A2 | NM_001031806.1 | c.1270C>T          | exonic        | 8    | nonsynonymous   | p.Pro424Ser              | 1205/277210=0.004 | VOUS            |                                                                                                                                                 |
| 40         | ALDH3A2 | NM_001031806.2 | c.1270C>T          | exonic        | 9    | nonsynonymous   | p.Pro424Ser              | 1205/277210=0.004 | VOUS            |                                                                                                                                                 |
| 118        | ALDH3A2 | NM_001031806.2 | c.1270C>T          | exonic        | 9    | nonsynonymous   | p.Pro424Ser              | 1205/277210=0.004 | VOUS            |                                                                                                                                                 |
| 143        | ALDH3A2 | NM_001031806.2 | c.1270C>T          | exonic        | 9    | nonsynonymous   | p.Pro424Ser              | 1205/277210=0.004 | VOUS            |                                                                                                                                                 |
| 124        | ALOX12B | NM_0011139.3   | c.280G>A           | exonic        | 2    | nonsynonymous   | p.Gly94Ser               | 2588/264690       | LB              | # 242100<br>ICHTHYOSIS, CONGENITAL, AUTOSOMAL<br>RECESSIVE                                                                                      |
| 26         | ALOX12B | NM_0011139.3   | c.380C>T           | exonic        | 3    | nonsynonymous   | p.Pro127Leu              | 66/276792=0       | LB              |                                                                                                                                                 |
| 180        | ALOX12B | NM_0011139.3   | c.526G>A           | exonic        | 4    | nonsynonymous   | p.Glu176Lys              | 92/276916=0       | VOUS            |                                                                                                                                                 |
| 181        | ALOX12B | NM_0011139.3   | c.526G>A           | exonic        | 4    | nonsynonymous   | p.Glu176Lys              | 92/276916=0       | VOUS            |                                                                                                                                                 |
| 68         | ALOX12B | NM_0011139.3   | c.556A>T           | exonic        | 5    | nonsynonymous   | p.Ile186Phe              | 0                 | VOUS            |                                                                                                                                                 |
| 172        | ALOX12B | NM_0011139.3   | c.715A>G           | exonic        | 6    | nonsynonymous   | p.Ile239Val              | 24/277224=0       | VOUS            |                                                                                                                                                 |
| 80         | ALOX12B | NM_0011139.3   | c.1156C>T          | exonic        | 9    | nonsynonymous   | p.Arg386Cys              | 9/276770=0        | P               |                                                                                                                                                 |
| 158        | ALOX12B | NM_0011139.3   | c.1431delC         | exonic        | 11   | frameshift      | p.Asp477Gluufs*37        | 1/245856=0        | P               |                                                                                                                                                 |
| 93         | ALOX12B | NM_0011139.3   | c.1565C>T          | exonic        | 12   | nonsynonymous   | p.Pro522Leu              | 277/277210=0.001  | VOUS            |                                                                                                                                                 |
| 4          | ALOXE3  | NM_001165960.1 | c.62C>T            | exonic        | 1    | nonsynonymous   | p.Pro211Leu              | 16/168304=0       | VOUS            | # 606545                                                                                                                                        |
| 13         | ALOXE3  | NM_001165960.1 | c.30G>T            | exonic        | 1    | nonsynonymous   | p.Leu10Phe               |                   | VOUS            |                                                                                                                                                 |
| 45         | ALOXE3  | NM_001165960.1 | c.280C>G           | exonic        | 2    | nonsynonymous   | p.Pro94Ala               | 143/182810=0.001  | VOUS            |                                                                                                                                                 |
| 95         | ALOXE3  | NM_001165960.1 | c.809G>A           | exonic        | 4    | nonsynonymous   | p.Arg270Gln              | 7/246260=0        | VOUS            |                                                                                                                                                 |
| 138        | ALOXE3  | NM_001165960.1 | c.989T>C           | exonic        | 6    | nonsynonymous   | p.Ile330Thr              | 4/246268=0        | VOUS            |                                                                                                                                                 |
| 137        | ALOXE3  | NM_001165960.1 | c.1076C>T          | exonic        | 6    | nonsynonymous   | p.Ala359Val              | 51/246268=0       | VOUS            |                                                                                                                                                 |
| 163        | ALOXE3  | NM_001165960.1 | c.1483C>T          | exonic        | 9    | nonsynonymous   | p.Pro495Ser              |                   | VOUS            |                                                                                                                                                 |

|     |         |                |                 |        |                  |                |                   |      |                                                                                                                                                                                            |
|-----|---------|----------------|-----------------|--------|------------------|----------------|-------------------|------|--------------------------------------------------------------------------------------------------------------------------------------------------------------------------------------------|
| 175 | ALOXE3  | NM_001165960.1 | c.1454T>A       | exonic | 9 nonsynonymous  | p.Leu485Gln    |                   | LP   | ICHTHYOSIS, CONGENITAL, AUTOSOMAL RECESSIVE 3; ARCI3                                                                                                                                       |
| 180 | ALOXE3  | NM_001165960.1 | c.1843C>T       | exonic | 12 nonsynonymous | p.His615Tyr    |                   | LP   |                                                                                                                                                                                            |
| 190 | ALOXE3  | NM_001165960.1 | c.2102C>A       | exonic | 14 nonsynonymous | p.Thr701Asn    | 102/276992=0      | VOUS |                                                                                                                                                                                            |
| 190 | ALOXE3  | NM_001165960.1 | c.2404C>T       | exonic | 16 nonsynonymous | p.Arg802Trp    | 239/277182=0.001  | VOUS |                                                                                                                                                                                            |
| 193 | ALOXE3  | NM_001165960.1 | c.2510T>C       | exonic | 16 nonsynonymous | p.Ile837Thr    | 333/277202=0.001  | LB   |                                                                                                                                                                                            |
| 194 | ALOXE3  | NM_001165960.1 | c.2510T>C       | exonic | 16 nonsynonymous | p.Ile837Thr    | 333/277202=0.001  | VOUS |                                                                                                                                                                                            |
| 199 | ALOXE3  | NM_001165960.1 | c.2510T>C       | exonic | 16 nonsynonymous | p.Ile837Thr    | 333/277202=0.001  | VOUS |                                                                                                                                                                                            |
| 201 | ALOXE3  | NM_001165960.1 | c.2510T>C       | exonic | 16 nonsynonymous | p.Ile837Thr    | 333/277202=0.001  | VOUS |                                                                                                                                                                                            |
| 3   | CAST    | NM_001750.7    | c.200C>T        | exonic | 3 nonsynonymous  | p.Ser67Leu     | 12/276074=0       | VOUS | # 616295<br>PEELING SKIN WITH LEUKONYCHIA, ACRAL PUNCTATE KERATOSES, CHEILITIS, AND KNUCKLE PADS; PLACK AD                                                                                 |
| 149 | CAST    | NM_001750.7    | c.620C>T        | exonic | 9 nonsynonymous  | p.Pro207Leu    | 5/246206=0        | VOUS |                                                                                                                                                                                            |
| 98  | CAST    | NM_001750.7    | c.775A>G        | exonic | 11 nonsynonymous | p.Thr259Ala    | 943/276512=0.003  | B    |                                                                                                                                                                                            |
| 72  | CAST    | NM_001750.7    | c.986C>G        | exonic | 14 nonsynonymous | p.Ala329Gly    | 74/276982=0       | VOUS |                                                                                                                                                                                            |
| 98  | CAST    | NM_001750.7    | c.925A>C        | exonic | 14 nonsynonymous | p.Ile309Leu    | 2994/276670=0.011 | B    |                                                                                                                                                                                            |
| 150 | CAST    | NM_001750.7    | c.1177C>T       | exonic | 16 nonsynonymous | p.Arg393Cys    | 34/276754=0       | LB   |                                                                                                                                                                                            |
| 9   | CAST    | NM_001750.7    | c.1207G>C       | exonic | 17 nonsynonymous | p.Ala403Pro    | 1334/276854=0.005 | B    |                                                                                                                                                                                            |
| 194 | CAST    | NM_001750.7    | c.1283C>T       | exonic | 17 nonsynonymous | p.Thr428Met    | 909/277064=0.003  | B    |                                                                                                                                                                                            |
| 12  | CAST    | NM_001750.7    | c.1835A>G       | exonic | 25 nonsynonymous | p.Lys612Arg    | 585/265502=0.002  | B    |                                                                                                                                                                                            |
| 45  | CAST    | NM_001750.7    | c.1835A>G       | exonic | 25 nonsynonymous | p.Lys612Arg    | 585/265502=0.002  | B    |                                                                                                                                                                                            |
| 16  | CDSN    | NM_001264.4    | c.32G>A         | exonic | 1 nonsynonymous  | p.Arg11His     | 790/239488=0.003  | B    | # 146520<br>HYPOTRICHOSIS 2; HYPT2 AD # 270300<br>PEELING SKIN SYNDROME 1; PSS1 AR                                                                                                         |
| 98  | CDSN    | NM_001264.4    | c.32G>A         | exonic | 1 nonsynonymous  | p.Arg11His     | 790/239488=0.003  | B    |                                                                                                                                                                                            |
| 37  | CDSN    | NM_001264.4    | c.475A>G        | exonic | 2 nonsynonymous  | p.Ser159Gly    | 47/276174=0       | VOUS |                                                                                                                                                                                            |
| 60  | CDSN    | NM_001264.4    | c.475A>G        | exonic | 2 nonsynonymous  | p.Ser159Gly    | 47/276174=0       | VOUS |                                                                                                                                                                                            |
| 77  | CDSN    | NM_001264.4    | c.1302C>A       | exonic | 2 nonsynonymous  | p.Ser434Arg    | 916/276996=0.003  | B    |                                                                                                                                                                                            |
| 127 | CDSN    | NM_001264.4    | c.782G>T        | exonic | 2 nonsynonymous  | p.Gly261Val    |                   | VOUS |                                                                                                                                                                                            |
| 4   | CERS3   | NM_001290341.2 | c.233C>T        | exonic | 6 nonsynonymous  | p.Ser78Leu     |                   | VOUS | # 615023<br>ICHTHYOSIS, CONGENITAL, AUTOSOMAL RECESSIVE 9; ARCI9                                                                                                                           |
| 72  | CERS3   | NM_001290341.2 | c.914A>G        | exonic | 13 nonsynonymous | p.His305Arg    | 3292/264968=0.012 | VOUS |                                                                                                                                                                                            |
| 86  | CERS3   | NM_001290341.2 | c.914A>G        | exonic | 13 nonsynonymous | p.His305Arg    | 3292/264968=0.012 | VOUS |                                                                                                                                                                                            |
| 193 | CERS3   | NM_001290341.2 | c.914A>G        | exonic | 13 nonsynonymous | p.His305Arg    | 3292/264968=0.012 | B    |                                                                                                                                                                                            |
| 23  | CERS3   | NM_001290341.2 | c.1151G>A       | exonic | 14 nonsynonymous | p.Arg384Lys    | 481/277162=0.002  | B    |                                                                                                                                                                                            |
| 181 | CLDN1   | NM_021101.5    | c.136A>T        | exonic | 1 nonsynonymous  | p.Met46Leu     | 15/246242=0       | VOUS | # 607626<br>ICHTHYOSIS, LEUKOCYTE VACUOLES, ALPECIA, AND SCLEROSING CHOLANGITIS; ILVASC AR                                                                                                 |
| 182 | CLDN1   | NM_021101.5    | c.136A>T        | exonic | 1 nonsynonymous  | p.Met46Leu     | 15/246242=0       | VOUS |                                                                                                                                                                                            |
| 144 | CLDN1   | NM_021101.5    | c.278T>C        | exonic | 2 nonsynonymous  | p.Ile93Thr     |                   | VOUS |                                                                                                                                                                                            |
| 31  | CLDN1   | NM_021101.5    | c.631G>A        | exonic | 4 nonsynonymous  | p.Val211Met    | 30/277152=0       | VOUS |                                                                                                                                                                                            |
| 81  | CYP4F22 | NM_173483.4    | c.109C>T        | exonic | 3 nonsynonymous  | p.Arg37Cys     | 32/121338=0       | VOUS | # 604777<br>ICHTHYOSIS, CONGENITAL, AUTOSOMAL RECESSIVE 5; ARCI5<br><br>Alternative titles; symbols<br>ICHTHYOSIS, NONLAMELLAR AND NONERYTHRODERMIC, CONGENITAL, AUTOSOMAL RECESSIVE; NNCI |
| 94  | CYP4F22 | NM_173483.4    | c.68C>T         | exonic | 3 nonsynonymous  | p.Ala23Val     | 45/277126=0       | VOUS |                                                                                                                                                                                            |
| 52  | CYP4F22 | NM_173483.4    | c.485C>G        | exonic | 6 nonsynonymous  | p.Ala162Gly    | 47/277122=0       | VOUS |                                                                                                                                                                                            |
| 190 | CYP4F22 | NM_173483.4    | c.463C>T        | exonic | 6 nonsynonymous  | p.His155Tyr    | 121/277112=0      | VOUS |                                                                                                                                                                                            |
| 194 | CYP4F22 | NM_173483.4    | c.463C>T        | exonic | 6 nonsynonymous  | p.His155Tyr    | 121/277112=0      | VOUS |                                                                                                                                                                                            |
| 148 | CYP4F22 | NM_173483.4    | c.665G>T        | exonic | 7 nonsynonymous  | p.Cys222Phe    |                   | VOUS |                                                                                                                                                                                            |
| 64  | CYP4F22 | NM_173483.4    | c.712G>A        | exonic | 8 nonsynonymous  | p.Ala238Thr    |                   | LB   |                                                                                                                                                                                            |
| 199 | CYP4F22 | NM_173483.4    | c.851G>A        | exonic | 8 nonsynonymous  | p.Arg284Gln    | 9/276864=0        | VOUS |                                                                                                                                                                                            |
| 59  | CYP4F22 | NM_173483.4    | c.1148C>T       | exonic | 11 nonsynonymous | p.Thr383Ile    |                   | VOUS |                                                                                                                                                                                            |
| 67  | ELOVL4  | NM_022726.4    | c.243C>G        | exonic | 2 nonsynonymous  | p.Ile81Met     |                   | VOUS | # 614457<br>ICHTHYOSIS, SPASTIC QUADRIPLEGIA, AND IMPAIRED INTELLECTUAL DEVELOPMENT; ISQMR                                                                                                 |
| 61  | ELOVL4  | NM_022726.4    | c.800T>C        | exonic | 6 nonsynonymous  | p.Ile267Thr    | 2004/276984=0.007 | LB   |                                                                                                                                                                                            |
| 127 | ELOVL4  | NM_022726.4    | c.800T>C        | exonic | 6 nonsynonymous  | p.Ile267Thr    | 2004/276984=0.007 | LB   |                                                                                                                                                                                            |
| 172 | ELOVL4  | NM_022726.4    | c.800T>C        | exonic | 6 nonsynonymous  | p.Ile267Thr    | 2004/276984=0.007 | LB   |                                                                                                                                                                                            |
| 204 | ELOVL4  | NM_022726.4    | c.814G>C        | exonic | 6 nonsynonymous  | p.Glu272Gln    | 2735/277052=0.01  | LB   |                                                                                                                                                                                            |
| 25  | GJA1    | NM_000165.5    | c.1108C>T       | exonic | 2 nonsynonymous  | p.Arg370Cys    | 3/245356=0        | VOUS |                                                                                                                                                                                            |
| 32  | GJA1    | NM_000165.5    | c.1109G>A       | exonic | 2 nonsynonymous  | p.Arg370His    | 1/245340=0        | VOUS |                                                                                                                                                                                            |
| 156 | GJA1    | NM_000165.5    | c.157C>T        | exonic | 2 nonsynonymous  | p.Arg53Cys     | 2/246262=0        | LP   |                                                                                                                                                                                            |
| 63  | GJA1    | NM_000165.5    | c.758C>T        | exonic | 2 nonsynonymous  | p.Ala253Val    | 2227/277148=0.008 | LB   |                                                                                                                                                                                            |
| 141 | GJA1    | NM_000165.5    | c.758C>T        | exonic | 2 nonsynonymous  | p.Ala253Val    | 2227/277148=0.008 | LB   |                                                                                                                                                                                            |
| 156 | GJA1    | NM_000165.5    | c.758C>T        | exonic | 2 nonsynonymous  | p.Ala253Val    | 2227/277148=0.008 | LB   |                                                                                                                                                                                            |
| 171 | GJA1    | NM_000165.5    | c.758C>T        | exonic | 2 nonsynonymous  | p.Ala253Val    | 2227/277148=0.008 | LB   |                                                                                                                                                                                            |
| 154 | GJB2    | NM_004004.6    | c.296G>A        | exonic | 2 nonsynonymous  | p.Arg99Lys     |                   | VOUS |                                                                                                                                                                                            |
| 145 | GJB2    | NM_004004.6    | c.358_360delGAG | exonic | 2 inframe        | p.Glu120del    | 20/275990=0       | P    |                                                                                                                                                                                            |
| 166 | GJB2    | NM_004004.6    | c.358_360delGAG | exonic | 2 inframe        | p.Glu120del    | 20/275990=0       | P    |                                                                                                                                                                                            |
| 6   | GJB2    | NM_004004.6    | c.35delG        | exonic | 2 frameshift     | p.Gly12Valfs*2 | 1721/275002=0.006 | P    |                                                                                                                                                                                            |
| 35  | GJB2    | NM_004004.6    | c.35delG        | exonic | 2 frameshift     | p.Gly12Valfs*2 | 1721/275002=0.006 | P    |                                                                                                                                                                                            |
| 71  | GJB2    | NM_004004.6    | c.35delG        | exonic | 2 frameshift     | p.Gly12Valfs*2 | 1721/275002=0.006 | P    |                                                                                                                                                                                            |
| 84  | GJB2    | NM_004004.6    | c.35delG        | exonic | 2 frameshift     | p.Gly12Valfs*2 | 1721/275002=0.006 | P    |                                                                                                                                                                                            |
| 103 | GJB2    | NM_004004.6    | c.35delG        | exonic | 2 frameshift     | p.Gly12Valfs*2 | 1721/275002=0.006 | P    |                                                                                                                                                                                            |
| 117 | GJB2    | NM_004004.6    | c.35delG        | exonic | 2 frameshift     | p.Gly12Valfs*2 | 1721/275002=0.006 | P    |                                                                                                                                                                                            |
| 151 | GJB2    | NM_004004.6    | c.35delG        | exonic | 2 frameshift     | p.Gly12Valfs*2 | 1721/275002=0.006 | P    |                                                                                                                                                                                            |

|     |       |                |                                  |          |   |               |                    |                   |      |                                                                                                                      |
|-----|-------|----------------|----------------------------------|----------|---|---------------|--------------------|-------------------|------|----------------------------------------------------------------------------------------------------------------------|
| 185 | GJB2  | NM_004004.6    | c.35delG                         | exonic   | 2 | frameshift    | p.Gly12Valfs*2     | 1721/275002=0.006 | P    | # 148210<br>KERATITIS-ICHTHYOSIS-DEAFNESS SYNDROME,<br>AUTOSOMAL DOMINANT; KIDAD<br>AD                               |
| 198 | GJB2  | NM_004004.6    | c.35delG                         | exonic   | 2 | frameshift    | p.Gly12Valfs*2     | 1721/275002=0.006 | P    |                                                                                                                      |
| 202 | GJB2  | NM_004004.6    | c.35delG                         | exonic   | 2 | frameshift    | p.Gly12Valfs*2     | 1721/275002=0.006 | P    |                                                                                                                      |
| 204 | GJB2  | NM_004004.6    | c.35delG                         | exonic   | 2 | frameshift    | p.Gly12Valfs*2     | 1721/275002=0.006 | P    |                                                                                                                      |
| 205 | GJB2  | NM_004004.6    | c.35delG                         | exonic   | 2 | frameshift    | p.Gly12Valfs*2     | 1721/275002=0.006 | P    |                                                                                                                      |
| 8   | GJB2  | NM_004004.6    | c.88A>G                          | exonic   | 2 | nonsynonymous | p.Ile30Val         |                   | LP   |                                                                                                                      |
| 36  | GJB2  | NM_004004.6    | c.269T>C                         | exonic   | 2 | nonsynonymous | p.Leu90Pro         | 177/277032=0.001  | P    |                                                                                                                      |
| 12  | GJB2  | NM_004004.6    | c.101T>C                         | exonic   | 2 | nonsynonymous | p.Met34Thr         | 2487/276420=0.009 | P    |                                                                                                                      |
| 17  | GJB2  | NM_004004.6    | c.101T>C                         | exonic   | 2 | nonsynonymous | p.Met34Thr         | 2487/276420=0.009 | P    |                                                                                                                      |
| 70  | GJB2  | NM_004004.6    | c.101T>C                         | exonic   | 2 | nonsynonymous | p.Met34Thr         | 2487/276420=0.009 | P    |                                                                                                                      |
| 88  | GJB2  | NM_004004.6    | c.101T>C                         | exonic   | 2 | nonsynonymous | p.Met34Thr         | 2487/276420=0.009 | P    |                                                                                                                      |
| 159 | GJB2  | NM_004004.6    | c.101T>C                         | exonic   | 2 | nonsynonymous | p.Met34Thr         | 2487/276420=0.009 | P    |                                                                                                                      |
| 184 | GJB2  | NM_004004.6    | c.101T>C                         | exonic   | 2 | nonsynonymous | p.Met34Thr         | 2487/276420=0.009 | P    |                                                                                                                      |
| 129 | GJB2  | NM_004004.6    | c.23C>T                          | exonic   | 2 | nonsynonymous | p.Thr8Met          | 21/275096=0       | P    |                                                                                                                      |
| 20  | GJB2  | NM_004004.6    | c.457G>A                         | exonic   | 2 | nonsynonymous | p.Val153Ile        | 2433/276862=0.009 | B    |                                                                                                                      |
| 42  | GJB2  | NM_004004.6    | c.457G>A                         | exonic   | 2 | nonsynonymous | p.Val153Ile        | 2433/276862=0.009 | B    |                                                                                                                      |
| 77  | GJB2  | NM_004004.6    | c.457G>A                         | exonic   | 2 | nonsynonymous | p.Val153Ile        | 2433/276862=0.009 | B    |                                                                                                                      |
| 79  | GJB2  | NM_004004.6    | c.457G>A                         | exonic   | 2 | nonsynonymous | p.Val153Ile        | 2433/276862=0.009 | B    |                                                                                                                      |
| 140 | GJB2  | NM_004004.6    | c.457G>A                         | exonic   | 2 | nonsynonymous | p.Val153Ile        | 2433/276862=0.009 | B    |                                                                                                                      |
| 153 | GJB2  | NM_004004.6    | c.467T>A                         | exonic   | 2 | nonsynonymous | p.Val156Asp        |                   | VOUS |                                                                                                                      |
| 22  | GJB2  | NM_004004.6    | c.109G>A                         | exonic   | 2 | nonsynonymous | p.Val37Ile         | 2011/276450=0.007 | P    |                                                                                                                      |
| 54  | GJB3  | NM_024009.3    | c.196_198delGAC                  | exonic   | 2 | inframe       | p.Asp66del         | 38/277154=0       | VOUS | # 133200<br>ERYTHROKERATODERMIA VARIABILIS ET<br>PROGRESSIVA 1; EKVPI<br>AD                                          |
| 119 | GJB3  | NM_024009.3    | c.196_198delGAC                  | exonic   | 2 | inframe       | p.Asp66del         | 38/277154=0       | VOUS |                                                                                                                      |
| 150 | GJB3  | NM_024009.3    | c.293G>A                         | exonic   | 2 | nonsynonymous | p.Arg98His         | 23/276870=0       | VOUS |                                                                                                                      |
| 166 | GJB3  | NM_024009.3    | c.293G>A                         | exonic   | 2 | nonsynonymous | p.Arg98His         | 23/276870=0       | VOUS |                                                                                                                      |
| 24  | GJB3  | NM_024009.3    | c.316C>T                         | exonic   | 2 | nonsynonymous | p.Arg106Cys        | 40/276618=0       | VOUS |                                                                                                                      |
| 7   | GJB3  | NM_024009.3    | c.422T>C                         | exonic   | 2 | nonsynonymous | p.Ile141Thr        |                   | VOUS |                                                                                                                      |
| 9   | GJB3  | NM_024009.3    | c.529T>G                         | exonic   | 2 | nonsynonymous | p.Tyr177Asp        | 525/276788=0.002  | LB   |                                                                                                                      |
| 196 | GJB3  | NM_024009.3    | c.659A>T                         | exonic   | 2 | nonsynonymous | p.Lys220Met        | 1/246042=0        | VOUS |                                                                                                                      |
| 168 | GJB3  | NM_024009.3    | c.670C>T                         | exonic   | 2 | stopgain      | p.Arg224*          | 11/276538=0       | P    |                                                                                                                      |
| 3   | GJB4  | NM_153212.3    | c.119C>T                         | exonic   | 2 | nonsynonymous | p.Ala40Val         | 13/277082=0       | VOUS | # 617524<br>ERYTHROKERATODERMIA VARIABILIS ET<br>PROGRESSIVA 2; AD                                                   |
| 46  | GJB4  | NM_153212.3    | c.478C>T                         | exonic   | 2 | nonsynonymous | p.Arg160Cys        | 20/276732=0       | VOUS |                                                                                                                      |
| 180 | GJB4  | NM_153212.3    | c.314A>G                         | exonic   | 2 | nonsynonymous | p.His105Arg        | 10/277130=0       | VOUS |                                                                                                                      |
| 101 | GJB4  | NM_153212.3    | c.153delIT                       | exonic   | 2 | frameshift    | p.Phe51Leufs*57    | 1464/276392=0.005 | P    |                                                                                                                      |
| 137 | GJB4  | NM_153212.3    | c.153delIT                       | exonic   | 2 | frameshift    | p.Phe51Leufs*57    | 1464/276392=0.005 | P    |                                                                                                                      |
| 160 | GJB4  | NM_153212.3    | c.153delIT                       | exonic   | 2 | frameshift    | p.Phe51Leufs*57    | 1464/276392=0.005 | P    |                                                                                                                      |
| 34  | GJB4  | NM_153212.3    | c.770C>T                         | exonic   | 2 | nonsynonymous | p.Ser257Leu        | 20/275366=0       | VOUS |                                                                                                                      |
| 201 | GJB4  | NM_153212.3    | c.389C>T                         | exonic   | 2 | nonsynonymous | p.Thr130Met        | 30/277058=0       | VOUS |                                                                                                                      |
| 19  | GJB4  | NM_153212.3    | c.254C>T                         | exonic   | 2 | nonsynonymous | p.Thr85Met         | 8/245960=0        | LP   |                                                                                                                      |
| 86  | GJB4  | NM_153212.3    | c.254C>T                         | exonic   | 2 | nonsynonymous | p.Thr85Met         | 8/245960=0        | LP   |                                                                                                                      |
| 103 | GJB4  | NM_153212.3    | c.384G>A                         | exonic   | 2 | stopgain      | p.Trp128*          | 527/277132=0.002  | P    |                                                                                                                      |
| 151 | GJB4  | NM_153212.3    | c.384G>A                         | exonic   | 2 | stopgain      | p.Trp128*          | 527/277132=0.002  | P    |                                                                                                                      |
| 136 | GJB4  | NM_153212.3    | c.386G>A                         | exonic   | 2 | stopgain      | p.Trp129*          | 59/277112=0       | P    |                                                                                                                      |
| 130 | GJB6  | NM_001370092.1 | c.212T>C                         | exonic   | 5 | nonsynonymous | p.Val71Ala         | 110/277050=0      | VOUS | # 129500<br>ECTODERMAL DYSPLASIA 2, CLOUSTON TYPE; ECTD2 AD                                                          |
| 167 | GJB6  | NM_001370092.1 | c.607A>G                         | exonic   | 5 | nonsynonymous | p.Met203Val        | 247/277132=0.001  | LB   |                                                                                                                      |
| 25  | GJB6  | NM_001370092.1 | c.688A>T                         | exonic   | 5 | nonsynonymous | p.Asn230Tyr        |                   | VOUS |                                                                                                                      |
| 11  | KRT1  | NM_006121.4    | c.860T>C                         | exonic   | 3 | nonsynonymous | p.Ile287Thr        | 1/246176=0        | VOUS | # 113800<br>EPIDERMOLYTIC HYPERKERATOSIS 1; EHK1 #<br>600962<br>PALMOPLANTAR KERATODERMA,<br>NONEPIDERMOLYTIC; NEPPK |
| 34  | KRT1  | NM_006121.4    | c.982A>T                         | exonic   | 5 | nonsynonymous | p.Thr328Ser        | 332/277126=0.001  | LB   |                                                                                                                      |
| 10  | KRT1  | NM_006121.4    | c.1294C>T                        | exonic   | 7 | nonsynonymous | p.Arg432Cys        | 143/277212=0.001  | B    |                                                                                                                      |
| 157 | KRT1  | NM_006121.4    | c.1390G>A                        | exonic   | 7 | nonsynonymous | p.Asp464Asn        | 1/246258=0        | VOUS |                                                                                                                      |
| 178 | KRT1  | NM_006121.4    | c.1693A>G                        | exonic   | 9 | nonsynonymous | p.Ser565Gly        |                   | VOUS |                                                                                                                      |
| 77  | KRT1  | NM_006121.4    | c.1894G>A                        | exonic   | 9 | nonsynonymous | p.Val632Met        | 2/245184=0        | VOUS |                                                                                                                      |
| 131 | KRT1  | NM_006121.4    | c.1912A>G                        | exonic   | 9 | nonsynonymous | p.Thr638Ala        | 35/276622=0       | LB   |                                                                                                                      |
| 21  | KRT10 | NM_001379366.1 | c.257G>A                         | exonic   | 1 | nonsynonymous | p.Arg86His         | 397/264258=0.002  | VOUS | # 609165<br>ICHTHYOSIS WITH CONFETTI; IWC AD<br># 113800<br>EPIDERMOLYTIC HYPERKERATOSIS; EHK AD-AR                  |
| 53  | KRT10 | NM_001379366.1 | c.98C>T                          | exonic   | 1 | nonsynonymous | p.Ser33Phe         | 72/274952=0       | VOUS |                                                                                                                      |
| 110 | KRT10 | NM_001379366.1 | c.71G>A                          | exonic   | 1 | nonsynonymous | p.Gly24Glu         | 34/179406=0       | VOUS |                                                                                                                      |
| 115 | KRT10 | NM_001379366.1 | c.158G>A                         | exonic   | 1 | nonsynonymous | p.Ser53Asn         | 65/276636=0       | VOUS |                                                                                                                      |
| 137 | KRT10 | NM_001379366.1 | c.710+6T>C                       | intronic | 2 |               |                    | 5/277170=0        | VOUS |                                                                                                                      |
| 12  | KRT10 | NM_001379366.1 | c.1495T>C                        | exonic   | 7 | nonsynonymous | p.Tyr499His        | 79/97856=0.001    | VOUS |                                                                                                                      |
| 23  | KRT10 | NM_001379366.1 | c.1524C>G                        | exonic   | 7 | nonsynonymous | p.Ser508Arg        | 153/101426=0.002  | VOUS |                                                                                                                      |
| 88  | KRT10 | NM_001379366.1 | c.1471_1479delCACGGCGGC          | exonic   | 7 | inframe       | p.His491_Gly493del |                   | VOUS |                                                                                                                      |
| 124 | KRT10 | NM_001379366.1 | c.1443_1457delAAGCTCCGGCGGCGG    | exonic   | 7 | inframe       | p.Ser482_Gly486del | 1/99466=0         | VOUS |                                                                                                                      |
| 144 | KRT10 | NM_001379366.1 | c.1650_1667delCAGCAGCTCCGGCGGCGG | exonic   | 7 | inframe       | p.Ser551_Gly556del | 34/219570=0       | VOUS |                                                                                                                      |
| 22  | KRT2  | NM_000423.3    | c.146G>A                         | exonic   | 1 | nonsynonymous | p.Gly49Asp         | 3/242214=0        | VOUS |                                                                                                                      |

|     |        |                |            |          |                  |                 |                   |      |                                                                            |
|-----|--------|----------------|------------|----------|------------------|-----------------|-------------------|------|----------------------------------------------------------------------------|
| 139 | KRT2   | NM_000423.3    | c.317G>A   | exonic   | 1 nonsynonymous  | p.Ser106Asn     | 641/254108=0.003  | B    | # 146800<br>ICHTHYOSIS BULLOSA OF SIEMENS; IBS AD                          |
| 160 | KRT2   | NM_000423.3    | c.767A>G   | exonic   | 2 nonsynonymous  | p.Asn256Ser     | 110/277226=0      | LB   |                                                                            |
| 192 | KRT2   | NM_000423.3    | c.767A>G   | exonic   | 2 nonsynonymous  | p.Asn256Ser     | 110/277226=0      | LB   |                                                                            |
| 27  | KRT2   | NM_000423.3    | c.1550C>G  | exonic   | 9 nonsynonymous  | p.Ala517Gly     | 993/277108=0.004  | LB   |                                                                            |
| 33  | KRT2   | NM_000423.3    | c.1550C>G  | exonic   | 9 nonsynonymous  | p.Ala517Gly     | 993/277108=0.004  | LB   |                                                                            |
| 152 | KRT2   | NM_000423.3    | c.1750A>G  | exonic   | 9 nonsynonymous  | p.Ile584Val     |                   | VOUS |                                                                            |
| 38  | KRT9   | NM_000226.4    | c.245G>A   | exonic   | 1 nonsynonymous  | p.Ser82Asn      | 628/274158=0.002  | VOUS | # 144200<br>PALMOPLANTAR KERATODERMA,<br>EPIDERMOLYTIC; EPPK<br>AD         |
| 73  | KRT9   | NM_000226.4    | c.245G>A   | exonic   | 1 nonsynonymous  | p.Ser82Asn      | 628/274158=0.002  | VOUS |                                                                            |
| 122 | KRT9   | NM_000226.4    | c.245G>A   | exonic   | 1 nonsynonymous  | p.Ser82Asn      | 628/274158=0.002  | VOUS |                                                                            |
| 39  | KRT9   | NM_000226.4    | c.245G>A   | exonic   | 1 nonsynonymous  | p.Ser82Asn      | 628/274158=0.002  | VOUS |                                                                            |
| 168 | KRT9   | NM_000226.4    | c.49G>A    | exonic   | 1 nonsynonymous  | p.Gly17Ser      |                   | VOUS |                                                                            |
| 64  | KRT9   | NM_000226.4    | c.1049C>G  | exonic   | 5 nonsynonymous  | p.Thr350Ser     |                   | VOUS |                                                                            |
| 101 | KRT9   | NM_000226.4    | c.1630G>A  | exonic   | 7 nonsynonymous  | p.Gly544Arg     | 10/179160=0       | VOUS |                                                                            |
| 50  | LIPN   | NM_001102469.1 | c.326A>C   | exonic   | 3 nonsynonymous  | p.Asp109Ala     | 2/245360=0        | VOUS | # 613943<br>ICHTHYOSIS, CONGENITAL, AUTOSOMAL<br>RECESSIVE 8; ARC18        |
| 151 | LIPN   | NM_001102469.1 | c.302delG  | exonic   | 3 frameshift     | p.Gly101Glufs*7 | 50/276298=0       | P    |                                                                            |
| 183 | LIPN   | NM_001102469.1 | c.633T>G   | exonic   | 5 nonsynonymous  | p.Ile211Met     | 12/275930=0       | VOUS |                                                                            |
| 9   | LIPN   | NM_001102469.1 | c.754C>T   | exonic   | 6 nonsynonymous  | p.Leu252Phe     | 872/201394=0.004  | B    |                                                                            |
| 83  | LIPN   | NM_001102469.1 | c.772G>A   | exonic   | 6 nonsynonymous  | p.Glu258Lys     | 316/215004=0.001  | LB   |                                                                            |
| 171 | LIPN   | NM_001102469.1 | c.772G>A   | exonic   | 6 nonsynonymous  | p.Glu258Lys     | 316/215004=0.001  | LB   |                                                                            |
| 173 | LIPN   | NM_001102469.1 | c.772G>A   | exonic   | 6 nonsynonymous  | p.Glu258Lys     | 316/215004=0.001  | LB   |                                                                            |
| 87  | LIPN   | NM_001102469.1 | c.934G>T   | exonic   | 8 nonsynonymous  | p.Asp312Tyr     | 1/152140=0        | VOUS |                                                                            |
| 2   | NIPAL4 | NM_001099287.1 | c.86C>A    | exonic   | 1 stopgain       | p.Ser29*        | 3/121822=0        | P    | # 612281<br>ICHTHYOSIS, CONGENITAL, AUTOSOMAL<br>RECESSIVE 6; ARC16<br>AR  |
| 104 | NIPAL4 | NM_001099287.1 | c.86C>A    | exonic   | 1 stopgain       | p.Ser29*        | 3/121822=0        | P    |                                                                            |
| 127 | NIPAL4 | NM_001099287.1 | c.176C>A   | exonic   | 1 nonsynonymous  | p.Ala59Asp      | 0/242706=0        | VOUS |                                                                            |
| 197 | NIPAL4 | NM_001099287.1 | c.176C>A   | exonic   | 1 nonsynonymous  | p.Ala59Asp      |                   | VOUS |                                                                            |
| 58  | NIPAL4 | NM_001099287.1 | c.238C>A   | exonic   | 2 nonsynonymous  | p.Leu80Ile      |                   | VOUS |                                                                            |
| 64  | NIPAL4 | NM_001099287.1 | c.446C>T   | exonic   | 2 nonsynonymous  | p.Thr149Met     | 294/266230=0.001  | VOUS |                                                                            |
| 120 | NIPAL4 | NM_001099287.1 | c.446C>T   | exonic   | 2 nonsynonymous  | p.Thr149Met     | 294/266230=0.001  | VOUS |                                                                            |
| 190 | NIPAL4 | NM_001099287.1 | c.397G>A   | exonic   | 2 nonsynonymous  | p.Gly133Ser     | 9/277110=0        | VOUS |                                                                            |
| 193 | NIPAL4 | NM_001099287.1 | c.397G>A   | exonic   | 2 nonsynonymous  | p.Gly133Ser     | 9/277110=0        | VOUS |                                                                            |
| 204 | NIPAL4 | NM_001099287.1 | c.296T>C   | exonic   | 2 nonsynonymous  | p.Val99Ala      | 783/277214=0.003  | B    |                                                                            |
| 121 | NIPAL4 | NM_001099287.1 | c.581C>T   | exonic   | 4 nonsynonymous  | p.Thr194Met     | 1/243716=0        | VOUS |                                                                            |
| 179 | NIPAL4 | NM_001099287.1 | c.730G>T   | exonic   | 5 nonsynonymous  | p.Val244Phe     | 170/254010=0.001  | VOUS |                                                                            |
| 192 | NIPAL4 | NM_001099287.1 | c.730G>T   | exonic   | 5 nonsynonymous  | p.Val244Phe     | 170/254010=0.001  | VOUS |                                                                            |
| 1   | NIPAL4 | NM_001099287.1 | c.1105G>A  | exonic   | 6 nonsynonymous  | p.Val369Ile     | 127/276938=0      | VOUS |                                                                            |
| 56  | NIPAL4 | NM_001099287.1 | c.965G>A   | exonic   | 6 nonsynonymous  | p.Arg322Gln     | 10/246210=0       | LP   |                                                                            |
| 141 | NIPAL4 | NM_001099287.1 | c.839G>A   | exonic   | 6 nonsynonymous  | p.Arg280His     | 60/276956=0       | VOUS |                                                                            |
| 51  | PEX7   | NM_000288.4    | c.377A>C   | exonic   | 4 nonsynonymous  | p.Gln126Pr      | 1104/277164=0.004 | VOUS | # 215100<br>RHIZOMELIC CHONDRODYSPLASIA PUNCTATA, TYPE 1; RCDP1            |
| 137 | PEX7   | NM_000288.4    | c.961A>T   | exonic   | 10 nonsynonymous | p.Ile321Phe     |                   | VOUS | PEROXISOME BIOGENESIS DISORDER 9; PBD9                                     |
| 167 | PHYH   | NM_001323080.2 | c.56C>T    | exonic   | 4 nonsynonymous  | p.Thr19Met      | 367/277256=0.001  | VOUS | # 266500<br>REFSUM DISEASE, CLASSIC                                        |
| 156 | PHYH   | NM_001323080.2 | c.301C>G   | exonic   | 6 nonsynonymous  | p.Arg101Gly     | 351/277160=0.001  | VOUS |                                                                            |
| 167 | PHYH   | NM_001323080.2 | c.403G>A   | exonic   | 7 nonsynonymous  | p.Gly135Arg     | 2/246256=0        | LP   |                                                                            |
| 111 | PNPLA1 | NM_001374623.1 | c.116C>G   | exonic   | 1 nonsynonymous  | p.Ala39Gly      |                   | VOUS | # 615024<br>ICHTHYOSIS, CONGENITAL, AUTOSOMAL<br>RECESSIVE 10; ARC10<br>AR |
| 9   | PNPLA1 | NM_001374623.1 | c.383C>T   | exonic   | 2 nonsynonymous  | p.Thr128Met     | 397/276794=0.001  | VOUS |                                                                            |
| 125 | PNPLA1 | NM_001374623.1 | c.472T>A   | exonic   | 3 nonsynonymous  | p.Cys158Ser     |                   | VOUS |                                                                            |
| 58  | PNPLA1 | NM_001374623.1 | c.592G>T   | exonic   | 4 nonsynonymous  | p.Asp198Tyr     |                   | VOUS |                                                                            |
| 107 | PNPLA1 | NM_001374623.1 | c.714+7G>A | intronic | 4                |                 | 2/244890=0        | VOUS |                                                                            |
| 85  | PNPLA1 | NM_001374623.1 | c.745G>A   | exonic   | 5 nonsynonymous  | p.Glu249Lys     | 803/138609=0.006  | LB   |                                                                            |
| 19  | PNPLA1 | NM_001374623.1 | c.745G>A   | exonic   | 5 nonsynonymous  | p.Glu249Lys     | 813/277218=0.003  | LB   |                                                                            |
| 28  | PNPLA1 | NM_001374623.1 | c.745G>A   | exonic   | 5 nonsynonymous  | p.Glu249Lys     | 813/277218=0.003  | LB   |                                                                            |
| 44  | PNPLA1 | NM_001374623.1 | c.745G>A   | exonic   | 5 nonsynonymous  | p.Glu249Lys     | 813/277218=0.003  | LB   |                                                                            |
| 83  | PNPLA1 | NM_001374623.1 | c.745G>A   | exonic   | 5 nonsynonymous  | p.Glu249Lys     | 813/277218=0.003  | LB   |                                                                            |
| 99  | PNPLA1 | NM_001374623.1 | c.745G>A   | exonic   | 5 nonsynonymous  | p.Glu249Lys     | 813/277218=0.003  | LB   |                                                                            |
| 103 | PNPLA1 | NM_001374623.1 | c.745G>A   | exonic   | 5 nonsynonymous  | p.Glu249Lys     | 813/277218=0.003  | LB   |                                                                            |
| 62  | PNPLA1 | NM_001374623.1 | c.922A>G   | exonic   | 6 nonsynonymous  | p.Thr308Ala     |                   | VOUS |                                                                            |
| 160 | PNPLA1 | NM_001374623.1 | c.985T>C   | exonic   | 6 nonsynonymous  | p.Ser329Pro     | 615/276868=0.002  | VOUS |                                                                            |
| 30  | PNPLA1 | NM_001374623.1 | c.1464T>A  | exonic   | 7 stopgain       | p.Tyr488*       | 3104/273832=0.011 | LB   |                                                                            |
| 46  | PNPLA1 | NM_001374623.1 | c.1464T>A  | exonic   | 7 stopgain       | p.Tyr488*       | 3104/273832=0.011 | LB   |                                                                            |
| 6   | PNPLA1 | NM_001374623.1 | c.1464T>A  | exonic   | 7 stopgain       | p.Tyr488*       | 3104/273832=0.011 | LB   |                                                                            |
| 18  | PNPLA1 | NM_001374623.1 | c.1464T>A  | exonic   | 7 stopgain       | p.Tyr488*       | 3104/273832=0.011 | LB   |                                                                            |
| 44  | PNPLA1 | NM_001374623.1 | c.1464T>A  | exonic   | 7 stopgain       | p.Tyr488*       | 3104/273832=0.011 | LB   |                                                                            |
| 57  | PNPLA1 | NM_001374623.1 | c.1464T>A  | exonic   | 7 stopgain       | p.Tyr488*       | 3104/273832=0.011 | LB   |                                                                            |
| 78  | PNPLA1 | NM_001374623.1 | c.1464T>A  | exonic   | 7 stopgain       | p.Tyr488*       | 3104/273832=0.011 | LB   |                                                                            |
| 84  | PNPLA1 | NM_001374623.1 | c.1464T>A  | exonic   | 7 stopgain       | p.Tyr488*       | 3104/273832=0.011 | LB   |                                                                            |

|     |          |                |                   |          |    |               |              |                   |      |                                                                                                                       |
|-----|----------|----------------|-------------------|----------|----|---------------|--------------|-------------------|------|-----------------------------------------------------------------------------------------------------------------------|
| 95  | PNPLA1   | NM_001374623.1 | c.1464T>A         | exonic   | 7  | stopgain      | p.Tyr488*    | 3104/273832=0.011 | LB   |                                                                                                                       |
| 105 | PNPLA1   | NM_001374623.1 | c.1464T>A         | exonic   | 7  | stopgain      | p.Tyr488*    | 3104/273832=0.011 | LB   |                                                                                                                       |
| 112 | PNPLA1   | NM_001374623.1 | c.1464T>A         | exonic   | 7  | stopgain      | p.Tyr488*    | 3104/273832=0.011 | LB   |                                                                                                                       |
| 123 | PNPLA1   | NM_001374623.1 | c.1464T>A         | exonic   | 7  | stopgain      | p.Tyr488*    | 3104/273832=0.011 | LB   |                                                                                                                       |
| 142 | PNPLA1   | NM_001374623.1 | c.1464T>A         | exonic   | 7  | stopgain      | p.Tyr488*    | 3104/273832=0.011 | LB   |                                                                                                                       |
| 145 | PNPLA1   | NM_001374623.1 | c.1464T>A         | exonic   | 7  | stopgain      | p.Tyr488*    | 3104/273832=0.011 | LB   |                                                                                                                       |
| 155 | PNPLA1   | NM_001374623.1 | c.1464T>A         | exonic   | 7  | stopgain      | p.Tyr488*    | 3104/273832=0.011 | LB   |                                                                                                                       |
| 161 | PNPLA1   | NM_001374623.1 | c.1464T>A         | exonic   | 7  | stopgain      | p.Tyr488*    | 3104/273832=0.011 | LB   |                                                                                                                       |
| 163 | PNPLA1   | NM_001374623.1 | c.1464T>A         | exonic   | 7  | stopgain      | p.Tyr488*    | 3104/273832=0.011 | LB   |                                                                                                                       |
| 121 | SERPINB7 | NM_003784.4    | c.220T>C          | exonic   | 4  | nonsynonymous | p.Ser74Pro   | 9/247468=0        | VOUS | # 615598<br>PALMOPLANTAR KERATODERMA, NAGASHIMA<br>TYPE; PPKN                                                         |
| 133 | SERPINB7 | NM_003784.4    | c.220T>C          | exonic   | 4  | nonsynonymous | p.Ser74Pro   | 9/247468=0        | VOUS |                                                                                                                       |
| 176 | SERPINB7 | NM_003784.4    | c.220T>C          | exonic   | 4  | nonsynonymous | p.Ser74Pro   | 9/247468=0        | VOUS |                                                                                                                       |
| 192 | SERPINB7 | NM_003784.4    | c.715G>A          | exonic   | 7  | nonsynonymous | p.Val239Ile  | 20/276514=0       | VOUS |                                                                                                                       |
| 97  | SERPINB7 | NM_003784.4    | c.833A>G          | exonic   | 8  | nonsynonymous | p.Gln278Arg  | 42/275758=0       | VOUS |                                                                                                                       |
| 108 | SERPINB7 | NM_003784.4    | c.833A>G          | exonic   | 8  | nonsynonymous | p.Gln278Arg  | 42/275758=0       | VOUS |                                                                                                                       |
| 127 | SERPINB7 | NM_003784.4    | c.992A>C          | exonic   | 8  | nonsynonymous | p.Glu331Ala  | 113/276360=0      | VOUS |                                                                                                                       |
| 10  | SERPINB8 | NM_001366198.1 | c.304C>T          | exonic   | 3  | nonsynonymous | p.Pro102Ser  | 352/276834=0.001  | LB   | # 617115<br>PEELING SKIN SYNDROME 5; PSS5<br>AR                                                                       |
| 128 | SERPINB8 | NM_001366198.1 | c.254T>G          | exonic   | 3  | nonsynonymous | p.Leu85Trp   | 568/277052=0.002  | VOUS |                                                                                                                       |
| 137 | SERPINB8 | NM_001366198.1 | c.254T>G          | exonic   | 3  | nonsynonymous | p.Leu85Trp   | 568/277052=0.002  | B    |                                                                                                                       |
| 50  | SERPINB8 | NM_001366198.1 | c.872C>G          | exonic   | 7  | nonsynonymous | p.Ala291Gly  | 60/277244=0       | VOUS |                                                                                                                       |
| 69  | SERPINB8 | NM_001366198.1 | c.866T>C          | exonic   | 7  | nonsynonymous | p.Ile289Thr  | 9/246270=0        | VOUS |                                                                                                                       |
| 109 | SERPINB8 | NM_001366198.1 | c.988G>A          | exonic   | 7  | nonsynonymous | p.Ala330Thr  | 61/276742=0       | VOUS |                                                                                                                       |
| 113 | SERPINB8 | NM_001366198.1 | c.1121C>T         | exonic   | 7  | nonsynonymous | p.Pro374Leu  | 9/273242=0        | VOUS |                                                                                                                       |
| 65  | SLC27A4  | NM_005094.4    | c.250G>A          | exonic   | 3  | nonsynonymous | p.Val84Ile   | 2/245924=0        | VOUS | # 608649<br>ICHTHYOSIS PREMATUREITY SYNDROME; IPS<br><br>Alternative titles; symbols<br>ICHTHYOSIS CONGENITA IV<br>AR |
| 198 | SLC27A4  | NM_005094.4    | c.742G>A          | exonic   | 5  | nonsynonymous | p.Gly248Ser  |                   | LP   |                                                                                                                       |
| 172 | SLC27A4  | NM_005094.4    | c.952C>T          | exonic   | 7  | nonsynonymous | p.Arg318Trp  | 28/277118=0       | VOUS |                                                                                                                       |
| 147 | SLC27A4  | NM_005094.4    | c.1300G>A         | exonic   | 9  | nonsynonymous | p.Gly434Ser  | 9/245968=0        | VOUS |                                                                                                                       |
| 16  | SLC27A4  | NM_005094.4    | c.1415_1417delAGA | exonic   | 10 | inframe       | p.Lys472del  | 8/245700=0        | VOUS |                                                                                                                       |
| 179 | SLC27A4  | NM_005094.4    | c.1788C>G         | exonic   | 13 | nonsynonymous | p.Phe596Leu  | 3/246250=0        | VOUS |                                                                                                                       |
| 45  | SNAP29   | NM_004782.4    | c.130T>C          | exonic   | 1  | nonsynonymous | p.Tyr44His   | 649/251920=0.003  | LB   | # 609528<br>CEREBRAL DYSGENESIS, NEUROPATHY, ICHTHYOSIS, AND<br>PALMOPLANTAR KERATODERMA SYNDROME; CEDNIK             |
| 137 | SNAP29   | NM_004782.4    | c.113C>T          | exonic   | 1  | nonsynonymous | p.Pro38Leu   | 139/246926=0.001  | B    |                                                                                                                       |
| 65  | SPINK5   | NM_001127698.2 | c.677A>G          | exonic   | 9  | nonsynonymous | p.Lys226Arg  | 8/276568=0        | LB   | # 256500<br>NETHERTON SYNDROME; NETH                                                                                  |
| 164 | SPINK5   | NM_001127698.2 | c.1362G>C         | exonic   | 15 | nonsynonymous | p.Glu454Asp  | 1/245736=0        | LB   |                                                                                                                       |
| 165 | SPINK5   | NM_001127698.2 | c.1362G>C         | exonic   | 15 | nonsynonymous | p.Glu454Asp  | 1/245736=0        | LB   |                                                                                                                       |
| 82  | SPINK5   | NM_001127698.2 | c.1451G>A         | exonic   | 16 | nonsynonymous | p.Arg484Lys  | 343/276350=0.001  | LB   |                                                                                                                       |
| 126 | SPINK5   | NM_001127698.2 | c.1451G>A         | exonic   | 16 | nonsynonymous | p.Arg484Lys  | 343/276350=0.001  | LB   |                                                                                                                       |
| 192 | SPINK5   | NM_001127698.2 | c.1451G>A         | exonic   | 16 | nonsynonymous | p.Arg484Lys  | 343/276350=0.001  | LB   |                                                                                                                       |
| 9   | SPINK5   | NM_001127698.2 | c.1552C>T         | exonic   | 17 | nonsynonymous | p.Arg518Cys  | 879/277134=0.003  | B    |                                                                                                                       |
| 48  | SPINK5   | NM_001127698.2 | c.1964G>A         | exonic   | 21 | nonsynonymous | p.Gly655Asp  | 760/276990=0.003  | LB   |                                                                                                                       |
| 91  | SPINK5   | NM_001127698.2 | c.1964G>A         | exonic   | 21 | nonsynonymous | p.Gly655Asp  | 760/276990=0.003  | LB   |                                                                                                                       |
| 90  | SPINK5   | NM_001127698.2 | c.2243A>G         | exonic   | 24 | nonsynonymous | p.Glu748Gly  | 800/276940=0.003  | B    |                                                                                                                       |
| 97  | SPINK5   | NM_001127698.2 | c.2243A>G         | exonic   | 24 | nonsynonymous | p.Glu748Gly  | 800/276940=0.003  | B    |                                                                                                                       |
| 45  | SPINK5   | NM_001127698.2 | c.2852A>G         | exonic   | 30 | nonsynonymous | p.Asn951Ser  | 1264/277148=0.005 | LB   |                                                                                                                       |
| 100 | SPINK5   | NM_001127698.2 | c.2954T>C         | exonic   | 30 | nonsynonymous | p.Val985Ala  | 982/276828=0.004  | LB   |                                                                                                                       |
| 124 | SPINK5   | NM_001127698.2 | c.2954T>C         | exonic   | 30 | nonsynonymous | p.Val985Ala  | 982/276828=0.004  | LB   |                                                                                                                       |
| 171 | SPINK5   | NM_001127698.2 | c.2852A>G         | exonic   | 30 | nonsynonymous | p.Asn951Ser  | 1264/277148=0.005 | LB   |                                                                                                                       |
| 52  | SPINK5   | NM_001127698.2 | c.3167T>G         | exonic   | 32 | nonsynonymous | p.Met1056Arg | 26/246178=0       | VOUS |                                                                                                                       |
| 108 | SPINK5   | NM_001127698.2 | c.3167T>G         | exonic   | 32 | nonsynonymous | p.Met1056Arg | 26/246178=0       | VOUS |                                                                                                                       |
| 11  | SPINK5   | NM_001127698.2 | c.3256G>A         | exonic   | 33 | nonsynonymous | p.Ala1086Thr | 9/277070=0        | LB   |                                                                                                                       |
| 186 | ST14     | NM_021978.4    | c.145A>T          | exonic   | 2  | stopgain      | p.Lys49*     |                   | P    | # 602400<br>ICHTHYOSIS, CONGENITAL, AUTOSOMAL<br>RECESSIVE 11; ARCI11                                                 |
| 193 | ST14     | NM_021978.4    | c.508G>A          | exonic   | 5  | nonsynonymous | p.Glu170Lys  | 521/276770=0.002  | LB   |                                                                                                                       |
| 4   | ST14     | NM_021978.4    | c.508G>A          | exonic   | 5  | nonsynonymous | p.Glu170Lys  | 521/276770=0.002  | LB   |                                                                                                                       |
| 43  | ST14     | NM_021978.4    | c.454A>G          | exonic   | 5  | nonsynonymous | p.Ile152Val  | 876/276060=0.003  | LB   |                                                                                                                       |
| 124 | ST14     | NM_021978.4    | c.454A>G          | exonic   | 5  | nonsynonymous | p.Ile152Val  | 876/276060=0.003  | B    |                                                                                                                       |
| 146 | ST14     | NM_021978.4    | c.508G>A          | exonic   | 5  | nonsynonymous | p.Glu170Lys  | 521/276770=0.002  | VOUS |                                                                                                                       |
| 10  | ST14     | NM_021978.4    | c.830C>T          | exonic   | 7  | nonsynonymous | p.Thr277Met  | 168/254380=0.001  | LB   |                                                                                                                       |
| 100 | ST14     | NM_021978.4    | c.800C>A          | exonic   | 7  | nonsynonymous | p.Ser267Tyr  | 2/240850=0        | VOUS |                                                                                                                       |
| 159 | ST14     | NM_021978.4    | c.967C>T          | exonic   | 8  | nonsynonymous | p.Arg323Trp  | 2/246262=0        | VOUS |                                                                                                                       |
| 102 | ST14     | NM_021978.4    | c.1034G>A         | exonic   | 9  | nonsynonymous | p.Arg345His  | 302/277184=0.001  | B    |                                                                                                                       |
| 103 | ST14     | NM_021978.4    | c.1975A>G         | exonic   | 16 | nonsynonymous | p.Ile659Val  | 33/245026=0       | LB   |                                                                                                                       |
| 159 | ST14     | NM_021978.4    | c.1975A>G         | exonic   | 16 | nonsynonymous | p.Ile659Val  | 33/245026=0       | LB   |                                                                                                                       |
| 157 | ST14     | NM_021978.4    | c.2146G>C         | exonic   | 17 | nonsynonymous | p.Glu716Gln  |                   | VOUS |                                                                                                                       |
| 194 | ST14     | NM_021978.4    | c.2406+4G>C       | intronic | 18 |               |              | 193/212654=0.001  | B    |                                                                                                                       |
| 169 | ST14     | NM_021978.4    | c.2553G>C         | exonic   | 19 | nonsynonymous | p.Glu851Asp  | 6/276830=0        | VOUS |                                                                                                                       |

|     |          |                |                  |          |    |               |                  |                   |      |                                                                                      |
|-----|----------|----------------|------------------|----------|----|---------------|------------------|-------------------|------|--------------------------------------------------------------------------------------|
| 140 | STS      | NM_001320751.2 | c.478C>T         | exonic   | 7  | nonsynonymous | p.His160Tyr      |                   | VOUS | # 308100<br>ICHTHYOSIS, X-LINKED; XLI                                                |
| 125 | STS      | NM_001320751.2 | c.1147A>G        | exonic   | 10 | nonsynonymous | p.Ile383Val      | 9/178456=0        | VOUS |                                                                                      |
| 162 | STS      | NM_001320751.2 | c.1168C>T        | exonic   | 10 | nonsynonymous | p.Arg390Cys      | 4/178511=0        | VOUS |                                                                                      |
| 177 | STS      | NM_001320751.2 | c.1274A>G        | exonic   | 10 | nonsynonymous | p.Asp425Gly      | 184/199731=0.001  | B    |                                                                                      |
| 134 | SULT2B1  | NM_004605.2    | c.107T>C         | exonic   | 1  | nonsynonymous | p.Leu36Ser       | 1287/274634=0.005 | B    | # 617571<br>ICHTHYOSIS, CONGENITAL, AUTOSOMAL<br>RECESSIVE 14; ARCI14                |
| 195 | SULT2B1  | NM_004605.2    | c.107T>C         | exonic   | 1  | nonsynonymous | p.Leu36Ser       | 1287/274634=0.005 | B    |                                                                                      |
| 140 | SULT2B1  | NM_004605.2    | c.232C>T         | exonic   | 2  | nonsynonymous | p.Arg78Cys       | 252/276636=0.001  | B    |                                                                                      |
| 167 | SULT2B1  | NM_004605.2    | c.232C>T         | exonic   | 2  | nonsynonymous | p.Arg78Cys       | 252/276636=0.001  | B    |                                                                                      |
| 132 | SULT2B1  | NM_004605.2    | c.600+3G>A       | intronic | 4  |               |                  |                   | VOUS |                                                                                      |
| 75  | SULT2B1  | NM_004605.2    | c.673G>A         | exonic   | 5  | nonsynonymous | p.Val225Ile      | 220/272762=0.001  | VOUS |                                                                                      |
| 24  | SULT2B1  | NM_004605.2    | c.668G>A         | exonic   | 5  | nonsynonymous | p.Gly223Asp      | 3/272700=0        | VOUS |                                                                                      |
| 25  | SULT2B1  | NM_004605.2    | c.867G>A         | exonic   | 6  | nonsynonymous | p.Met289Ile      | 270/262312=0.001  | B    |                                                                                      |
| 64  | SULT2B1  | NM_004605.2    | c.1045C>T        | exonic   | 6  | nonsynonymous | p.Pro349Ser      | 100/144788=0.001  | VOUS |                                                                                      |
| 202 | SULT2B1  | NM_004605.2    | c.867G>A         | exonic   | 6  | nonsynonymous | p.Met289Ile      | 270/262312=0.001  | B    |                                                                                      |
| 204 | SULT2B1  | NM_004605.2    | c.867G>A         | exonic   | 6  | nonsynonymous | p.Met289Ile      | 270/262312=0.001  | B    |                                                                                      |
| 137 | SUMF1    | NM_182760.4    | c.59T>G          | exonic   | 1  | nonsynonymous | p.Leu20Ar        | 988/267246=0.004  | B    | # 272200<br>MULTIPLE SULFATASE DEFICIENCY; MSD AR                                    |
| 184 | SUMF1    | NM_182760.4    | c.131G>A         | exonic   | 1  | nonsynonymous | p.Gly44Glu       |                   | VOUS |                                                                                      |
| 129 | SUMF1    | NM_182760.4    | c.664G>C         | exonic   | 5  | nonsynonymous | p.Gly222Arg      | 450/277142=0.002  | VOUS |                                                                                      |
| 107 | SUMF1    | NM_182760.4    | c.935T>C         | exonic   | 7  | nonsynonymous | p.Val312Ala      |                   | VOUS |                                                                                      |
| 59  | TGM1     | NM_000359.3    | c.61A>G          | exonic   | 2  | nonsynonymous | p.Thr21Ala       | 372/276110=0.001  | LB   | # 242300<br>ICHTHYOSIS, CONGENITAL, AUTOSOMAL<br>RECESSIVE 1; ARCI1                  |
| 139 | TGM1     | NM_000359.3    | c.90_95dupGCCAGA | exonic   | 2  | inframe       | p.Glu30_Pro31dup | 132/276714=0      | LB   |                                                                                      |
| 152 | TGM1     | NM_000359.3    | c.208G>T         | exonic   | 2  | nonsynonymous | p.Gly70Cys       |                   | VOUS |                                                                                      |
| 189 | TGM1     | NM_000359.3    | c.208G>T         | exonic   | 2  | nonsynonymous | p.Gly70Cys       |                   | VOUS |                                                                                      |
| 5   | TGM1     | NM_000359.3    | c.359C>T         | exonic   | 3  | nonsynonymous | p.Ser120Leu      | 7/245944=0        | VOUS |                                                                                      |
| 76  | TGM1     | NM_000359.3    | c.746C>T         | exonic   | 4  | nonsynonymous | p.Pro249Leu      |                   | VOUS |                                                                                      |
| 61  | TGM1     | NM_000359.3    | c.680A>G         | exonic   | 4  | nonsynonymous | p.Gln227Arg      |                   | VOUS |                                                                                      |
| 179 | TGM1     | NM_000359.3    | c.550C>T         | exonic   | 4  | nonsynonymous | p.Pro184Ser      | 183/277094=0.001  | VOUS |                                                                                      |
| 187 | TGM1     | NM_000359.3    | c.550C>T         | exonic   | 4  | nonsynonymous | p.Pro184Ser      | 183/277094=0.001  | LB   |                                                                                      |
| 42  | TGM1     | NM_000359.3    | c.920G>A         | exonic   | 6  | nonsynonymous | p.Arg307Gln      | 124/275156=0      | B    |                                                                                      |
| 77  | TGM1     | NM_000359.3    | c.1492-19T>A     | intronic | 11 |               |                  | 7/245872=0        | VOUS |                                                                                      |
| 35  | TGM1     | NM_000359.3    | c.1717C>T        | exonic   | 12 | nonsynonymous | p.Arg573Trp      | 7/277016=0        | VOUS |                                                                                      |
| 92  | TGM1     | NM_000359.3    | c.2338G>A        | exonic   | 15 | nonsynonymous | p.Gly780Ser      | 1/246154=0        | VOUS |                                                                                      |
| 124 | TGM1     | NM_000359.3    | c.2405A>T        | exonic   | 15 | nonsynonymous | p.Asp802Val      | 262/277042=0.001  | B    |                                                                                      |
| 98  | VPS33B   | NM_018668.4    | c.97-3C>T        | intronic | 2  |               |                  |                   | VOUS | # 620009<br>KERATODERMA-ICHTHYOSIS-DEAFNESS SYNDROME,<br>AUTOSOMAL RECESSIVE; KDIDAR |
| 147 | VPS33B   | NM_018668.4    | c.1166G>A        | exonic   | 15 | nonsynonymous | p.Arg389Gln      | 590/277118=0.002  | B    |                                                                                      |
| 170 | VPS33B   | NM_018668.4    | c.1307A>G        | exonic   | 18 | nonsynonymous | p.Asn436Ser      | 15/277084=0       | VOUS |                                                                                      |
| 174 | VPS33B   | NM_018668.4    | c.1274G>A        | exonic   | 18 | nonsynonymous | p.Ser425Asn      | 350/277058=0.001  | B    |                                                                                      |
| 203 | VPS33B   | NM_018668.4    | c.1837A>T        | exonic   | 23 | nonsynonymous | p.Ser613Cys      |                   | VOUS |                                                                                      |
| 111 | ZMPSTE24 | NM_005857.3    | c.1106G>A        | exonic   | 9  | nonsynonymous | p.Arg369Gln      | 199/277132=0.001  | B    | # 275210<br>RESTRICTIVE DERMOPATHY 1; RSDM1 AR                                       |
| 118 | ZMPSTE24 | NM_005857.3    | c.1235G>A        | exonic   | 10 | nonsynonymous | p.Arg412His      | 11/246164=0       | VOUS |                                                                                      |
