# Supplementary material for: Comprehensive Molecular Analysis of Disease-Related Genes as First-Tier Test for Early Diagnosis, Classification, and Management of Patients Affected by Nonsyndromic Ichthyosis
Source: MDPI journal article supplement (doi:10.3390/biomedicines12051112), 2024-05-17
Supplement: s1 [file s1]

Table S3. Number of different rare variants identified in ichthyosis-related genes of 300 unaffected individuals

| GENE    | GenBank #      | Nucleotide variant | gene position | Exon | Presumed effect | Presumed protein variant | gnomAD frequency  |
|---------|----------------|--------------------|---------------|------|-----------------|--------------------------|-------------------|
| ABCA12  | NM_173076.3    | c.300T>G           | exonic        | 3    | nonsynonymous   | p.Asp100Glu              | 6/276566=0        |
| ABCA12  | NM_173076.3    | c.346G>T           | exonic        | 4    | nonsynonymous   | p.Asp116Tyr              | 7/245398=0        |
| ABCA12  | NM_173076.3    | c.485C>T           | exonic        | 5    | nonsynonymous   | p.Ala162Val              | 384/276512=0.001  |
| ABCA12  | NM_173076.3    | c.501G>C           | exonic        | 5    | nonsynonymous   | p.Leu167Phe              |                   |
| ABCA12  | NM_173076.3    | c.539T>C           | exonic        | 6    | nonsynonymous   | p.Ile180Thr              | 3/245112=0        |
| ABCA12  | NM_173076.3    | c.1141G>C          | exonic        | 10   | nonsynonymous   | p.Val381Leu              | 239/277242=0.001  |
| ABCA12  | NM_173076.3    | c.1222T>C          | exonic        | 11   | nonsynonymous   | p.Ser408Pro              | 322/276876=0.001  |
| ABCA12  | NM_173076.3    | c.1446A>C          | exonic        | 12   | nonsynonymous   | p.Glu482Asp              | 29/276918=0       |
| ABCA12  | NM_173076.3    | c.1475A>G          | exonic        | 12   | nonsynonymous   | p.Asn492Ser              | 5/276916=0        |
| ABCA12  | NM_173076.3    | c.1743C>G          | exonic        | 14   | nonsynonymous   | p.Asp581Glu              | 246/277138=0.001  |
| ABCA12  | NM_173076.3    | c.1816G>A          | exonic        | 15   | nonsynonymous   | p.Asp606Asn              | 2/245978=0        |
| ABCA12  | NM_173076.3    | c.2129A>G          | exonic        | 17   | nonsynonymous   | p.Tyr710Cys              | 1/246028=0        |
| ABCA12  | NM_173076.3    | c.2243G>A          | exonic        | 17   | nonsynonymous   | p.Arg748Lys              | 6/245968=0        |
| ABCA12  | NM_173076.3    | c.3098T>C          | exonic        | 22   | nonsynonymous   | p.Ile1033Thr             | 2/245894=0        |
| ABCA12  | NM_173076.3    | c.3481A>T          | exonic        | 24   | nonsynonymous   | p.Met1161Leu             | 363/277160=0.001  |
| ABCA12  | NM_173076.3    | c.4618G>T          | exonic        | 31   | nonsynonymous   | p.Ala1540Ser             | 9/245910=0        |
| ABCA12  | NM_173076.3    | c.5051T>C          | exonic        | 33   | nonsynonymous   | p.Ile1684Thr             | 4/245586=0        |
| ABCA12  | NM_173076.3    | c.5617G>A          | exonic        | 37   | nonsynonymous   | p.Val1873Ile             | 670/276578=0.002  |
| ABCA12  | NM_173076.3    | c.6208G>A          | exonic        | 42   | nonsynonymous   | p.Val2070Ile             | 514/276952=0.002  |
| ABCA12  | NM_173076.3    | c.6704A>C          | exonic        | 45   | nonsynonymous   | p.Glu2235Ala             | 184/277156=0.001  |
| ABCA12  | NM_173076.3    | c.6919A>G          | exonic        | 46   | nonsynonymous   | p.Ile2307Val             | 486/277078=0.002  |
| ABCA12  | NM_173076.3    | c.7631C>T          | exonic        | 52   | nonsynonymous   | p.Thr2544Ile             | 379/276596=0.001  |
| ABHD5   | NM_001365649.1 | c.22A>G            | exonic        | 3    | nonsynonymous   | p.Thr8Ala                | 12/237020=0       |
| ABHD5   | NM_001365649.1 | c.505C>G           | exonic        | 4    | nonsynonymous   | p.Pro169Ala              | 21/277218=0       |
| ABHD5   | NM_001365649.1 | c.883G>T           | exonic        | 7    | stopgain        | p.Glu295*                | 1/121404=0        |
| ALDH3A2 | NM_001031806.2 | c.119A>G           | exonic        | 1    | nonsynonymous   | p.Asp40Gly               | 155/218008=0.001  |
| ALDH3A2 | NM_001031806.2 | c.28C>G            | exonic        | 1    | nonsynonymous   | p.Gln10Glu               | 806/218946=0.004  |
| ALDH3A2 | NM_001031806.2 | c.17G>C            | exonic        | 2    | nonsynonymous   | p.Arg6Pro                | 3/223156=0        |
| ALDH3A2 | NM_001031806.2 | c.661G>A           | exonic        | 4    | nonsynonymous   | p.Asp221Asn              | 1/244348=0        |
| ALDH3A2 | NM_001031806.2 | c.1270C>T          | exonic        | 9    | nonsynonymous   | p.Pro424Ser              | 1205/277210=0.004 |
| ALOX12B | NM_001139.3    | c.280G>A           | exonic        | 2    | nonsynonymous   | p.Gly94Ser               | 2588/264690       |
| ALOX12B | NM_001139.3    | c.380C>T           | exonic        | 3    | nonsynonymous   | p.Pro127Leu              | 66/276792=0       |
| ALOX12B | NM_001139.3    | c.526G>A           | exonic        | 4    | nonsynonymous   | p.Glu176Lys              | 92/276916=0       |
| ALOX12B | NM_001139.3    | c.556A>T           | exonic        | 5    | nonsynonymous   | p.Ile186Phe              | 0                 |
| ALOX12B | NM_001139.3    | c.715A>G           | exonic        | 6    | nonsynonymous   | p.Ile239Val              | 24/277224=0       |
| ALOX12B | NM_001139.3    | c.1156C>T          | exonic        | 9    | nonsynonymous   | p.Arg386Cys              | 9/276770=0        |
| ALOX12B | NM_001139.3    | c.1431delC         | exonic        | 11   | frameshift      | p.Asp477Glufs*37         | 1/245856=0        |
| ALOX12B | NM_001139.3    | c.1565C>T          | exonic        | 12   | nonsynonymous   | p.Pro522Leu              | 277/277210=0.001  |
| ALOXE3  | NM_001165960.1 | c.30G>T            | exonic        | 1    | nonsynonymous   | p.Leu10Phe               |                   |
| ALOXE3  | NM_001165960.1 | c.62C>T            | exonic        | 1    | nonsynonymous   | p.Pro21Leu               | 16/168304=0       |
| ALOXE3  | NM_001165960.1 | c.280C>G           | exonic        | 2    | nonsynonymous   | p.Pro94Ala               | 143/182810=0.001  |
| ALOXE3  | NM_001165960.1 | c.809G>A           | exonic        | 4    | nonsynonymous   | p.Arg270Gln              | 7/246260=0        |
| ALOXE3  | NM_001165960.1 | c.989T>C           | exonic        | 6    | nonsynonymous   | p.Ile330Thr              | 4/246268=0        |

|         |                |           |        |    |               |             |                   |
|---------|----------------|-----------|--------|----|---------------|-------------|-------------------|
| ALOXE3  | NM_001165960.1 | c.1076C>T | exonic | 6  | nonsynonymous | p.Ala359Val | 51/246268=0       |
| ALOXE3  | NM_001165960.1 | c.1454T>A | exonic | 9  | nonsynonymous | p.Leu485Gln |                   |
| ALOXE3  | NM_001165960.1 | c.1483C>T | exonic | 9  | nonsynonymous | p.Pro495Ser |                   |
| ALOXE3  | NM_001165960.1 | c.1843C>T | exonic | 12 | nonsynonymous | p.His615Tyr |                   |
| ALOXE3  | NM_001165960.1 | c.2102C>A | exonic | 14 | nonsynonymous | p.Thr701Asn | 102/276992=0      |
| ALOXE3  | NM_001165960.1 | c.2404C>T | exonic | 16 | nonsynonymous | p.Arg802Trp | 239/277182=0.001  |
| ALOXE3  | NM_001165960.1 | c.2510T>C | exonic | 16 | nonsynonymous | p.Ile837Thr | 333/277202=0.001  |
| CDSN    | NM_001264.4    | c.32G>A   | exonic | 1  | nonsynonymous | p.Arg11His  | 790/239488=0.003  |
| CDSN    | NM_001264.4    | c.1302C>A | exonic | 2  | nonsynonymous | p.Ser434Arg | 916/276996=0.003  |
| CDSN    | NM_001264.4    | c.475A>G  | exonic | 2  | nonsynonymous | p.Ser159Gly | 47/276174=0       |
| CDSN    | NM_001264.4    | c.782G>T  | exonic | 2  | nonsynonymous | p.Gly261Val |                   |
| CAST    | NM_001750.7    | c.200C>T  | exonic | 3  | nonsynonymous | p.Ser67Leu  | 12/276074=0       |
| CAST    | NM_001750.7    | c.620C>T  | exonic | 9  | nonsynonymous | p.Pro207Leu | 5/246206=0        |
| CAST    | NM_001750.7    | c.775A>G  | exonic | 11 | nonsynonymous | p.Thr259Ala | 943/276512=0.003  |
| CAST    | NM_001750.7    | c.925A>C  | exonic | 14 | nonsynonymous | p.Ile309Leu | 2994/276670=0.011 |
| CAST    | NM_001750.7    | c.986C>G  | exonic | 14 | nonsynonymous | p.Ala329Gly | 74/276982=0       |
| CAST    | NM_001750.7    | c.1177C>T | exonic | 16 | nonsynonymous | p.Arg393Cys | 34/276754=0       |
| CAST    | NM_001750.7    | c.1207G>C | exonic | 17 | nonsynonymous | p.Ala403Pro | 1334/276854=0.005 |
| CAST    | NM_001750.7    | c.1283C>T | exonic | 17 | nonsynonymous | p.Thr428Met | 909/277064=0.003  |
| CAST    | NM_001750.7    | c.1835A>G | exonic | 25 | nonsynonymous | p.Lys612Arg | 585/265502=0.002  |
| CLDN1   | NM_021101.5    | c.136A>T  | exonic | 1  | nonsynonymous | p.Met46Leu  | 15/246242=0       |
| CLDN1   | NM_021101.5    | c.278T>C  | exonic | 2  | nonsynonymous | p.Ile93Thr  |                   |
| CLDN1   | NM_021101.5    | c.631G>A  | exonic | 4  | nonsynonymous | p.Val211Met | 30/277152=0       |
| CERS3   | NM_001290341.2 | c.233C>T  | exonic | 6  | nonsynonymous | p.Ser78Leu  |                   |
| CERS3   | NM_001290341.2 | c.914A>G  | exonic | 13 | nonsynonymous | p.His305Arg | 3292/264968=0.012 |
| CERS3   | NM_001290341.2 | c.1151G>A | exonic | 14 | nonsynonymous | p.Arg384Lys | 481/277162=0.002  |
| CYP4F22 | NM_173483.4    | c.109C>T  | exonic | 3  | nonsynonymous | p.Arg37Cys  | 32/121338=0       |
| CYP4F22 | NM_173483.4    | c.68C>T   | exonic | 3  | nonsynonymous | p.Ala23Val  | 45/277126=0       |
| CYP4F22 | NM_173483.4    | c.463C>T  | exonic | 6  | nonsynonymous | p.His155Tyr | 121/277112=0      |
| CYP4F22 | NM_173483.4    | c.485C>G  | exonic | 6  | nonsynonymous | p.Ala162Gly | 47/277122=0       |
| CYP4F22 | NM_173483.4    | c.665G>T  | exonic | 7  | nonsynonymous | p.Cys222Phe |                   |
| CYP4F22 | NM_173483.4    | c.712G>A  | exonic | 8  | nonsynonymous | p.Ala238Thr |                   |
| CYP4F22 | NM_173483.4    | c.851G>A  | exonic | 8  | nonsynonymous | p.Arg284Gln | 9/276864=0        |
| CYP4F22 | NM_173483.4    | c.1148C>T | exonic | 11 | nonsynonymous | p.Thr383Ile |                   |
| ELOVL4  | NM_022726.4    | c.243C>G  | exonic | 2  | nonsynonymous | p.Ile81Met  |                   |
| ELOVL4  | NM_022726.4    | c.800T>C  | exonic | 6  | nonsynonymous | p.Ile267Thr | 2004/276984=0.007 |
| ELOVL4  | NM_022726.4    | c.814G>C  | exonic | 6  | nonsynonymous | p.Glu272Gln | 2735/277052=0.01  |
| GJA1    | NM_000165.5    | c.1108C>T | exonic | 2  | nonsynonymous | p.Arg370Cys | 3/245356=0        |
| GJA1    | NM_000165.5    | c.1109G>A | exonic | 2  | nonsynonymous | p.Arg370His | 1/245340=0        |
| GJA1    | NM_000165.5    | c.157C>T  | exonic | 2  | nonsynonymous | p.Arg53Cys  | 2/246262=0        |
| GJA1    | NM_000165.5    | c.758C>T  | exonic | 2  | nonsynonymous | p.Ala253Val | 2227/277148=0.008 |
| GJB2    | NM_004004.6    | c.101T>C  | exonic | 2  | nonsynonymous | p.Met34Thr  | 2487/276420=0.009 |
| GJB2    | NM_004004.6    | c.109G>A  | exonic | 2  | nonsynonymous | p.Val37Ile  | 2011/276450=0.007 |
| GJB2    | NM_004004.6    | c.23C>T   | exonic | 2  | nonsynonymous | p.Thr8Met   | 21/275096=0       |
| GJB2    | NM_004004.6    | c.269T>C  | exonic | 2  | nonsynonymous | p.Leu90Pro  | 177/277032=0.001  |

|       |                |                                   |          |                 |                    |                   |
|-------|----------------|-----------------------------------|----------|-----------------|--------------------|-------------------|
| GJB2  | NM_004004.6    | c.296G>A                          | exonic   | 2 nonsynonymous | p.Arg99Lys         |                   |
| GJB2  | NM_004004.6    | c.358_360delGAG                   | exonic   | 2 inframe       | p.Glu120del        | 20/275990=0       |
| GJB2  | NM_004004.6    | c.35delG                          | exonic   | 2 frameshift    | p.Gly12Valfs*2     | 1721/275002=0.006 |
| GJB2  | NM_004004.6    | c.457G>A                          | exonic   | 2 nonsynonymous | p.Val153Ile        | 2433/276862=0.009 |
| GJB2  | NM_004004.6    | c.467T>A                          | exonic   | 2 nonsynonymous | p.Val156Asp        |                   |
| GJB2  | NM_004004.6    | c.88A>G                           | exonic   | 2 nonsynonymous | p.Ile30Val         |                   |
| GJB3  | NM_024009.3    | c.196_198delGAC                   | exonic   | 2 inframe       | p.Asp66del         | 38/277154=0       |
| GJB3  | NM_024009.3    | c.293G>A                          | exonic   | 2 nonsynonymous | p.Arg98His         | 23/276870=0       |
| GJB3  | NM_024009.3    | c.316C>T                          | exonic   | 2 nonsynonymous | p.Arg106Cys        | 40/276618=0       |
| GJB3  | NM_024009.3    | c.422T>C                          | exonic   | 2 nonsynonymous | p.Ile141Thr        |                   |
| GJB3  | NM_024009.3    | c.529T>G                          | exonic   | 2 nonsynonymous | p.Tyr177Asp        | 525/276788=0.002  |
| GJB3  | NM_024009.3    | c.659A>T                          | exonic   | 2 nonsynonymous | p.Lys220Met        | 1/246042=0        |
| GJB3  | NM_024009.3    | c.670C>T                          | exonic   | 2 stopgain      | p.Arg224*          | 11/276538=0       |
| GJB4  | NM_153212.3    | c.119C>T                          | exonic   | 2 nonsynonymous | p.Ala40Val         | 13/277082=0       |
| GJB4  | NM_153212.3    | c.153delT                         | exonic   | 2 frameshift    | p.Phe51Leufs*57    | 1464/276392=0.005 |
| GJB4  | NM_153212.3    | c.254C>T                          | exonic   | 2 nonsynonymous | p.Thr85Met         | 8/245960=0        |
| GJB4  | NM_153212.3    | c.314A>G                          | exonic   | 2 nonsynonymous | p.His105Arg        | 10/277130=0       |
| GJB4  | NM_153212.3    | c.384G>A                          | exonic   | 2 stopgain      | p.Trp128*          | 527/277132=0.002  |
| GJB4  | NM_153212.3    | c.386G>A                          | exonic   | 2 stopgain      | p.Trp129*          | 59/277112=0       |
| GJB4  | NM_153212.3    | c.389C>T                          | exonic   | 2 nonsynonymous | p.Thr130Met        | 30/277058=0       |
| GJB4  | NM_153212.3    | c.478C>T                          | exonic   | 2 nonsynonymous | p.Arg160Cys        | 20/276732=0       |
| GJB4  | NM_153212.3    | c.770C>T                          | exonic   | 2 nonsynonymous | p.Ser257Leu        | 20/275366=0       |
| GJB6  | NM_001370092.1 | c.212T>C                          | exonic   | 5 nonsynonymous | p.Val71Ala         | 110/277050=0      |
| GJB6  | NM_001370092.1 | c.607A>G                          | exonic   | 5 nonsynonymous | p.Met203Val        | 247/277132=0.001  |
| GJB6  | NM_001370092.1 | c.688A>T                          | exonic   | 5 nonsynonymous | p.Asn230Tyr        |                   |
| KRT1  | NM_006121.4    | c.860T>C                          | exonic   | 3 nonsynonymous | p.Ile287Thr        | 1/246176=0        |
| KRT1  | NM_006121.4    | c.982A>T                          | exonic   | 5 nonsynonymous | p.Thr328Ser        | 332/277126=0.001  |
| KRT1  | NM_006121.4    | c.1294C>T                         | exonic   | 7 nonsynonymous | p.Arg432Cys        | 143/277212=0.001  |
| KRT1  | NM_006121.4    | c.1390G>A                         | exonic   | 7 nonsynonymous | p.Asp464Asn        | 1/246258=0        |
| KRT1  | NM_006121.4    | c.1693A>G                         | exonic   | 9 nonsynonymous | p.Ser565Gly        |                   |
| KRT1  | NM_006121.4    | c.1894G>A                         | exonic   | 9 nonsynonymous | p.Val632Met        | 2/245184=0        |
| KRT1  | NM_006121.4    | c.1912A>G                         | exonic   | 9 nonsynonymous | p.Thr638Ala        | 35/276622=0       |
| KRT10 | NM_001379366.1 | c.158G>A                          | exonic   | 1 nonsynonymous | p.Ser53Asn         | 65/276636=0       |
| KRT10 | NM_001379366.1 | c.257G>A                          | exonic   | 1 nonsynonymous | p.Arg86His         | 397/264258=0.002  |
| KRT10 | NM_001379366.1 | c.71G>A                           | exonic   | 1 nonsynonymous | p.Gly24Glu         | 34/179406=0       |
| KRT10 | NM_001379366.1 | c.98C>T                           | exonic   | 1 nonsynonymous | p.Ser33Phe         | 72/274952=0       |
| KRT10 | NM_001379366.1 | c.710+6T>C                        | intronic | 2               |                    | 5/277170=0        |
| KRT10 | NM_001379366.1 | c.1443_1457delAAGCTCCGGCGGCGGG    | exonic   | 7 inframe       | p.Ser482_Gly486del | 1/99466=0         |
| KRT10 | NM_001379366.1 | c.1471_1479delCACGGCGGC           | exonic   | 7 inframe       | p.His491_Gly493del |                   |
| KRT10 | NM_001379366.1 | c.1495T>C                         | exonic   | 7 nonsynonymous | p.Tyr499His        | 79/97856=0.001    |
| KRT10 | NM_001379366.1 | c.1524C>G                         | exonic   | 7 nonsynonymous | p.Ser508Arg        | 153/101426=0.002  |
| KRT10 | NM_001379366.1 | c.1650_1667delCAGCAGCTCCGGCGGCGGG | exonic   | 7 inframe       | p.Ser551_Gly556del | 34/219570=0       |
| KRT2  | NM_000423.3    | c.146G>A                          | exonic   | 1 nonsynonymous | p.Gly49Asp         | 3/242214=0        |
| KRT2  | NM_000423.3    | c.317G>A                          | exonic   | 1 nonsynonymous | p.Ser106Asn        | 641/254108=0.003  |
| KRT2  | NM_000423.3    | c.767A>G                          | exonic   | 2 nonsynonymous | p.Asn256Ser        | 110/277226=0      |

|          |                |            |          |                  |                 |                   |
|----------|----------------|------------|----------|------------------|-----------------|-------------------|
| KRT2     | NM_000423.3    | c.1550C>G  | exonic   | 9 nonsynonymous  | p.Ala517Gly     | 993/277108=0.004  |
| KRT2     | NM_000423.3    | c.1750A>G  | exonic   | 9 nonsynonymous  | p.Ile584Val     |                   |
| KRT9     | NM_000226.4    | c.245G>A   | exonic   | 1 nonsynonymous  | p.Ser82Asn      | 628/274158=0.002  |
| KRT9     | NM_000226.4    | c.49G>A    | exonic   | 1 nonsynonymous  | p.Gly17Ser      |                   |
| KRT9     | NM_000226.4    | c.1049C>G  | exonic   | 5 nonsynonymous  | p.Thr350Ser     |                   |
| KRT9     | NM_000226.4    | c.1630G>A  | exonic   | 7 nonsynonymous  | p.Gly544Arg     | 10/179160=0       |
| LIPN     | NM_001102469.1 | c.302delG  | exonic   | 3 frameshift     | p.Gly101Glufs*7 | 50/276298=0       |
| LIPN     | NM_001102469.1 | c.326A>C   | exonic   | 3 nonsynonymous  | p.Asp109Ala     | 2/245360=0        |
| LIPN     | NM_001102469.1 | c.633T>G   | exonic   | 5 nonsynonymous  | p.Ile211Met     | 12/275930=0       |
| LIPN     | NM_001102469.1 | c.754C>T   | exonic   | 6 nonsynonymous  | p.Leu252Phe     | 872/201394=0.004  |
| LIPN     | NM_001102469.1 | c.772G>A   | exonic   | 6 nonsynonymous  | p.Glu258Lys     | 316/215004=0.001  |
| LIPN     | NM_001102469.1 | c.934G>T   | exonic   | 8 nonsynonymous  | p.Asp312Tyr     | 1/152140=0        |
| NIPAL4   | NM_001099287.1 | c.176C>A   | exonic   | 1 nonsynonymous  | p.Ala59Asp      |                   |
| NIPAL4   | NM_001099287.1 | c.86C>A    | exonic   | 1 stopgain       | p.Ser29*        | 3/121822=0        |
| NIPAL4   | NM_001099287.1 | c.238C>A   | exonic   | 2 nonsynonymous  | p.Leu80Ile      |                   |
| NIPAL4   | NM_001099287.1 | c.296T>C   | exonic   | 2 nonsynonymous  | p.Val99Ala      | 783/277214=0.003  |
| NIPAL4   | NM_001099287.1 | c.397G>A   | exonic   | 2 nonsynonymous  | p.Gly133Ser     | 9/277110=0        |
| NIPAL4   | NM_001099287.1 | c.446C>T   | exonic   | 2 nonsynonymous  | p.Thr149Met     | 294/266230=0.001  |
| NIPAL4   | NM_001099287.1 | c.581C>T   | exonic   | 4 nonsynonymous  | p.Thr194Met     | 1/243716=0        |
| NIPAL4   | NM_001099287.1 | c.730G>T   | exonic   | 5 nonsynonymous  | p.Val244Phe     | 170/254010=0.001  |
| NIPAL4   | NM_001099287.1 | c.1105G>A  | exonic   | 6 nonsynonymous  | p.Val369Ile     | 127/276938=0      |
| NIPAL4   | NM_001099287.1 | c.839G>A   | exonic   | 6 nonsynonymous  | p.Arg280His     | 60/276956=0       |
| NIPAL4   | NM_001099287.1 | c.965G>A   | exonic   | 6 nonsynonymous  | p.Arg322Gln     | 10/246210=0       |
| PEX7     | NM_000288.4    | c.377A>C   | exonic   | 4 nonsynonymous  | p.Gln126Pr      | 1104/277164=0.004 |
| PEX7     | NM_000288.4    | c.961A>T   | exonic   | 10 nonsynonymous | p.Ile321Phe     |                   |
| PHYH     | NM_001323080.2 | c.56C>T    | exonic   | 4 nonsynonymous  | p.Thr19Met      | 367/277256=0.001  |
| PHYH     | NM_001323080.2 | c.301C>G   | exonic   | 6 nonsynonymous  | p.Arg101Gly     | 351/277160=0.001  |
| PHYH     | NM_001323080.2 | c.403G>A   | exonic   | 7 nonsynonymous  | p.Gly135Arg     | 2/246256=0        |
| PNPLA1   | NM_001374623.1 | c.116C>G   | exonic   | 1 nonsynonymous  | p.Ala39Gly      |                   |
| PNPLA1   | NM_001374623.1 | c.383C>T   | exonic   | 2 nonsynonymous  | p.Thr128Met     | 397/276794=0.001  |
| PNPLA1   | NM_001374623.1 | c.472T>A   | exonic   | 3 nonsynonymous  | p.Cys158Ser     |                   |
| PNPLA1   | NM_001374623.1 | c.592G>T   | exonic   | 4 nonsynonymous  | p.Asp198Tyr     |                   |
| PNPLA1   | NM_001374623.1 | c.714+7G>A | intronic | 4                |                 | 2/244890=0        |
| PNPLA1   | NM_001374623.1 | c.745G>A   | exonic   | 5 nonsynonymous  | p.Glu249Lys     | 813/277218=0.003  |
| PNPLA1   | NM_001374623.1 | c.922A>G   | exonic   | 6 nonsynonymous  | p.Thr308Ala     |                   |
| PNPLA1   | NM_001374623.1 | c.985T>C   | exonic   | 6 nonsynonymous  | p.Ser329Pro     | 615/276868=0.002  |
| PNPLA1   | NM_001374623.1 | c.1464T>A  | exonic   | 7 stopgain       | p.Tyr488*       | 3104/273832=0.011 |
| SERPINB7 | NM_003784.4    | c.220T>C   | exonic   | 4 nonsynonymous  | p.Ser74Pro      | 9/247468=0        |
| SERPINB7 | NM_003784.4    | c.715G>A   | exonic   | 7 nonsynonymous  | p.Val239Ile     | 20/276514=0       |
| SERPINB7 | NM_003784.4    | c.833A>G   | exonic   | 8 nonsynonymous  | p.Gln278Arg     | 42/275758=0       |
| SERPINB7 | NM_003784.4    | c.992A>C   | exonic   | 8 nonsynonymous  | p.Glu331Ala     | 113/276360=0      |
| SERPINB8 | NM_001366198.1 | c.254T>G   | exonic   | 3 nonsynonymous  | p.Leu85Trp      | 568/277052=0.002  |
| SERPINB8 | NM_001366198.1 | c.304C>T   | exonic   | 3 nonsynonymous  | p.Pro102Ser     | 352/276834=0.001  |
| SERPINB8 | NM_001366198.1 | c.1121C>T  | exonic   | 7 nonsynonymous  | p.Pro374Leu     | 9/273242=0        |
| SERPINB8 | NM_001366198.1 | c.866T>C   | exonic   | 7 nonsynonymous  | p.Ile289Thr     | 9/246270=0        |

|          |                |                   |          |    |               |              |                   |
|----------|----------------|-------------------|----------|----|---------------|--------------|-------------------|
| SERPINB8 | NM_001366198.1 | c.872C>G          | exonic   | 7  | nonsynonymous | p.Ala291Gly  | 60/277244=0       |
| SERPINB8 | NM_001366198.1 | c.988G>A          | exonic   | 7  | nonsynonymous | p.Ala330Thr  | 61/276742=0       |
| SNAP29   | NM_004782.4    | c.113C>T          | exonic   | 1  | nonsynonymous | p.Pro38Leu   | 139/246926=0.001  |
| SNAP29   | NM_004782.4    | c.130T>C          | exonic   | 1  | nonsynonymous | p.Tyr44His   | 649/251920=0.003  |
| SLC27A4  | NM_005094.4    | c.250G>A          | exonic   | 3  | nonsynonymous | p.Val84Ile   | 2/245924=0        |
| SLC27A4  | NM_005094.4    | c.742G>A          | exonic   | 5  | nonsynonymous | p.Gly248Ser  |                   |
| SLC27A4  | NM_005094.4    | c.952C>T          | exonic   | 7  | nonsynonymous | p.Arg318Trp  | 28/277118=0       |
| SLC27A4  | NM_005094.4    | c.1300G>A         | exonic   | 9  | nonsynonymous | p.Gly434Ser  | 9/245968=0        |
| SLC27A4  | NM_005094.4    | c.1415_1417delAGA | exonic   | 10 | inframe       | p.Lys472del  | 8/245700=0        |
| SLC27A4  | NM_005094.4    | c.1788C>G         | exonic   | 13 | nonsynonymous | p.Phe596Leu  | 3/246250=0        |
| SPINK5   | NM_001127698.2 | c.677A>G          | exonic   | 9  | nonsynonymous | p.Lys226Arg  | 8/276568=0        |
| SPINK5   | NM_001127698.2 | c.1362G>C         | exonic   | 15 | nonsynonymous | p.Glu454Asp  | 1/245736=0        |
| SPINK5   | NM_001127698.2 | c.1451G>A         | exonic   | 16 | nonsynonymous | p.Arg484Lys  | 343/276350=0.001  |
| SPINK5   | NM_001127698.2 | c.1552C>T         | exonic   | 17 | nonsynonymous | p.Arg518Cys  | 879/277134=0.003  |
| SPINK5   | NM_001127698.2 | c.1964G>A         | exonic   | 21 | nonsynonymous | p.Gly655Asp  | 760/276990=0.003  |
| SPINK5   | NM_001127698.2 | c.2243A>G         | exonic   | 24 | nonsynonymous | p.Glu748Gly  | 800/276940=0.003  |
| SPINK5   | NM_001127698.2 | c.2852A>G         | exonic   | 30 | nonsynonymous | p.Asn951Ser  | 1264/277148=0.005 |
| SPINK5   | NM_001127698.2 | c.2954T>C         | exonic   | 30 | nonsynonymous | p.Val985Ala  | 982/276828=0.004  |
| SPINK5   | NM_001127698.2 | c.3167T>G         | exonic   | 32 | nonsynonymous | p.Met1056Arg | 26/246178=0       |
| SPINK5   | NM_001127698.2 | c.3256G>A         | exonic   | 33 | nonsynonymous | p.Ala1086Thr | 9/277070=0        |
| ST14     | NM_021978.4    | c.145A>T          | exonic   | 2  | stopgain      | p.Lys49*     |                   |
| ST14     | NM_021978.4    | c.454A>G          | exonic   | 5  | nonsynonymous | p.Ile152Val  | 876/276060=0.003  |
| ST14     | NM_021978.4    | c.508G>A          | exonic   | 5  | nonsynonymous | p.Glu170Lys  | 521/276770=0.002  |
| ST14     | NM_021978.4    | c.800C>A          | exonic   | 7  | nonsynonymous | p.Ser267Tyr  | 2/240850=0        |
| ST14     | NM_021978.4    | c.830C>T          | exonic   | 7  | nonsynonymous | p.Thr277Met  | 168/254380=0.001  |
| ST14     | NM_021978.4    | c.967C>T          | exonic   | 8  | nonsynonymous | p.Arg323Trp  | 2/246262=0        |
| ST14     | NM_021978.4    | c.1034G>A         | exonic   | 9  | nonsynonymous | p.Arg345His  | 302/277184=0.001  |
| ST14     | NM_021978.4    | c.1975A>G         | exonic   | 16 | nonsynonymous | p.Ile659Val  | 33/245026=0       |
| ST14     | NM_021978.4    | c.2146G>C         | exonic   | 17 | nonsynonymous | p.Glu716Gln  |                   |
| ST14     | NM_021978.4    | c.2406+4G>C       | intronic | 18 |               |              | 193/212654=0.001  |
| ST14     | NM_021978.4    | c.2553G>C         | exonic   | 19 | nonsynonymous | p.Glu851Asp  | 6/276830=0        |
| STS      | NM_001320751.2 | c.478C>T          | exonic   | 7  | nonsynonymous | p.His160Tyr  |                   |
| STS      | NM_001320751.2 | c.1147A>G         | exonic   | 10 | nonsynonymous | p.Ile383Val  | 9/178456=0        |
| STS      | NM_001320751.2 | c.1168C>T         | exonic   | 10 | nonsynonymous | p.Arg390Cys  | 4/178511=0        |
| STS      | NM_001320751.2 | c.1274A>G         | exonic   | 10 | nonsynonymous | p.Asp425Gly  | 184/199731=0.001  |
| SULT2B1  | NM_004605.2    | c.107T>C          | exonic   | 1  | nonsynonymous | p.Leu36Ser   | 1287/274634=0.005 |
| SULT2B1  | NM_004605.2    | c.232C>T          | exonic   | 2  | nonsynonymous | p.Arg78Cys   | 252/276636=0.001  |
| SULT2B1  | NM_004605.2    | c.600+3G>A        | intronic | 4  |               |              |                   |
| SULT2B1  | NM_004605.2    | c.673G>A          | exonic   | 5  | nonsynonymous | p.Val225Ile  | 220/272762=0.001  |
| SULT2B1  | NM_004605.2    | c.668G>A          | exonic   | 5  | nonsynonymous | p.Gly223Asp  | 3/272700=0        |
| SULT2B1  | NM_004605.2    | c.1045C>T         | exonic   | 6  | nonsynonymous | p.Pro349Ser  | 100/144788=0.001  |
| SULT2B1  | NM_004605.2    | c.867G>A          | exonic   | 6  | nonsynonymous | p.Met289Ile  | 270/262312=0.001  |
| SUMF1    | NM_182760.4    | c.131G>A          | exonic   | 1  | nonsynonymous | p.Gly44Glu   |                   |
| SUMF1    | NM_182760.4    | c.59T>G           | exonic   | 1  | nonsynonymous | p.Leu20Ar    | 988/267246=0.004  |
| SUMF1    | NM_182760.4    | c.664G>C          | exonic   | 5  | nonsynonymous | p.Gly222Arg  | 450/277142=0.002  |

|          |             |                  |          |                  |                  |                  |
|----------|-------------|------------------|----------|------------------|------------------|------------------|
| SUMF1    | NM_182760.4 | c.935T>C         | exonic   | 7 nonsynonymous  | p.Val312Ala      |                  |
| TGM1     | NM_000359.3 | c.208G>T         | exonic   | 2 nonsynonymous  | p.Gly70Cys       |                  |
| TGM1     | NM_000359.3 | c.61A>G          | exonic   | 2 nonsynonymous  | p.Thr21Ala       | 372/276110=0.001 |
| TGM1     | NM_000359.3 | c.90_95dupGCCAGA | exonic   | 2 inframe        | p.Glu30_Pro31dup | 132/276714=0     |
| TGM1     | NM_000359.3 | c.359C>T         | exonic   | 3 nonsynonymous  | p.Ser120Leu      | 7/245944=0       |
| TGM1     | NM_000359.3 | c.746C>T         | exonic   | 4 nonsynonymous  | p.Pro249Leu      |                  |
| TGM1     | NM_000359.3 | c.550C>T         | exonic   | 4 nonsynonymous  | p.Pro184Ser      | 183/277094=0.001 |
| TGM1     | NM_000359.3 | c.680A>G         | exonic   | 4 nonsynonymous  | p.Gln227Arg      |                  |
| TGM1     | NM_000359.3 | c.920G>A         | exonic   | 6 nonsynonymous  | p.Arg307Gln      | 124/275156=0     |
| TGM1     | NM_000359.3 | c.1492-19T>A     | intronic | 11               |                  | 7/245872=0       |
| TGM1     | NM_000359.3 | c.1717C>T        | exonic   | 12 nonsynonymous | p.Arg573Trp      | 7/277016=0       |
| TGM1     | NM_000359.3 | c.2338G>A        | exonic   | 15 nonsynonymous | p.Gly780Ser      | 1/246154=0       |
| TGM1     | NM_000359.3 | c.2405A>T        | exonic   | 15 nonsynonymous | p.Asp802Val      | 262/277042=0.001 |
| VPS33B   | NM_018668.4 | c.97-3C>T        | intronic | 2                |                  |                  |
| ZMPSTE24 | NM_005857.3 | c.1106G>A        | exonic   | 9 nonsynonymous  | p.Arg369Gln      | 199/277132=0.001 |
| ZMPSTE24 | NM_005857.3 | c.1235G>A        | exonic   | 10 nonsynonymous | p.Arg412His      | 11/246164=0      |
| VPS33B   | NM_018668.4 | c.1166G>A        | exonic   | 15 nonsynonymous | p.Arg389Gln      | 590/277118=0.002 |
| VPS33B   | NM_018668.4 | c.1274G>A        | exonic   | 18 nonsynonymous | p.Ser425Asn      | 350/277058=0.001 |
| VPS33B   | NM_018668.4 | c.1307A>G        | exonic   | 18 nonsynonymous | p.Asn436Ser      | 15/277084=0      |
| VPS33B   | NM_018668.4 | c.1837A>T        | exonic   | 23 nonsynonymous | p.Ser613Cys      |                  |
