# Supplementary material for: Comprehensive Molecular Analysis of Disease-Related Genes as First-Tier Test for Early Diagnosis, Classification, and Management of Patients Affected by Nonsyndromic Ichthyosis
Source: MDPI journal article supplement (doi:10.3390/biomedicines12051112), 2024-05-17
Supplement: s1 [file s1]

Table S4. Subjects with at least one rare variant in ichthyosis-related genes among 300 unaffected individuals

| Subject ID | GENE     | GenBank #      | Nucleotide variant | gene position | Exon | Presumed effect | Presumed protein variant | gnomAD frequency  |
|------------|----------|----------------|--------------------|---------------|------|-----------------|--------------------------|-------------------|
| 1          | NIPAL4   | NM_001099287.1 | c.1105G>A          | exonic        | 6    | nonsynonymous   | p.Val369Ile              | 127/276938=0      |
| 2          | NIPAL4   | NM_001099287.1 | c.86C>A            | exonic        | 1    | stopgain        | p.Ser29*                 | 3/121822=0        |
| 3          | CAST     | NM_001750.7    | c.200C>T           | exonic        | 3    | nonsynonymous   | p.Ser67Leu               | 12/276074=0       |
| 3          | GJB4     | NM_153212.3    | c.119C>T           | exonic        | 2    | nonsynonymous   | p.Ala40Val               | 13/277082=0       |
| 4          | ALOXE3   | NM_001165960.1 | c.62C>T            | exonic        | 1    | nonsynonymous   | p.Pro21Leu               | 16/168304=0       |
| 4          | CERS3    | NM_001290341.2 | c.233C>T           | exonic        | 6    | nonsynonymous   | p.Ser78Leu               |                   |
| 4          | ST14     | NM_021978.4    | c.508G>A           | exonic        | 5    | nonsynonymous   | p.Glu170Lys              | 521/276770=0.002  |
| 5          | ABCA12   | NM_173076.3    | c.3098T>C          | exonic        | 22   | nonsynonymous   | p.Ile1033Thr             | 2/245894=0        |
| 5          | TGM1     | NM_000359.3    | c.359C>T           | exonic        | 3    | nonsynonymous   | p.Ser120Leu              | 7/245944=0        |
| 6          | GJB2     | NM_004004.6    | c.35delG           | exonic        | 2    | frameshift      | p.Gly12Valfs*2           | 1721/275002=0.006 |
| 6          | PNPLA1   | NM_001374623.1 | c.1464T>A          | exonic        | 7    | stopgain        | p.Tyr488*                | 3104/273832=0.011 |
| 7          | ABCA12   | NM_173076.3    | c.2129A>G          | exonic        | 17   | nonsynonymous   | p.Tyr710Cys              | 1/246028=0        |
| 7          | GJB3     | NM_024009.3    | c.422T>C           | exonic        | 2    | nonsynonymous   | p.Ile141Thr              |                   |
| 8          | GJB2     | NM_004004.6    | c.88A>G            | exonic        | 2    | nonsynonymous   | p.Ile30Val               |                   |
| 9          | CAST     | NM_001750.7    | c.1207G>C          | exonic        | 17   | nonsynonymous   | p.Ala403Pro              | 1334/276854=0.005 |
| 9          | GJB3     | NM_024009.3    | c.529T>G           | exonic        | 2    | nonsynonymous   | p.Tyr177Asp              | 525/276788=0.002  |
| 9          | LIPN     | NM_001102469.1 | c.754C>T           | exonic        | 6    | nonsynonymous   | p.Leu252Phe              | 872/201394=0.004  |
| 9          | PNPLA1   | NM_001374623.1 | c.383C>T           | exonic        | 2    | nonsynonymous   | p.Thr128Met              | 397/276794=0.001  |
| 9          | SPINK5   | NM_001127698.2 | c.1552C>T          | exonic        | 17   | nonsynonymous   | p.Arg518Cys              | 879/277134=0.003  |
| 10         | KRT1     | NM_006121.4    | c.1294C>T          | exonic        | 7    | nonsynonymous   | p.Arg432Cys              | 143/277212=0.001  |
| 10         | SERPINB8 | NM_001366198.1 | c.304C>T           | exonic        | 3    | nonsynonymous   | p.Pro102Ser              | 352/276834=0.001  |
| 10         | ST14     | NM_021978.4    | c.830C>T           | exonic        | 7    | nonsynonymous   | p.Thr277Met              | 168/254380=0.001  |
| 11         | KRT1     | NM_006121.4    | c.860T>C           | exonic        | 3    | nonsynonymous   | p.Ile287Thr              | 1/246176=0        |
| 11         | SPINK5   | NM_001127698.2 | c.3256G>A          | exonic        | 33   | nonsynonymous   | p.Ala1086Thr             | 9/277070=0        |
| 12         | CAST     | NM_001750.7    | c.1835A>G          | exonic        | 25   | nonsynonymous   | p.Lys612Arg              | 585/265502=0.002  |
| 12         | GJB2     | NM_004004.6    | c.101T>C           | exonic        | 2    | nonsynonymous   | p.Met34Thr               | 2487/276420=0.009 |
| 12         | KRT10    | NM_001379366.1 | c.1495T>C          | exonic        | 7    | nonsynonymous   | p.Tyr499His              | 79/97856=0.001    |
| 13         | ALOXE3   | NM_001165960.1 | c.30G>T            | exonic        | 1    | nonsynonymous   | p.Leu10Phe               |                   |
| 14         | ABCA12   | NM_173076.3    | c.2243G>A          | exonic        | 17   | nonsynonymous   | p.Arg748Lys              | 6/245968=0        |
| 15         | ABCA12   | NM_173076.3    | c.1816G>A          | exonic        | 15   | nonsynonymous   | p.Asp606Asn              | 2/245978=0        |
| 16         | CDSN     | NM_001264.4    | c.32G>A            | exonic        | 1    | nonsynonymous   | p.Arg11His               | 790/239488=0.003  |
| 16         | SLC27A4  | NM_005094.4    | c.1415_1417delAGA  | exonic        | 10   | inframe         | p.Lys472del              | 8/245700=0        |
| 17         | GJB2     | NM_004004.6    | c.101T>C           | exonic        | 2    | nonsynonymous   | p.Met34Thr               | 2487/276420=0.009 |
| 18         | PNPLA1   | NM_001374623.1 | c.1464T>A          | exonic        | 7    | stopgain        | p.Tyr488*                | 3104/273832=0.011 |
| 19         | GJB4     | NM_153212.3    | c.254C>T           | exonic        | 2    | nonsynonymous   | p.Thr85Met               | 8/245960=0        |
| 19         | PNPLA1   | NM_001374623.1 | c.745G>A           | exonic        | 5    | nonsynonymous   | p.Glu249Lys              | 813/277218=0.003  |
| 20         | GJB2     | NM_004004.6    | c.457G>A           | exonic        | 2    | nonsynonymous   | p.Val153Ile              | 2433/276862=0.009 |
| 21         | KRT10    | NM_001379366.1 | c.257G>A           | exonic        | 1    | nonsynonymous   | p.Arg86His               | 397/264258=0.002  |
| 22         | GJB2     | NM_004004.6    | c.109G>A           | exonic        | 2    | nonsynonymous   | p.Val37Ile               | 2011/276450=0.007 |
| 22         | KRT2     | NM_000423.3    | c.146G>A           | exonic        | 1    | nonsynonymous   | p.Gly49Asp               | 3/242214=0        |
| 23         | CERS3    | NM_001290341.2 | c.1151G>A          | exonic        | 14   | nonsynonymous   | p.Arg384Lys              | 481/277162=0.002  |
| 23         | KRT10    | NM_001379366.1 | c.1524C>G          | exonic        | 7    | nonsynonymous   | p.Ser508Arg              | 153/101426=0.002  |
| 24         | GJB3     | NM_024009.3    | c.316C>T           | exonic        | 2    | nonsynonymous   | p.Arg106Cys              | 40/276618=0       |

|    |          |                |                 |        |    |               |                |                   |
|----|----------|----------------|-----------------|--------|----|---------------|----------------|-------------------|
| 24 | SULT2B1  | NM_004605.2    | c.668G>A        | exonic | 5  | nonsynonymous | p.Gly223Asp    | 3/272700=0        |
| 25 | GJA1     | NM_000165.5    | c.1108C>T       | exonic | 2  | nonsynonymous | p.Arg370Cys    | 3/245356=0        |
| 25 | GJB6     | NM_001370092.1 | c.688A>T        | exonic | 5  | nonsynonymous | p.Asn230Tyr    |                   |
| 25 | SULT2B1  | NM_004605.2    | c.867G>A        | exonic | 6  | nonsynonymous | p.Met289Ile    | 270/262312=0.001  |
| 26 | ALOX12B  | NM_001139.3    | c.380C>T        | exonic | 3  | nonsynonymous | p.Pro127Leu    | 66/276792=0       |
| 27 | KRT2     | NM_000423.3    | c.1550C>G       | exonic | 9  | nonsynonymous | p.Ala517Gly    | 993/277108=0.004  |
| 28 | PNPLA1   | NM_001374623.1 | c.745G>A        | exonic | 5  | nonsynonymous | p.Glu249Lys    | 813/277218=0.003  |
| 29 | ABCA12   | NM_173076.3    | c.6208G>A       | exonic | 42 | nonsynonymous | p.Val2070Ile   | 514/276952=0.002  |
| 30 | PNPLA1   | NM_001374623.1 | c.1464T>A       | exonic | 7  | stopgain      | p.Tyr488*      | 3104/273832=0.011 |
| 31 | CLDN1    | NM_021101.5    | c.631G>A        | exonic | 4  | nonsynonymous | p.Val211Met    | 30/277152=0       |
| 32 | GJA1     | NM_000165.5    | c.1109G>A       | exonic | 2  | nonsynonymous | p.Arg370His    | 1/245340=0        |
| 33 | KRT2     | NM_000423.3    | c.1550C>G       | exonic | 9  | nonsynonymous | p.Ala517Gly    | 993/277108=0.004  |
| 34 | GJB4     | NM_153212.3    | c.770C>T        | exonic | 2  | nonsynonymous | p.Ser257Leu    | 20/275366=0       |
| 34 | KRT1     | NM_006121.4    | c.982A>T        | exonic | 5  | nonsynonymous | p.Thr328Ser    | 332/277126=0.001  |
| 35 | GJB2     | NM_004004.6    | c.35delG        | exonic | 2  | frameshift    | p.Gly12Valfs*2 | 1721/275002=0.006 |
| 35 | TGM1     | NM_000359.3    | c.1717C>T       | exonic | 12 | nonsynonymous | p.Arg573Trp    | 7/277016=0        |
| 36 | ABCA12   | NM_173076.3    | c.5617G>A       | exonic | 37 | nonsynonymous | p.Val1873Ile   | 670/276578=0.002  |
| 36 | GJB2     | NM_004004.6    | c.269T>C        | exonic | 2  | nonsynonymous | p.Leu90Pro     | 177/277032=0.001  |
| 37 | CDSN     | NM_001264.4    | c.475A>G        | exonic | 2  | nonsynonymous | p.Ser159Gly    | 47/276174=0       |
| 38 | KRT9     | NM_000226.4    | c.245G>A        | exonic | 1  | nonsynonymous | p.Ser82Asn     | 628/274158=0.002  |
| 39 | KRT9     | NM_000226.4    | c.245G>A        | exonic | 1  | nonsynonymous | p.Ser82Asn     | 628/274158=0.002  |
| 40 | ALDH3A2  | NM_001031806.2 | c.1270C>T       | exonic | 9  | nonsynonymous | p.Pro424Ser    | 1205/277210=0.004 |
| 41 | ABCA12   | NM_173076.3    | c.5051T>C       | exonic | 33 | nonsynonymous | p.Ile1684Thr   | 4/245586=0        |
| 42 | GJB2     | NM_004004.6    | c.457G>A        | exonic | 2  | nonsynonymous | p.Val153Ile    | 2433/276862=0.009 |
| 42 | TGM1     | NM_000359.3    | c.920G>A        | exonic | 6  | nonsynonymous | p.Arg307Gln    | 124/275156=0      |
| 43 | ST14     | NM_021978.4    | c.454A>G        | exonic | 5  | nonsynonymous | p.Ile152Val    | 876/276060=0.003  |
| 44 | PNPLA1   | NM_001374623.1 | c.745G>A        | exonic | 5  | nonsynonymous | p.Glu249Lys    | 813/277218=0.003  |
| 44 | PNPLA1   | NM_001374623.1 | c.1464T>A       | exonic | 7  | stopgain      | p.Tyr488*      | 3104/273832=0.011 |
| 45 | ALOXE3   | NM_001165960.1 | c.280C>G        | exonic | 2  | nonsynonymous | p.Pro94Ala     | 143/182810=0.001  |
| 45 | CAST     | NM_001750.7    | c.1835A>G       | exonic | 25 | nonsynonymous | p.Lys612Arg    | 585/265502=0.002  |
| 45 | SNAP29   | NM_004782.4    | c.130T>C        | exonic | 1  | nonsynonymous | p.Tyr44His     | 649/251920=0.003  |
| 45 | SPINK5   | NM_001127698.2 | c.2852A>G       | exonic | 30 | nonsynonymous | p.Asn951Ser    | 1264/277148=0.005 |
| 46 | GJB4     | NM_153212.3    | c.478C>T        | exonic | 2  | nonsynonymous | p.Arg160Cys    | 20/276732=0       |
| 46 | PNPLA1   | NM_001374623.1 | c.1464T>A       | exonic | 7  | stopgain      | p.Tyr488*      | 3104/273832=0.011 |
| 47 | ALDH3A2  | NM_001031806.2 | c.17G>C         | exonic | 1  | nonsynonymous | p.Arg6Pro      | 3/223156=0        |
| 48 | SPINK5   | NM_001127698.2 | c.1964G>A       | exonic | 21 | nonsynonymous | p.Gly655Asp    | 760/276990=0.003  |
| 49 | ABCA12   | NM_173076.3    | c.4618G>T       | exonic | 31 | nonsynonymous | p.Ala1540Ser   | 9/245910=0        |
| 50 | LIPN     | NM_001102469.1 | c.326A>C        | exonic | 3  | nonsynonymous | p.Asp109Ala    | 2/245360=0        |
| 50 | SERPINB8 | NM_001366198.1 | c.872C>G        | exonic | 7  | nonsynonymous | p.Ala291Gly    | 60/277244=0       |
| 51 | PEX7     | NM_000288.4    | c.377A>C        | exonic | 4  | nonsynonymous | p.Gln126Pr     | 1104/277164=0.004 |
| 52 | CYP4F22  | NM_173483.4    | c.485C>G        | exonic | 6  | nonsynonymous | p.Ala162Gly    | 47/277122=0       |
| 52 | SPINK5   | NM_001127698.2 | c.3167T>G       | exonic | 32 | nonsynonymous | p.Met1056Arg   | 26/246178=0       |
| 53 | KRT10    | NM_001379366.1 | c.98C>T         | exonic | 1  | nonsynonymous | p.Ser33Phe     | 72/274952=0       |
| 54 | ABCA12   | NM_173076.3    | c.3481A>T       | exonic | 24 | nonsynonymous | p.Met1161Leu   | 363/277160=0.001  |
| 54 | GJB3     | NM_024009.3    | c.196_198delGAC | exonic | 2  | inframe       | p.Asp66del     | 38/277154=0       |
| 55 | ABCA12   | NM_173076.3    | c.3481A>T       | exonic | 24 | nonsynonymous | p.Met1161Leu   | 363/277160=0.001  |

|    |          |                |              |          |    |               |                |                   |
|----|----------|----------------|--------------|----------|----|---------------|----------------|-------------------|
| 55 | ALDH3A2  | NM_001031806.2 | c.17G>C      | exonic   | 2  | nonsynonymous | p.Arg6Pro      | 3/223156=0        |
| 56 | NIPAL4   | NM_001099287.1 | c.965G>A     | exonic   | 6  | nonsynonymous | p.Arg322Gln    | 10/246210=0       |
| 57 | PNPLA1   | NM_001374623.1 | c.1464T>A    | exonic   | 7  | stopgain      | p.Tyr488*      | 3104/273832=0.011 |
| 58 | NIPAL4   | NM_001099287.1 | c.238C>A     | exonic   | 2  | nonsynonymous | p.Leu80Ile     |                   |
| 58 | PNPLA1   | NM_001374623.1 | c.592G>T     | exonic   | 4  | nonsynonymous | p.Asp198Tyr    |                   |
| 59 | CYP4F22  | NM_173483.4    | c.1148C>T    | exonic   | 11 | nonsynonymous | p.Thr383Ile    |                   |
| 59 | TGM1     | NM_000359.3    | c.61A>G      | exonic   | 2  | nonsynonymous | p.Thr21Ala     | 372/276110=0.001  |
| 60 | CDSN     | NM_001264.4    | c.475A>G     | exonic   | 2  | nonsynonymous | p.Ser159Gly    | 47/276174=0       |
| 61 | ELOVL4   | NM_022726.4    | c.800T>C     | exonic   | 6  | nonsynonymous | p.Ile267Thr    | 2004/276984=0.007 |
| 61 | TGM1     | NM_000359.3    | c.680A>G     | exonic   | 4  | nonsynonymous | p.Gln227Arg    |                   |
| 62 | ABCA12   | NM_173076.3    | c.3481A>T    | exonic   | 24 | nonsynonymous | p.Met1161Leu   | 363/277160=0.001  |
| 62 | PNPLA1   | NM_001374623.1 | c.922A>G     | exonic   | 6  | nonsynonymous | p.Thr308Ala    |                   |
| 63 | GJA1     | NM_000165.5    | c.758C>T     | exonic   | 2  | nonsynonymous | p.Ala253Val    | 2227/277148=0.008 |
| 64 | CYP4F22  | NM_173483.4    | c.712G>A     | exonic   | 8  | nonsynonymous | p.Ala238Thr    |                   |
| 64 | KRT9     | NM_000226.4    | c.1049C>G    | exonic   | 5  | nonsynonymous | p.Thr350Ser    |                   |
| 64 | NIPAL4   | NM_001099287.1 | c.446C>T     | exonic   | 2  | nonsynonymous | p.Thr149Met    | 294/266230=0.001  |
| 64 | SULT2B1  | NM_004605.2    | c.1045C>T    | exonic   | 6  | nonsynonymous | p.Pro349Ser    | 100/144788=0.001  |
| 65 | ABCA12   | NM_173076.3    | c.7631C>T    | exonic   | 52 | nonsynonymous | p.Thr2544Ile   | 379/276596=0.001  |
| 65 | SLC27A4  | NM_005094.4    | c.250G>A     | exonic   | 3  | nonsynonymous | p.Val84Ile     | 2/245924=0        |
| 65 | SPINK5   | NM_001127698.2 | c.677A>G     | exonic   | 9  | nonsynonymous | p.Lys226Arg    | 8/276568=0        |
| 66 | ABHD5    | NM_001365649.1 | c.22A>G      | exonic   | 3  | nonsynonymous | p.Thr8Ala      | 12/237020=0       |
| 67 | ELOVL4   | NM_022726.4    | c.243C>G     | exonic   | 2  | nonsynonymous | p.Ile81Met     |                   |
| 68 | ALOX12B  | NM_001139.3    | c.556A>T     | exonic   | 5  | nonsynonymous | p.Ile186Phe    | 0                 |
| 69 | SERPINB8 | NM_001366198.1 | c.866T>C     | exonic   | 7  | nonsynonymous | p.Ile289Thr    | 9/246270=0        |
| 70 | GJB2     | NM_004004.6    | c.101T>C     | exonic   | 2  | nonsynonymous | p.Met34Thr     | 2487/276420=0.009 |
| 71 | GJB2     | NM_004004.6    | c.35delG     | exonic   | 2  | frameshift    | p.Gly12Valfs*2 | 1721/275002=0.006 |
| 72 | CAST     | NM_001750.7    | c.986C>G     | exonic   | 14 | nonsynonymous | p.Ala329Gly    | 74/276982=0       |
| 72 | CERS3    | NM_001290341.2 | c.914A>G     | exonic   | 13 | nonsynonymous | p.His305Arg    | 3292/264968=0.012 |
| 73 | KRT9     | NM_000226.4    | c.245G>A     | exonic   | 1  | nonsynonymous | p.Ser82Asn     | 628/274158=0.002  |
| 74 | ABCA12   | NM_173076.3    | c.346G>T     | exonic   | 4  | nonsynonymous | p.Asp116Tyr    | 7/245398=0        |
| 74 | ABHD5    | NM_001365649.1 | c.22A>G      | exonic   | 3  | nonsynonymous | p.Thr8Ala      | 12/237020=0       |
| 75 | SULT2B1  | NM_004605.2    | c.673G>A     | exonic   | 5  | nonsynonymous | p.Val225Ile    | 220/272762=0.001  |
| 76 | ALDH3A2  | NM_001031806.2 | c.661G>A     | exonic   | 4  | nonsynonymous | p.Asp221Asn    | 1/244348=0        |
| 76 | TGM1     | NM_000359.3    | c.746C>T     | exonic   | 4  | nonsynonymous | p.Pro249Leu    | NUOVA             |
| 77 | ABCA12   | NM_173076.3    | c.1222T>C    | exonic   | 11 | nonsynonymous | p.Ser408Pro    | 322/276876=0.001  |
| 77 | CDSN     | NM_001264.4    | c.1302C>A    | exonic   | 2  | nonsynonymous | p.Ser434Arg    | 916/276996=0.003  |
| 77 | GJB2     | NM_004004.6    | c.457G>A     | exonic   | 2  | nonsynonymous | p.Val153Ile    | 2433/276862=0.009 |
| 77 | KRT1     | NM_006121.4    | c.1894G>A    | exonic   | 9  | nonsynonymous | p.Val632Met    | 2/245184=0        |
| 77 | TGM1     | NM_000359.3    | c.1492-19T>A | intronic | 11 |               |                | 7/245872=0        |
| 78 | PNPLA1   | NM_001374623.1 | c.1464T>A    | exonic   | 7  | stopgain      | p.Tyr488*      | 3104/273832=0.011 |
| 79 | GJB2     | NM_004004.6    | c.457G>A     | exonic   | 2  | nonsynonymous | p.Val153Ile    | 2433/276862=0.009 |
| 80 | ALOX12B  | NM_001139.3    | c.1156C>T    | exonic   | 9  | nonsynonymous | p.Arg386Cys    | 9/276770=0        |
| 81 | CYP4F22  | NM_173483.4    | c.109C>T     | exonic   | 3  | nonsynonymous | p.Arg37Cys     | 32/121338=0       |
| 82 | SPINK5   | NM_001127698.2 | c.1451G>A    | exonic   | 16 | nonsynonymous | p.Arg484Lys    | 343/276350=0.001  |
| 83 | LIPN     | NM_001102469.1 | c.772G>A     | exonic   | 6  | nonsynonymous | p.Glu258Lys    | 316/215004=0.001  |
| 83 | PNPLA1   | NM_001374623.1 | c.745G>A     | exonic   | 5  | nonsynonymous | p.Glu249Lys    | 813/277218=0.003  |

|     |          |                |                         |          |    |               |                    |                   |
|-----|----------|----------------|-------------------------|----------|----|---------------|--------------------|-------------------|
| 84  | GJB2     | NM_004004.6    | c.35delG                | exonic   | 2  | frameshift    | p.Gly12Valfs*2     | 1721/275002=0.006 |
| 84  | PNPLA1   | NM_001374623.1 | c.1464T>A               | exonic   | 7  | stopgain      | p.Tyr488*          | 3104/273832=0.011 |
| 85  | PNPLA1   | NM_001374623.1 | c.745G>A                | exonic   | 5  | nonsynonymous | p.Glu249Lys        | 803/138609=0.006  |
| 86  | CERS3    | NM_001290341.2 | c.914A>G                | exonic   | 13 | nonsynonymous | p.His305Arg        | 3292/264968=0.012 |
| 86  | GJB4     | NM_153212.3    | c.254C>T                | exonic   | 2  | nonsynonymous | p.Thr85Met         | 8/245960=0        |
| 87  | LIPN     | NM_001102469.1 | c.934G>T                | exonic   | 8  | nonsynonymous | p.Asp312Tyr        | 1/152140=0        |
| 88  | GJB2     | NM_004004.6    | c.101T>C                | exonic   | 2  | nonsynonymous | p.Met34Thr         | 2487/276420=0.009 |
| 88  | KRT10    | NM_001379366.1 | c.1471_1479delCACGGCGGC | exonic   | 7  | inframe       | p.His491_Gly493del |                   |
| 89  | ABCA12   | NM_173076.3    | c.1222T>C               | exonic   | 11 | nonsynonymous | p.Ser408Pro        | 322/276876=0.001  |
| 89  | ABCA12   | NM_173076.3    | c.1475A>G               | exonic   | 12 | nonsynonymous | p.Asn492Ser        | 5/276916=0        |
| 89  | ALDH3A2  | NM_001031806.2 | c.119A>G                | exonic   | 1  | nonsynonymous | p.Asp40Gly         | 155/218008=0.001  |
| 90  | SPINK5   | NM_001127698.2 | c.2243A>G               | exonic   | 24 | nonsynonymous | p.Glu748Gly        | 800/276940=0.003  |
| 91  | SPINK5   | NM_001127698.2 | c.1964G>A               | exonic   | 21 | nonsynonymous | p.Gly655Asp        | 760/276990=0.003  |
| 92  | TGM1     | NM_000359.3    | c.2338G>A               | exonic   | 15 | nonsynonymous | p.Gly780Ser        | 1/246154=0        |
| 93  | ALOX12B  | NM_001139.3    | c.1565C>T               | exonic   | 12 | nonsynonymous | p.Pro522Leu        | 277/277210=0.001  |
| 94  | CYP4F22  | NM_173483.4    | c.68C>T                 | exonic   | 3  | nonsynonymous | p.Ala23Val         | 45/277126=0       |
| 95  | ALOXE3   | NM_001165960.1 | c.809G>A                | exonic   | 4  | nonsynonymous | p.Arg270Gln        | 7/246260=0        |
| 95  | PNPLA1   | NM_001374623.1 | c.1464T>A               | exonic   | 7  | stopgain      | p.Tyr488*          | 3104/273832=0.011 |
| 96  | ABHD5    | NM_001365649.1 | c.883G>T                | exonic   | 7  | stopgain      | p.Glu295*          | 1/121404=0        |
| 97  | SERPINB7 | NM_003784.4    | c.833A>G                | exonic   | 8  | nonsynonymous | p.Gln278Arg        | 42/275758=0       |
| 97  | SPINK5   | NM_001127698.2 | c.2243A>G               | exonic   | 24 | nonsynonymous | p.Glu748Gly        | 800/276940=0.003  |
| 98  | CAST     | NM_001750.7    | c.775A>G                | exonic   | 11 | nonsynonymous | p.Thr259Ala        | 943/276512=0.003  |
| 98  | CAST     | NM_001750.7    | c.925A>C                | exonic   | 14 | nonsynonymous | p.Ile309Leu        | 2994/276670=0.011 |
| 98  | CDSN     | NM_001264.4    | c.32G>A                 | exonic   | 1  | nonsynonymous | p.Arg11His         | 790/239488=0.003  |
| 98  | VPS33B   | NM_018668.4    | c.97-3C>T               | intronic | 2  |               |                    |                   |
| 99  | PNPLA1   | NM_001374623.1 | c.745G>A                | exonic   | 5  | nonsynonymous | p.Glu249Lys        | 813/277218=0.003  |
| 100 | SPINK5   | NM_001127698.2 | c.2954T>C               | exonic   | 30 | nonsynonymous | p.Val985Ala        | 982/276828=0.004  |
| 100 | ST14     | NM_021978.4    | c.800C>A                | exonic   | 7  | nonsynonymous | p.Ser267Tyr        | 2/240850=0        |
| 101 | GJB4     | NM_153212.3    | c.153delT               | exonic   | 2  | frameshift    | p.Phe51Leufs*57    | 1464/276392=0.005 |
| 101 | KRT9     | NM_000226.4    | c.1630G>A               | exonic   | 7  | nonsynonymous | p.Gly544Arg        | 10/179160=0       |
| 102 | ST14     | NM_021978.4    | c.1034G>A               | exonic   | 9  | nonsynonymous | p.Arg345His        | 302/277184=0.001  |
| 103 | GJB2     | NM_004004.6    | c.35delG                | exonic   | 2  | frameshift    | p.Gly12Valfs*2     | 1721/275002=0.006 |
| 103 | GJB4     | NM_153212.3    | c.384G>A                | exonic   | 2  | stopgain      | p.Trp128*          | 527/277132=0.002  |
| 103 | PNPLA1   | NM_001374623.1 | c.745G>A                | exonic   | 5  | nonsynonymous | p.Glu249Lys        | 813/277218=0.003  |
| 103 | ST14     | NM_021978.4    | c.1975A>G               | exonic   | 16 | nonsynonymous | p.Ile659Val        | 33/245026=0       |
| 104 | NIPAL4   | NM_001099287.1 | c.86C>A                 | exonic   | 1  | stopgain      | p.Ser29*           | 3/121822=0        |
| 105 | PNPLA1   | NM_001374623.1 | c.1464T>A               | exonic   | 7  | stopgain      | p.Tyr488*          | 3104/273832=0.011 |
| 106 | ABCA12   | NM_173076.3    | c.300T>G                | exonic   | 3  | nonsynonymous | p.Asp100Glu        | 6/276566=0        |
| 107 | PNPLA1   | NM_001374623.1 | c.714+7G>A              | intronic | 4  |               |                    | 2/244890=0        |
| 107 | SUMF1    | NM_182760.4    | c.935T>C                | exonic   | 7  | nonsynonymous | p.Val312Ala        |                   |
| 108 | ABCA12   | NM_173076.3    | c.485C>T                | exonic   | 5  | nonsynonymous | p.Ala162Val        | 384/276512=0.001  |
| 108 | SERPINB7 | NM_003784.4    | c.833A>G                | exonic   | 8  | nonsynonymous | p.Gln278Arg        | 42/275758=0       |
| 108 | SPINK5   | NM_001127698.2 | c.3167T>G               | exonic   | 32 | nonsynonymous | p.Met1056Arg       | 26/246178=0       |
| 109 | SERPINB8 | NM_001366198.1 | c.988G>A                | exonic   | 7  | nonsynonymous | p.Ala330Thr        | 61/276742=0       |
| 110 | KRT10    | NM_001379366.1 | c.71G>A                 | exonic   | 1  | nonsynonymous | p.Gly24Glu         | 34/179406=0       |
| 111 | PNPLA1   | NM_001374623.1 | c.116C>G                | exonic   | 1  | nonsynonymous | p.Ala39Gly         |                   |

|     |          |                |                               |          |    |               |                    |                   |
|-----|----------|----------------|-------------------------------|----------|----|---------------|--------------------|-------------------|
| 111 | ZMPSTE24 | NM_005857.3    | c.1106G>A                     | exonic   | 9  | nonsynonymous | p.Arg369Gln        | 199/277132=0.001  |
| 112 | PNPLA1   | NM_001374623.1 | c.1464T>A                     | exonic   | 7  | stopgain      | p.Tyr488*          | 3104/273832=0.011 |
| 113 | SERPINB8 | NM_001366198.1 | c.1121C>T                     | exonic   | 7  | nonsynonymous | p.Pro374Leu        | 9/273242=0        |
| 114 | ABCA12   | NM_173076.3    | c.1743C>G                     | exonic   | 14 | nonsynonymous | p.Asp581Glu        | 246/277138=0.001  |
| 115 | KRT10    | NM_001379366.1 | c.158G>A                      | exonic   | 1  | nonsynonymous | p.Ser53Asn         | 65/276636=0       |
| 116 | ALDH3A2  | NM_001031806.2 | c.17G>C                       | exonic   | 1  | nonsynonymous | p.Arg6Pro          | 3/223156=0        |
| 117 | GJB2     | NM_004004.6    | c.35delG                      | exonic   | 2  | frameshift    | p.Gly12Valfs*2     | 1721/275002=0.006 |
| 118 | ALDH3A2  | NM_001031806.2 | c.1270C>T                     | exonic   | 9  | nonsynonymous | p.Pro424Ser        | 1205/277210=0.004 |
| 118 | ZMPSTE24 | NM_005857.3    | c.1235G>A                     | exonic   | 10 | nonsynonymous | p.Arg412His        | 11/246164=0       |
| 119 | GJB3     | NM_024009.3    | c.196_198delGAC               | exonic   | 2  | inframe       | p.Asp66del         | 38/277154=0       |
| 120 | NIPAL4   | NM_001099287.1 | c.446C>T                      | exonic   | 2  | nonsynonymous | p.Thr149Met        | 294/266230=0.001  |
| 121 | NIPAL4   | NM_001099287.1 | c.581C>T                      | exonic   | 4  | nonsynonymous | p.Thr194Met        | 1/243716=0        |
| 121 | SERPINB7 | NM_003784.4    | c.220T>C                      | exonic   | 4  | nonsynonymous | p.Ser74Pro         | 9/247468=0        |
| 122 | KRT9     | NM_000226.4    | c.245G>A                      | exonic   | 1  | nonsynonymous | p.Ser82Asn         | 628/274158=0.002  |
| 123 | PNPLA1   | NM_001374623.1 | c.1464T>A                     | exonic   | 7  | stopgain      | p.Tyr488*          | 3104/273832=0.011 |
| 124 | ALOX12B  | NM_001139.3    | c.280G>A                      | exonic   | 2  | nonsynonymous | p.Gly94Ser         | 2588/264690       |
| 124 | KRT10    | NM_001379366.1 | c.1443_1457delAAGCTCCGGCGGCGG | exonic   | 7  | inframe       | p.Ser482_Gly486del | 1/99466=0         |
| 124 | SPINK5   | NM_001127698.2 | c.2954T>C                     | exonic   | 30 | nonsynonymous | p.Val985Ala        | 982/276828=0.004  |
| 124 | ST14     | NM_021978.4    | c.454A>G                      | exonic   | 5  | nonsynonymous | p.Ile152Val        | 876/276060=0.003  |
| 124 | TGM1     | NM_000359.3    | c.2405A>T                     | exonic   | 15 | nonsynonymous | p.Asp802Val        | 262/277042=0.001  |
| 125 | PNPLA1   | NM_001374623.1 | c.472T>A                      | exonic   | 3  | nonsynonymous | p.Cys158Ser        |                   |
| 125 | STS      | NM_001320751.2 | c.1147A>G                     | exonic   | 10 | nonsynonymous | p.Ile383Val        | 9/178456=0        |
| 126 | SPINK5   | NM_001127698.2 | c.1451G>A                     | exonic   | 16 | nonsynonymous | p.Arg484Lys        | 343/276350=0.001  |
| 127 | CDSN     | NM_001264.4    | c.782G>T                      | exonic   | 2  | nonsynonymous | p.Gly261Val        |                   |
| 127 | ELOVL4   | NM_022726.4    | c.800T>C                      | exonic   | 6  | nonsynonymous | p.Ile267Thr        | 2004/276984=0.007 |
| 127 | NIPAL4   | NM_001099287.1 | c.176C>A                      | exonic   | 1  | nonsynonymous | p.Ala59Asp         | 0/242706=0        |
| 127 | SERPINB7 | NM_003784.4    | c.992A>C                      | exonic   | 8  | nonsynonymous | p.Glu331Ala        | 113/276360=0      |
| 128 | SERPINB8 | NM_001366198.1 | c.254T>G                      | exonic   | 3  | nonsynonymous | p.Leu85Trp         | 568/277052=0.002  |
| 129 | GJB2     | NM_004004.6    | c.23C>T                       | exonic   | 2  | nonsynonymous | p.Thr8Met          | 21/275096=0       |
| 129 | SUMF1    | NM_182760.4    | c.664G>C                      | exonic   | 5  | nonsynonymous | p.Gly222Arg        | 450/277142=0.002  |
| 130 | GJB6     | NM_001370092.1 | c.212T>C                      | exonic   | 5  | nonsynonymous | p.Val71Ala         | 110/277050=0      |
| 131 | KRT1     | NM_006121.4    | c.1912A>G                     | exonic   | 9  | nonsynonymous | p.Thr638Ala        | 35/276622=0       |
| 132 | SULT2B1  | NM_004605.2    | c.600+3G>A                    | intronic | 4  |               |                    |                   |
| 133 | SERPINB7 | NM_003784.4    | c.220T>C                      | exonic   | 4  | nonsynonymous | p.Ser74Pro         | 9/247468=0        |
| 134 | SULT2B1  | NM_004605.2    | c.107T>C                      | exonic   | 1  | nonsynonymous | p.Leu36Ser         | 1287/274634=0.005 |
| 135 | ABHD5    | NM_001365649.1 | c.505C>G                      | exonic   | 4  | nonsynonymous | p.Pro169Ala        | 21/277218=0       |
| 136 | GJB4     | NM_153212.3    | c.386G>A                      | exonic   | 2  | stopgain      | p.Trp129*          | 59/277112=0       |
| 137 | ALOXE3   | NM_001165960.1 | c.1076C>T                     | exonic   | 6  | nonsynonymous | p.Ala359Val        | 51/246268=0       |
| 137 | GJB4     | NM_153212.3    | c.153delT                     | exonic   | 2  | frameshift    | p.Phe51Leufs*57    | 1464/276392=0.005 |
| 137 | KRT10    | NM_001379366.1 | c.710+6T>C                    | intronic | 2  |               |                    | 5/277170=0        |
| 137 | PEX7     | NM_000288.4    | c.961A>T                      | exonic   | 10 | nonsynonymous | p.Ile321Phe        |                   |
| 137 | SERPINB8 | NM_001366198.1 | c.254T>G                      | exonic   | 3  | nonsynonymous | p.Leu85Trp         | 568/277052=0.002  |
| 137 | SNAP29   | NM_004782.4    | c.113C>T                      | exonic   | 1  | nonsynonymous | p.Pro38Leu         | 139/246926=0.001  |
| 137 | SUMF1    | NM_182760.4    | c.59T>G                       | exonic   | 1  | nonsynonymous | p.Leu20Ar          | 988/267246=0.004  |
| 138 | ALOXE3   | NM_001165960.1 | c.989T>C                      | exonic   | 6  | nonsynonymous | p.Ile330Thr        | 4/246268=0        |
| 139 | KRT2     | NM_000423.3    | c.317G>A                      | exonic   | 1  | nonsynonymous | p.Ser106Asn        | 641/254108=0.003  |

|     |         |                |                                   |        |    |               |                    |                   |
|-----|---------|----------------|-----------------------------------|--------|----|---------------|--------------------|-------------------|
| 139 | TGM1    | NM_000359.3    | c.90_95dupGCCAGA                  | exonic | 2  | inframe       | p.Glu30_Pro31dup   | 132/276714=0      |
| 140 | GJB2    | NM_004004.6    | c.457G>A                          | exonic | 2  | nonsynonymous | p.Val153Ile        | 2433/276862=0.009 |
| 140 | STS     | NM_001320751.2 | c.478C>T                          | exonic | 7  | nonsynonymous | p.His160Tyr        |                   |
| 140 | SULT2B1 | NM_004605.2    | c.232C>T                          | exonic | 2  | nonsynonymous | p.Arg78Cys         | 252/276636=0.001  |
| 141 | ABCA12  | NM_173076.3    | c.1446A>C                         | exonic | 12 | nonsynonymous | p.Glu482Asp        | 29/276918=0       |
| 141 | GJA1    | NM_000165.5    | c.758C>T                          | exonic | 2  | nonsynonymous | p.Ala253Val        | 2227/277148=0.008 |
| 141 | NIPAL4  | NM_001099287.1 | c.839G>A                          | exonic | 6  | nonsynonymous | p.Arg280His        | 60/276956=0       |
| 142 | PNPLA1  | NM_001374623.1 | c.1464T>A                         | exonic | 7  | stopgain      | p.Tyr488*          | 3104/273832=0.011 |
| 143 | ALDH3A2 | NM_001031806.2 | c.1270C>T                         | exonic | 9  | nonsynonymous | p.Pro424Ser        | 1205/277210=0.004 |
| 144 | CLDN1   | NM_0211101.5   | c.278T>C                          | exonic | 2  | nonsynonymous | p.Ile93Thr         |                   |
| 144 | KRT10   | NM_001379366.1 | c.1650_1667delCAGCAGCTCCGGCGGCGGG | exonic | 7  | inframe       | p.Ser551_Gly556del | 34/219570=0       |
| 145 | GJB2    | NM_004004.6    | c.358_360delIGAG                  | exonic | 2  | inframe       | p.Glu120del        | 20/275990=0       |
| 145 | PNPLA1  | NM_001374623.1 | c.1464T>A                         | exonic | 7  | stopgain      | p.Tyr488*          | 3104/273832=0.011 |
| 146 | ABCA12  | NM_173076.3    | c.485C>T                          | exonic | 5  | nonsynonymous | p.Ala162Val        | 384/276512=0.001  |
| 146 | ST14    | NM_021978.4    | c.508G>A                          | exonic | 5  | nonsynonymous | p.Glu170Lys        | 521/276770=0.002  |
| 147 | SLC27A4 | NM_005094.4    | c.1300G>A                         | exonic | 9  | nonsynonymous | p.Gly434Ser        | 9/245968=0        |
| 147 | VPS33B  | NM_018668.4    | c.1166G>A                         | exonic | 15 | nonsynonymous | p.Arg389Gln        | 590/277118=0.002  |
| 148 | ALDH3A2 | NM_001031806.2 | c.28C>G                           | exonic | 1  | nonsynonymous | p.Gln10Glu         | 806/218946=0.004  |
| 148 | CYP4F22 | NM_173483.4    | c.665G>T                          | exonic | 7  | nonsynonymous | p.Cys222Phe        |                   |
| 149 | CAST    | NM_001750.7    | c.620C>T                          | exonic | 9  | nonsynonymous | p.Pro207Leu        | 5/246206=0        |
| 150 | CAST    | NM_001750.7    | c.1177C>T                         | exonic | 16 | nonsynonymous | p.Arg393Cys        | 34/276754=0       |
| 150 | GJB3    | NM_024009.3    | c.293G>A                          | exonic | 2  | nonsynonymous | p.Arg98His         | 23/276870=0       |
| 151 | GJB2    | NM_004004.6    | c.35delG                          | exonic | 2  | frameshift    | p.Gly12Valfs*2     | 1721/275002=0.006 |
| 151 | GJB4    | NM_153212.3    | c.384G>A                          | exonic | 2  | stopgain      | p.Trp128*          | 527/277132=0.002  |
| 151 | LIPN    | NM_001102469.1 | c.302delG                         | exonic | 3  | frameshift    | p.Gly101Glufs*7    | 50/276298=0       |
| 152 | KRT2    | NM_000423.3    | c.1750A>G                         | exonic | 9  | nonsynonymous | p.Ile584Val        |                   |
| 152 | TGM1    | NM_000359.3    | c.208G>T                          | exonic | 2  | nonsynonymous | p.Gly70Cys         |                   |
| 153 | GJB2    | NM_004004.6    | c.467T>A                          | exonic | 2  | nonsynonymous | p.Val156Asp        |                   |
| 154 | GJB2    | NM_004004.6    | c.296G>A                          | exonic | 2  | nonsynonymous | p.Arg99Lys         |                   |
| 155 | PNPLA1  | NM_001374623.1 | c.1464T>A                         | exonic | 7  | stopgain      | p.Tyr488*          | 3104/273832=0.011 |
| 156 | GJA1    | NM_000165.5    | c.758C>T                          | exonic | 2  | nonsynonymous | p.Ala253Val        | 2227/277148=0.008 |
| 156 | GJA1    | NM_000165.5    | c.157C>T                          | exonic | 2  | nonsynonymous | p.Arg53Cys         | 2/246262=0        |
| 156 | PHYH    | NM_001323080.2 | c.301C>G                          | exonic | 6  | nonsynonymous | p.Arg101Gly        | 351/277160=0.001  |
| 157 | KRT1    | NM_006121.4    | c.1390G>A                         | exonic | 7  | nonsynonymous | p.Asp464Asn        | 1/246258=0        |
| 157 | ST14    | NM_021978.4    | c.2146G>C                         | exonic | 17 | nonsynonymous | p.Glu716Gln        |                   |
| 158 | ABCA12  | NM_173076.3    | c.6919A>G                         | exonic | 46 | nonsynonymous | p.Ile2307Val       | 486/277078=0.002  |
| 158 | ALOX12B | NM_001139.3    | c.1431delC                        | exonic | 11 | frameshift    | p.Asp477Glufs*37   | 1/245856=0        |
| 159 | GJB2    | NM_004004.6    | c.101T>C                          | exonic | 2  | nonsynonymous | p.Met34Thr         | 2487/276420=0.009 |
| 159 | ST14    | NM_021978.4    | c.967C>T                          | exonic | 8  | nonsynonymous | p.Arg323Trp        | 2/246262=0        |
| 159 | ST14    | NM_021978.4    | c.1975A>G                         | exonic | 16 | nonsynonymous | p.Ile659Val        | 33/245026=0       |
| 160 | ABCA12  | NM_173076.3    | c.6919A>G                         | exonic | 46 | nonsynonymous | p.Ile2307Val       | 486/277078=0.002  |
| 160 | GJB4    | NM_153212.3    | c.153delT                         | exonic | 2  | frameshift    | p.Phe51Leufs*57    | 1464/276392=0.005 |
| 160 | KRT2    | NM_000423.3    | c.767A>G                          | exonic | 2  | nonsynonymous | p.Asn256Ser        | 110/277226=0      |
| 160 | PNPLA1  | NM_001374623.1 | c.985T>C                          | exonic | 6  | nonsynonymous | p.Ser329Pro        | 615/276868=0.002  |
| 161 | ABCA12  | NM_173076.3    | c.6919A>G                         | exonic | 46 | nonsynonymous | p.Ile2307Val       | 486/277078=0.002  |
| 161 | PNPLA1  | NM_001374623.1 | c.1464T>A                         | exonic | 7  | stopgain      | p.Tyr488*          | 3104/273832=0.011 |

|              |                |                    |        |    |               |                |                   |
|--------------|----------------|--------------------|--------|----|---------------|----------------|-------------------|
| 162 STS      | NM_001320751.2 | c.1168C>T          | exonic | 10 | nonsynonymous | p.Arg390Cys    | 4/178511=0        |
| 163 ALOXE3   | NM_001165960.1 | c.1483C>T          | exonic | 9  | nonsynonymous | p.Pro495Ser    |                   |
| 163 PNPLA1   | NM_001374623.1 | c.1464T>A          | exonic | 7  | stopgain      | p.Tyr488*      | 3104/273832=0.011 |
| 164 SPINK5   | NM_001127698.2 | c.1362G>C          | exonic | 15 | nonsynonymous | p.Glu454Asp    | 1/245736=0        |
| 165 SPINK5   | NM_001127698.2 | c.1362G>C          | exonic | 15 | nonsynonymous | p.Glu454Asp    | 1/245736=0        |
| 166 GJB2     | NM_004004.6    | c.358_360delGAG    | exonic | 2  | inframe       | p.Glu120del    | 20/275990=0       |
| 166 GJB3     | NM_024009.3    | c.293G>A           | exonic | 2  | nonsynonymous | p.Arg98His     | 23/276870=0       |
| 167 GJB6     | NM_001370092.1 | c.607A>G           | exonic | 5  | nonsynonymous | p.Met203Val    | 247/277132=0.001  |
| 167 PHYH     | NM_001323080.2 | c.56C>T            | exonic | 4  | nonsynonymous | p.Thr19Met     | 367/277256=0.001  |
| 167 PHYH     | NM_001323080.2 | c.403G>A           | exonic | 7  | nonsynonymous | p.Gly135Arg    | 2/246256=0        |
| 167 SULT2B1  | NM_004605.2    | c.232C>T           | exonic | 2  | nonsynonymous | p.Arg78Cys     | 252/276636=0.001  |
| 168 ABCA12   | NM_173076.3    | c.6919A>G          | exonic | 46 | nonsynonymous | p.Ile2307Val   | 486/277078=0.002  |
| 168 GJB3     | NM_024009.3    | c.670C>T           | exonic | 2  | stopgain      | p.Arg224*      | 11/276538=0       |
| 168 KRT9     | NM_000226.4    | c.49G>A            | exonic | 1  | nonsynonymous | p.Gly17Ser     |                   |
| 169 ST14     | NM_021978.4    | c.2553G>C          | exonic | 19 | nonsynonymous | p.Glu851Asp    | 6/276830=0        |
| 170 VPS33B   | NM_018668.4    | c.1307A>G          | exonic | 18 | nonsynonymous | p.Asn436Ser    | 15/277084=0       |
| 171 GJA1     | NM_000165.5    | c.758C>T           | exonic | 2  | nonsynonymous | p.Ala253Val    | 2227/277148=0.008 |
| 171 LIPN     | NM_001102469.1 | c.772G>A           | exonic | 6  | nonsynonymous | p.Glu258Lys    | 316/215004=0.001  |
| 171 SPINK5   | NM_001127698.2 | c.2852A>G          | exonic | 30 | nonsynonymous | p.Asn951Ser    | 1264/277148=0.005 |
| 172 ABCA12   | NM_173076.3    | c.6704A>C          | exonic | 45 | nonsynonymous | p.Glu2235Ala   | 184/277156=0.001  |
| 172 ALOX12B  | NM_001139.3    | c.715A>G           | exonic | 6  | nonsynonymous | p.Ile239Val    | 24/277224=0       |
| 172 ELOVL4   | NM_022726.4    | c.800T>C           | exonic | 6  | nonsynonymous | p.Ile267Thr    | 2004/276984=0.007 |
| 172 SLC27A4  | NM_005094.4    | c.952C>T           | exonic | 7  | nonsynonymous | p.Arg318Trp    | 28/277118=0       |
| 173 LIPN     | NM_001102469.1 | c.772G>A           | exonic | 6  | nonsynonymous | p.Glu258Lys    | 316/215004=0.001  |
| 174 VPS33B   | NM_018668.4    | c.1274G>A          | exonic | 18 | nonsynonymous | p.Ser425Asn    | 350/277058=0.001  |
| 175 ALOXE3   | NM_001165960.1 | c.1454T>A          | exonic | 9  | nonsynonymous | p.Leu485Gln    |                   |
| 176 SERPINB7 | NM_003784.4    | c.220T>C           | exonic | 4  | nonsynonymous | p.Ser74Pro     | 9/247468=0        |
| 177 STS      | NM_001320751.2 | c.1274A>G          | exonic | 10 | nonsynonymous | p.Asp425Gly    | 184/199731=0.001  |
| 178 KRT1     | NM_006121.4    | c.1693A>G          | exonic | 9  | nonsynonymous | p.Ser565Gly    |                   |
| 179 NIPAL4   | NM_001099287.1 | c.730G>T           | exonic | 5  | nonsynonymous | p.Val244Phe    | 170/254010=0.001  |
| 179 SLC27A4  | NM_005094.4    | c.1788C>G          | exonic | 13 | nonsynonymous | p.Phe596Leu    | 3/246250=0        |
| 179 TGM1     | NM_000359.3    | c.550C>T           | exonic | 4  | nonsynonymous | p.Pro184Ser    | 183/277094=0.001  |
| 180 ALOX12B  | NM_001139.3    | c.526G>A           | exonic | 4  | nonsynonymous | p.Glu176Lys    | 92/276916=0       |
| 180 ALOXE3   | NM_001165960.1 | c.1843C>T          | exonic | 12 | nonsynonymous | p.His615Tyr    |                   |
| 180 GJB4     | NM_153212.3    | c.314A>G           | exonic | 2  | nonsynonymous | p.His105Arg    | 10/277130=0       |
| 181 ALOX12B  | NM_001139.3    | c.526G>A           | exonic | 4  | nonsynonymous | p.Glu176Lys    | 92/276916=0       |
| 181 CLDN1    | NM_021101.5    | c.136A>T           | exonic | 1  | nonsynonymous | p.Met46Leu     | 15/246242=0       |
| 182 CLDN1    | NM_021101.5    | c.136A>T           | exonic | 1  | nonsynonymous | p.Met46Leu     | 15/246242=0       |
| 183 LIPN     | NM_001102469.1 | c.633T>G           | exonic | 5  | nonsynonymous | p.Ile211Met    | 12/275930=0       |
| 184 ABCA12   | NM_173076.3    | c.539T>C           | exonic | 6  | nonsynonymous | p.Ile180Thr    | 3/245112=0        |
| 184 GJB2     | NM_004004.6    | c.101T>C           | exonic | 2  | nonsynonymous | p.Met34Thr     | 2487/276420=0.009 |
| 184 SUMF1    | NM_182760.4    | c.131G>A           | exonic | 1  | nonsynonymous | p.Gly44Glu     |                   |
| 185 GJB2     | NM_004004.6    | c.35delG           | exonic | 2  | frameshift    | p.Gly12Valfs*2 | 1721/275002=0.006 |
| 186 ST14     | NM_021978.4    | c.145A>T           | exonic | 2  | stopgain      | p.Lys49*       |                   |
| 187 TGM1     | NM_000359.3    | c.550C>T           | exonic | 4  | nonsynonymous | p.Pro184Ser    | 183/277094=0.001  |
| 188 ABCA12   | NM_173076.3    | <u>c.485C&gt;T</u> | exonic | 5  | nonsynonymous | p.Ala162Val    | 384/276512=0.001  |

|     |          |                |             |          |    |               |                |                   |
|-----|----------|----------------|-------------|----------|----|---------------|----------------|-------------------|
| 189 | TGM1     | NM_000359.3    | c.208G>T    | exonic   | 2  | nonsynonymous | p.Gly70Cys     |                   |
| 190 | ALOXE3   | NM_001165960.1 | c.2102C>A   | exonic   | 14 | nonsynonymous | p.Thr701Asn    | 102/276992=0      |
| 190 | ALOXE3   | NM_001165960.1 | c.2404C>T   | exonic   | 16 | nonsynonymous | p.Arg802Trp    | 239/277182=0.001  |
| 190 | CYP4F22  | NM_173483.4    | c.463C>T    | exonic   | 6  | nonsynonymous | p.His155Tyr    | 121/277112=0      |
| 190 | NIPAL4   | NM_001099287.1 | c.397G>A    | exonic   | 2  | nonsynonymous | p.Gly133Ser    | 9/277110=0        |
| 191 | ABCA12   | NM_173076.3    | c.501G>C    | exonic   | 5  | nonsynonymous | p.Leu167Phe    |                   |
| 192 | KRT2     | NM_000423.3    | c.767A>G    | exonic   | 2  | nonsynonymous | p.Asn256Ser    | 110/277226=0      |
| 192 | NIPAL4   | NM_001099287.1 | c.730G>T    | exonic   | 5  | nonsynonymous | p.Val244Phe    | 170/254010=0.001  |
| 192 | SERPINB7 | NM_003784.4    | c.715G>A    | exonic   | 7  | nonsynonymous | p.Val239Ile    | 20/276514=0       |
| 192 | SPINK5   | NM_001127698.2 | c.1451G>A   | exonic   | 16 | nonsynonymous | p.Arg484Lys    | 343/276350=0.001  |
| 193 | ALOXE3   | NM_001165960.1 | c.2510T>C   | exonic   | 16 | nonsynonymous | p.Ile837Thr    | 333/277202=0.001  |
| 193 | CERS3    | NM_001290341.2 | c.914A>G    | exonic   | 13 | nonsynonymous | p.His305Arg    | 3292/264968=0.012 |
| 193 | NIPAL4   | NM_001099287.1 | c.397G>A    | exonic   | 2  | nonsynonymous | p.Gly133Ser    | 9/277110=0        |
| 193 | ST14     | NM_021978.4    | c.508G>A    | exonic   | 5  | nonsynonymous | p.Glu170Lys    | 521/276770=0.002  |
| 194 | ALOXE3   | NM_001165960.1 | c.2510T>C   | exonic   | 16 | nonsynonymous | p.Ile837Thr    | 333/277202=0.001  |
| 194 | CAST     | NM_001750.7    | c.1283C>T   | exonic   | 17 | nonsynonymous | p.Thr428Met    | 909/277064=0.003  |
| 194 | CYP4F22  | NM_173483.4    | c.463C>T    | exonic   | 6  | nonsynonymous | p.His155Tyr    | 121/277112=0      |
| 194 | ST14     | NM_021978.4    | c.2406+4G>C | intronic | 18 |               |                | 193/212654=0.001  |
| 195 | ABCA12   | NM_173076.3    | c.485C>T    | exonic   | 5  | nonsynonymous | p.Ala162Val    | 384/276512=0.001  |
| 195 | SULT2B1  | NM_004605.2    | c.107T>C    | exonic   | 1  | nonsynonymous | p.Leu36Ser     | 1287/274634=0.005 |
| 196 | GJB3     | NM_024009.3    | c.659A>T    | exonic   | 2  | nonsynonymous | p.Lys220Met    | 1/246042=0        |
| 197 | NIPAL4   | NM_001099287.1 | c.176C>A    | exonic   | 1  | nonsynonymous | p.Ala59Asp     |                   |
| 198 | GJB2     | NM_004004.6    | c.35delG    | exonic   | 2  | frameshift    | p.Gly12Valfs*2 | 1721/275002=0.006 |
| 198 | SLC27A4  | NM_005094.4    | c.742G>A    | exonic   | 5  | nonsynonymous | p.Gly248Ser    |                   |
| 199 | ALOXE3   | NM_001165960.1 | c.2510T>C   | exonic   | 16 | nonsynonymous | p.Ile837Thr    | 333/277202=0.001  |
| 199 | CYP4F22  | NM_173483.4    | c.851G>A    | exonic   | 8  | nonsynonymous | p.Arg284Gln    | 9/276864=0        |
| 200 | ABCA12   | NM_173076.3    | c.1141G>C   | exonic   | 10 | nonsynonymous | p.Val381Leu    | 239/277242=0.001  |
| 201 | ALOXE3   | NM_001165960.1 | c.2510T>C   | exonic   | 16 | nonsynonymous | p.Ile837Thr    | 333/277202=0.001  |
| 201 | GJB4     | NM_153212.3    | c.389C>T    | exonic   | 2  | nonsynonymous | p.Thr130Met    | 30/277058=0       |
| 202 | GJB2     | NM_004004.6    | c.35delG    | exonic   | 2  | frameshift    | p.Gly12Valfs*2 | 1721/275002=0.006 |
| 202 | SULT2B1  | NM_004605.2    | c.867G>A    | exonic   | 6  | nonsynonymous | p.Met289Ile    | 270/262312=0.001  |
| 203 | VPS33B   | NM_018668.4    | c.1837A>T   | exonic   | 23 | nonsynonymous | p.Ser613Cys    |                   |
| 204 | ALDH3A2  | NM_001031806.1 | c.1270C>T   | exonic   | 8  | nonsynonymous | p.Pro424Ser    | 1205/277210=0.004 |
| 204 | ELOVL4   | NM_022726.4    | c.814G>C    | exonic   | 6  | nonsynonymous | p.Glu272Gln    | 2735/277052=0.01  |
| 204 | GJB2     | NM_004004.6    | c.35delG    | exonic   | 2  | frameshift    | p.Gly12Valfs*2 | 1721/275002=0.006 |
| 204 | NIPAL4   | NM_001099287.1 | c.296T>C    | exonic   | 2  | nonsynonymous | p.Val99Ala     | 783/277214=0.003  |
| 204 | SULT2B1  | NM_004605.2    | c.867G>A    | exonic   | 6  | nonsynonymous | p.Met289Ile    | 270/262312=0.001  |
| 205 | GJB2     | NM_004004.6    | c.35delG    | exonic   | 2  | frameshift    | p.Gly12Valfs*2 | 1721/275002=0.006 |
