# Supplementary material for: Comprehensive Molecular Analysis of Disease-Related Genes as First-Tier Test for Early Diagnosis, Classification, and Management of Patients Affected by Nonsyndromic Ichthyosis
Source: MDPI journal article supplement (doi:10.3390/biomedicines12051112), 2024-05-17
Supplement: s1 [file s1]

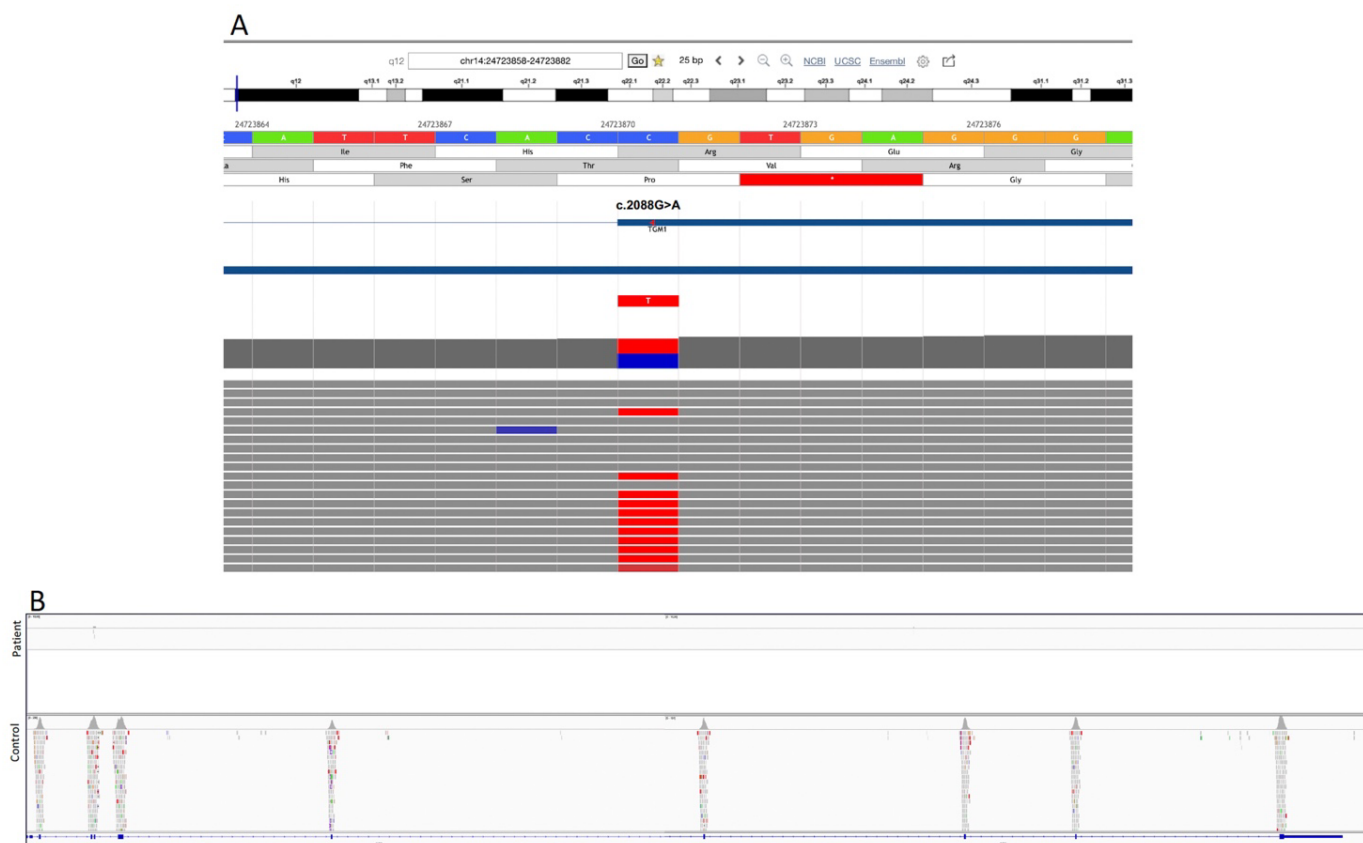

Figure S1

**Integrative Genomics Viewer visualization of NGS data.** (A) Position of the synonymous variant c.2088G>A p.(Thr696=) in the TGM1 exon 13 sequence; (B) Coverage of the 9 exons of STS gene (NM\_000351.7) in a patient hemizygous for a whole gene deletion, compared with a normal male. In the patient, there are no visible reads for any exons of the STS gene.
