# Supplementary material for: Comprehensive Molecular Analysis of Disease-Related Genes as First-Tier Test for Early Diagnosis, Classification, and Management of Patients Affected by Nonsyndromic Ichthyosis
Source: MDPI journal article supplement (doi:10.3390/biomedicines12051112), 2024-05-17
Supplement: s1 [file s1]

Supplementary Table S1 - ACGM pathogenic criteria for small variant (SV) classification and their relative Combined Annotation Dependent Depletion (CADD) scores

|         |              |                   | ACGM CLASSIFICATION |         | ACGM PATHOGENICITY CRITERIA |     |     |     |     |     |     |     |      |     | CADD Score   |
|---------|--------------|-------------------|---------------------|---------|-----------------------------|-----|-----|-----|-----|-----|-----|-----|------|-----|--------------|
| ALOX12B | c.47C>T      | p.(Ser16Leu)      | pathogenic          | Class 5 | PP1                         | PP2 |     | PP5 |     | PM2 | PM3 | PM5 |      |     | 23.8         |
|         | c.1798C>T    | p.(Arg600Trp)     | likely pathogenic   | Class 4 |                             | PP2 |     |     | PM1 | PM2 | PM3 | PM5 |      |     | 20.0         |
|         | c.1907G>T    | p.(Ser636Ile)§    | likely pathogenic   | Class 4 |                             | PP2 | PP3 |     |     | PM2 | PM3 |     |      |     | 26.8         |
|         | c.1192C>T    | p.(His398Tyr)     | pathogenic          | Class 5 |                             | PP2 | PP3 | PP5 | PM1 | PM2 | PM3 |     |      |     | 25.5         |
|         | c.1259G>A    | p.(Cys420Tyr)§    | likely pathogenic   | Class 4 |                             | PP2 |     |     | PM1 | PM2 | PM3 | PM5 |      |     | 27.1         |
|         | c.1642C>T    | p.(Arg548Trp)     | pathogenic          | Class 5 |                             | PP2 |     | PP5 | PM1 | PM2 | PM3 |     |      |     | 26.6         |
|         | c.1909C>G    | p.(Arg637Gly)§    | VUS                 | Class 3 |                             | PP2 |     |     |     | PM2 | PM3 |     |      |     | <b>15.28</b> |
|         | EX3_15del    | ?                 | pathogenic          | Class 5 |                             |     |     | PP5 |     | PM2 | PM3 |     | PVS1 |     | 30.0         |
|         |              |                   |                     |         |                             |     |     |     |     |     |     |     |      |     |              |
| NIPAL4  | c.398C>A     | p.(Pro133His)     | likely pathogenic   | Class 4 |                             |     | PP3 |     |     | PM2 | PM3 |     |      |     | 32.0         |
|         | c.514_515dup | p.(Met172Ilefs*)§ | pathogenic          | Class 5 |                             |     |     |     |     | PM2 | PM3 |     | PVS1 |     |              |
|         | c.137G>A     | p.(Trp46*)§       | pathogenic          | Class 5 |                             |     |     |     |     | PM2 | PM3 |     | PVS1 |     |              |
|         |              |                   |                     |         |                             |     |     |     |     |     |     |     |      |     |              |
| TGM1    | c.1166G>A    | p.(Arg389His)     | pathogenic          | Class 5 |                             |     | PP3 | PP5 | PM1 | PM2 | PM3 | PM5 |      |     | 33.0         |
|         | c.2088G>A    | p.(Thr696=)§      | likely pathogenic   | Class 4 |                             |     |     |     |     | PM2 | PM3 |     |      | PS3 | <b>17.8</b>  |

The CADD-SV scores range from 0 (potentially benign) to 48 (potentially pathogenic), indicating the position of the novel variant within the gnomAD-SV score distribution.

CADD score indicates the position of the novel variant within the gnomAD-SV score distribution.

A CADD score above 20 corresponds to the top top 1%, and 30 to the top 0.1% of scores observed from gnomAD-SV.

§ Novel causative variants identified in this study

Table S1. Overall number of rare variants identified in the ichthyosis-related genes of 300 unaffected individuals

| Subject ID | GENE    | GenBank #      | Nucleotide variant | gene position | Exon | Presumed effect | Presumed protein variant | gnomAD frequency  | ACMG prediction | OMIM identification                                                                                                                             |
|------------|---------|----------------|--------------------|---------------|------|-----------------|--------------------------|-------------------|-----------------|-------------------------------------------------------------------------------------------------------------------------------------------------|
| 106        | ABCA12  | NM_173076.3    | c.300T>G           | exonic        | 3    | nonsynonymous   | p.Asp100Glu              | 6/276566=0        | VOUS            | # 242500<br>ICHTHYOSIS, CONGENITAL, AUTOSOMAL<br>RECESSIVE 4B; ARCI4B                                                                           |
| 74         | ABCA12  | NM_173076.3    | c.346G>T           | exonic        | 4    | nonsynonymous   | p.Asp116Tyr              | 7/245398=0        | VOUS            |                                                                                                                                                 |
| 108        | ABCA12  | NM_173076.3    | c.485C>T           | exonic        | 5    | nonsynonymous   | p.Ala162Val              | 384/276512=0.001  | VOUS            |                                                                                                                                                 |
| 146        | ABCA12  | NM_173076.3    | c.485C>T           | exonic        | 5    | nonsynonymous   | p.Ala162Val              | 384/276512=0.001  | VOUS            |                                                                                                                                                 |
| 188        | ABCA12  | NM_173076.3    | c.485C>T           | exonic        | 5    | nonsynonymous   | p.Ala162Val              | 384/276512=0.001  | VOUS            |                                                                                                                                                 |
| 191        | ABCA12  | NM_173076.3    | c.501G>C           | exonic        | 5    | nonsynonymous   | p.Leu167Phe              |                   | VOUS            |                                                                                                                                                 |
| 195        | ABCA12  | NM_173076.3    | c.485C>T           | exonic        | 5    | nonsynonymous   | p.Ala162Val              | 384/276512=0.001  | VOUS            |                                                                                                                                                 |
| 184        | ABCA12  | NM_173076.3    | c.539T>C           | exonic        | 6    | nonsynonymous   | p.Ile180Thr              | 3/245112=0        | VOUS            |                                                                                                                                                 |
| 200        | ABCA12  | NM_173076.3    | c.1141G>C          | exonic        | 10   | nonsynonymous   | p.Val381Leup.V381L       | 239/277242=0.001  | LB              |                                                                                                                                                 |
| 89         | ABCA12  | NM_173076.3    | c.1222T>C          | exonic        | 11   | nonsynonymous   | p.Ser408Pro              | 322/276876=0.001  | B               |                                                                                                                                                 |
| 77         | ABCA12  | NM_173076.3    | c.1222T>C          | exonic        | 11   | nonsynonymous   | p.Ser408Pro              | 322/276876=0.001  | B               |                                                                                                                                                 |
| 89         | ABCA12  | NM_173076.3    | c.1475A>G          | exonic        | 12   | nonsynonymous   | p.Asn492Ser              | 5/276916=0        | VOUS            |                                                                                                                                                 |
| 141        | ABCA12  | NM_173076.3    | c.1446A>C          | exonic        | 12   | nonsynonymous   | p.Glu482Asp              | 29/276918=0       | VOUS            |                                                                                                                                                 |
| 114        | ABCA12  | NM_173076.3    | c.1743C>G          | exonic        | 14   | nonsynonymous   | p.Asp581Glu              | 246/277138=0.001  | LB              |                                                                                                                                                 |
| 15         | ABCA12  | NM_173076.3    | c.1816G>A          | exonic        | 15   | nonsynonymous   | p.Asp606Asn              | 2/245978=0        | VOUS            |                                                                                                                                                 |
| 7          | ABCA12  | NM_173076.3    | c.2129A>G          | exonic        | 17   | nonsynonymous   | p.Tyr710Cys              | 1/246028=0        | VOUS            |                                                                                                                                                 |
| 14         | ABCA12  | NM_173076.3    | c.2243G>A          | exonic        | 17   | nonsynonymous   | p.Arg748Lys              | 6/245968=0        | VOUS            |                                                                                                                                                 |
| 5          | ABCA12  | NM_173076.3    | c.3098T>C          | exonic        | 22   | nonsynonymous   | p.Ile1033Thr             | 2/245894=0        | VOUS            |                                                                                                                                                 |
| 55         | ABCA12  | NM_173076.3    | c.3481A>T          | exonic        | 24   | nonsynonymous   | p.Met1161Leu             | 363/277160=0.001  | LB              |                                                                                                                                                 |
| 62         | ABCA12  | NM_173076.3    | c.3481A>T          | exonic        | 24   | nonsynonymous   | p.Met1161Leu             | 363/277160=0.001  | LB              |                                                                                                                                                 |
| 54         | ABCA12  | NM_173076.3    | c.3481A>T          | exonic        | 24   | nonsynonymous   | p.Met1161Leu             | 363/277160=0.001  | LB              |                                                                                                                                                 |
| 49         | ABCA12  | NM_173076.3    | c.4618G>T          | exonic        | 31   | nonsynonymous   | p.Ala1540Ser             | 9/245910=0        | VOUS            |                                                                                                                                                 |
| 41         | ABCA12  | NM_173076.3    | c.5051T>C          | exonic        | 33   | nonsynonymous   | p.Ile1684Thr             | 4/245586=0        | VOUS            |                                                                                                                                                 |
| 36         | ABCA12  | NM_173076.3    | c.5617G>A          | exonic        | 37   | nonsynonymous   | p.Val1873Ile             | 670/276578=0.002  | LB              |                                                                                                                                                 |
| 29         | ABCA12  | NM_173076.3    | c.6208G>A          | exonic        | 42   | nonsynonymous   | p.Val2070Ile             | 514/276952=0.002  | B               |                                                                                                                                                 |
| 172        | ABCA12  | NM_173076.3    | c.6704A>C          | exonic        | 45   | nonsynonymous   | p.Glu2235Ala             | 184/277156=0.001  | B               |                                                                                                                                                 |
| 158        | ABCA12  | NM_173076.3    | c.6919A>G          | exonic        | 46   | nonsynonymous   | p.Ile2307Val             | 486/277078=0.002  | LB              |                                                                                                                                                 |
| 168        | ABCA12  | NM_173076.3    | c.6919A>G          | exonic        | 46   | nonsynonymous   | p.Ile2307Val             | 486/277078=0.002  | LB              |                                                                                                                                                 |
| 160        | ABCA12  | NM_173076.3    | c.6919A>G          | exonic        | 46   | nonsynonymous   | p.Ile2307Val             | 486/277078=0.002  | LB              |                                                                                                                                                 |
| 161        | ABCA12  | NM_173076.3    | c.6919A>G          | exonic        | 46   | nonsynonymous   | p.Ile2307Val             | 486/277078=0.002  | LB              |                                                                                                                                                 |
| 65         | ABCA12  | NM_173076.3    | c.7631C>T          | exonic        | 52   | nonsynonymous   | p.Thr2544Ile             | 379/276596=0.001  | B               |                                                                                                                                                 |
| 74         | ABHD5   | NM_001365649.1 | c.22A>G            | exonic        | 3    | nonsynonymous   | p.Thr8Ala                | 12/237020=0       | B               | # 275630<br>CHANARIN-DORFMAN SYNDROME; CDS AR                                                                                                   |
| 66         | ABHD5   | NM_001365649.1 | c.22A>G            | exonic        | 3    | nonsynonymous   | p.Thr8Ala                | 12/237020=0       | B               |                                                                                                                                                 |
| 135        | ABHD5   | NM_001365649.1 | c.505C>G           | exonic        | 4    | nonsynonymous   | p.Pro169Ala              | 21/277218=0       | VOUS            |                                                                                                                                                 |
| 96         | ABHD5   | NM_001365649.1 | c.883G>T           | exonic        | 7    | stopgain        | p.Glu295*                | 1/121404=0        | P               |                                                                                                                                                 |
| 47         | ALDH3A2 | NM_001031806.2 | c.17G>C            | exonic        | 1    | nonsynonymous   | p.Arg6Pro                | 3/223156=0        | VOUS            | # 270200<br>SJOGREN-LARSSON SYNDROME; SLS<br><br>Alternative titles; symbols<br>ICHTHYOSIS, SPASTIC NEUROLOGIC DISORDER, AND<br>OLIGOPHRENIA AR |
| 89         | ALDH3A2 | NM_001031806.2 | c.119A>G           | exonic        | 1    | nonsynonymous   | p.Asp40Gly               | 155/218008=0.001  | LB              |                                                                                                                                                 |
| 116        | ALDH3A2 | NM_001031806.2 | c.17G>C            | exonic        | 1    | nonsynonymous   | p.Arg6Pro                | 3/223156=0        | VOUS            |                                                                                                                                                 |
| 148        | ALDH3A2 | NM_001031806.2 | c.28C>G            | exonic        | 1    | nonsynonymous   | p.Gln10Glu               | 806/218946=0.004  | B               |                                                                                                                                                 |
| 55         | ALDH3A2 | NM_001031806.2 | c.17G>C            | exonic        | 2    | nonsynonymous   | p.Arg6Pro                | 3/223156=0        | VOUS            |                                                                                                                                                 |
| 76         | ALDH3A2 | NM_001031806.2 | c.661G>A           | exonic        | 4    | nonsynonymous   | p.Asp221Asn              | 1/244348=0        | VOUS            |                                                                                                                                                 |
| 204        | ALDH3A2 | NM_001031806.1 | c.1270C>T          | exonic        | 8    | nonsynonymous   | p.Pro424Ser              | 1205/277210=0.004 | VOUS            |                                                                                                                                                 |
| 40         | ALDH3A2 | NM_001031806.2 | c.1270C>T          | exonic        | 9    | nonsynonymous   | p.Pro424Ser              | 1205/277210=0.004 | VOUS            |                                                                                                                                                 |
| 118        | ALDH3A2 | NM_001031806.2 | c.1270C>T          | exonic        | 9    | nonsynonymous   | p.Pro424Ser              | 1205/277210=0.004 | VOUS            |                                                                                                                                                 |
| 143        | ALDH3A2 | NM_001031806.2 | c.1270C>T          | exonic        | 9    | nonsynonymous   | p.Pro424Ser              | 1205/277210=0.004 | VOUS            |                                                                                                                                                 |
| 124        | ALOX12B | NM_001139.3    | c.280G>A           | exonic        | 2    | nonsynonymous   | p.Gly94Ser               | 2588/264690       | LB              | # 242100<br>ICHTHYOSIS, CONGENITAL, AUTOSOMAL<br>RECESSIVE                                                                                      |
| 26         | ALOX12B | NM_001139.3    | c.380C>T           | exonic        | 3    | nonsynonymous   | p.Pro127Leu              | 66/276792=0       | LB              |                                                                                                                                                 |
| 180        | ALOX12B | NM_001139.3    | c.526G>A           | exonic        | 4    | nonsynonymous   | p.Glu176Lys              | 92/276916=0       | VOUS            |                                                                                                                                                 |
| 181        | ALOX12B | NM_001139.3    | c.526G>A           | exonic        | 4    | nonsynonymous   | p.Glu176Lys              | 92/276916=0       | VOUS            |                                                                                                                                                 |
| 68         | ALOX12B | NM_001139.3    | c.556A>T           | exonic        | 5    | nonsynonymous   | p.Ile186Phe              | 0                 | VOUS            |                                                                                                                                                 |
| 172        | ALOX12B | NM_001139.3    | c.715A>G           | exonic        | 6    | nonsynonymous   | p.Ile239Val              | 24/277224=0       | VOUS            |                                                                                                                                                 |
| 80         | ALOX12B | NM_001139.3    | c.1156C>T          | exonic        | 9    | nonsynonymous   | p.Arg386Cys              | 9/276770=0        | P               |                                                                                                                                                 |
| 158        | ALOX12B | NM_001139.3    | c.1431delC         | exonic        | 11   | frameshift      | p.Asp477Glufs*37         | 1/245856=0        | P               |                                                                                                                                                 |
| 93         | ALOX12B | NM_001139.3    | c.1565C>T          | exonic        | 12   | nonsynonymous   | p.Pro522Leu              | 277/277210=0.001  | VOUS            |                                                                                                                                                 |
| 4          | ALOXE3  | NM_001165960.1 | c.62C>T            | exonic        | 1    | nonsynonymous   | p.Pro21Leu               | 16/168304=0       | VOUS            |                                                                                                                                                 |

|     |         |                |           |        |                  |             |                   |      |                                                                                                                                                                                               |
|-----|---------|----------------|-----------|--------|------------------|-------------|-------------------|------|-----------------------------------------------------------------------------------------------------------------------------------------------------------------------------------------------|
| 13  | ALOXE3  | NM_001165960.1 | c.30G>T   | exonic | 1 nonsynonymous  | p.Leu10Phe  |                   | VOUS | # 606545<br>ICHTHYOSIS, CONGENITAL, AUTOSOMAL<br>RECESSIVE 3; ARC13                                                                                                                           |
| 45  | ALOXE3  | NM_001165960.1 | c.280C>G  | exonic | 2 nonsynonymous  | p.Pro94Ala  | 143/182810=0.001  | VOUS |                                                                                                                                                                                               |
| 95  | ALOXE3  | NM_001165960.1 | c.809G>A  | exonic | 4 nonsynonymous  | p.Arg270Gln | 7/246260=0        | VOUS |                                                                                                                                                                                               |
| 138 | ALOXE3  | NM_001165960.1 | c.989T>C  | exonic | 6 nonsynonymous  | p.Ile330Thr | 4/246268=0        | VOUS |                                                                                                                                                                                               |
| 137 | ALOXE3  | NM_001165960.1 | c.1076C>T | exonic | 6 nonsynonymous  | p.Ala359Val | 51/246268=0       | VOUS |                                                                                                                                                                                               |
| 163 | ALOXE3  | NM_001165960.1 | c.1483C>T | exonic | 9 nonsynonymous  | p.Pro495Ser |                   | VOUS |                                                                                                                                                                                               |
| 175 | ALOXE3  | NM_001165960.1 | c.1454T>A | exonic | 9 nonsynonymous  | p.Leu485Gln |                   | LP   |                                                                                                                                                                                               |
| 180 | ALOXE3  | NM_001165960.1 | c.1843C>T | exonic | 12 nonsynonymous | p.His615Tyr |                   | LP   |                                                                                                                                                                                               |
| 190 | ALOXE3  | NM_001165960.1 | c.2102C>A | exonic | 14 nonsynonymous | p.Thr701Asn | 102/276992=0      | VOUS |                                                                                                                                                                                               |
| 190 | ALOXE3  | NM_001165960.1 | c.2404C>T | exonic | 16 nonsynonymous | p.Arg802Trp | 239/277182=0.001  | VOUS |                                                                                                                                                                                               |
| 193 | ALOXE3  | NM_001165960.1 | c.2510T>C | exonic | 16 nonsynonymous | p.Ile837Thr | 333/277202=0.001  | LB   |                                                                                                                                                                                               |
| 194 | ALOXE3  | NM_001165960.1 | c.2510T>C | exonic | 16 nonsynonymous | p.Ile837Thr | 333/277202=0.001  | VOUS |                                                                                                                                                                                               |
| 199 | ALOXE3  | NM_001165960.1 | c.2510T>C | exonic | 16 nonsynonymous | p.Ile837Thr | 333/277202=0.001  | VOUS |                                                                                                                                                                                               |
| 201 | ALOXE3  | NM_001165960.1 | c.2510T>C | exonic | 16 nonsynonymous | p.Ile837Thr | 333/277202=0.001  | VOUS |                                                                                                                                                                                               |
| 3   | CAST    | NM_001750.7    | c.200C>T  | exonic | 3 nonsynonymous  | p.Ser67Leu  | 12/276074=0       | VOUS | # 616295<br>PEELING SKIN WITH LEUKONYCHIA, ACRAL PUNCTATE<br>KERATOSES, CHEILITIS, AND KNUCKLE PADS; PLACK<br>AD                                                                              |
| 149 | CAST    | NM_001750.7    | c.620C>T  | exonic | 9 nonsynonymous  | p.Pro207Leu | 5/246206=0        | VOUS |                                                                                                                                                                                               |
| 98  | CAST    | NM_001750.7    | c.775A>G  | exonic | 11 nonsynonymous | p.Thr259Ala | 943/276512=0.003  | B    |                                                                                                                                                                                               |
| 72  | CAST    | NM_001750.7    | c.986C>G  | exonic | 14 nonsynonymous | p.Ala329Gly | 74/276982=0       | VOUS |                                                                                                                                                                                               |
| 98  | CAST    | NM_001750.7    | c.925A>C  | exonic | 14 nonsynonymous | p.Ile309Leu | 2994/276670=0.011 | B    |                                                                                                                                                                                               |
| 150 | CAST    | NM_001750.7    | c.1177C>T | exonic | 16 nonsynonymous | p.Arg393Cys | 34/276754=0       | LB   |                                                                                                                                                                                               |
| 9   | CAST    | NM_001750.7    | c.1207G>C | exonic | 17 nonsynonymous | p.Ala403Pro | 1334/276854=0.005 | B    |                                                                                                                                                                                               |
| 194 | CAST    | NM_001750.7    | c.1283C>T | exonic | 17 nonsynonymous | p.Thr428Met | 909/277064=0.003  | B    |                                                                                                                                                                                               |
| 12  | CAST    | NM_001750.7    | c.1835A>G | exonic | 25 nonsynonymous | p.Lys612Arg | 585/265502=0.002  | B    | # 146520<br>HYPOTRICHOSIS 2; HYPT2<br>AD # 270300<br>PEELING SKIN SYNDROME 1; PSS1<br>AR                                                                                                      |
| 45  | CAST    | NM_001750.7    | c.1835A>G | exonic | 25 nonsynonymous | p.Lys612Arg | 585/265502=0.002  | B    |                                                                                                                                                                                               |
| 16  | CDSN    | NM_001264.4    | c.32G>A   | exonic | 1 nonsynonymous  | p.Arg11His  | 790/239488=0.003  | B    |                                                                                                                                                                                               |
| 98  | CDSN    | NM_001264.4    | c.32G>A   | exonic | 1 nonsynonymous  | p.Arg11His  | 790/239488=0.003  | B    |                                                                                                                                                                                               |
| 37  | CDSN    | NM_001264.4    | c.475A>G  | exonic | 2 nonsynonymous  | p.Ser159Gly | 47/276174=0       | VOUS |                                                                                                                                                                                               |
| 60  | CDSN    | NM_001264.4    | c.475A>G  | exonic | 2 nonsynonymous  | p.Ser159Gly | 47/276174=0       | VOUS |                                                                                                                                                                                               |
| 77  | CDSN    | NM_001264.4    | c.1302C>A | exonic | 2 nonsynonymous  | p.Ser434Arg | 916/276996=0.003  | B    | # 615023<br>ICHTHYOSIS, CONGENITAL, AUTOSOMAL RECESSIVE 9; ARC19                                                                                                                              |
| 127 | CDSN    | NM_001264.4    | c.782G>T  | exonic | 2 nonsynonymous  | p.Gly261Val |                   | VOUS |                                                                                                                                                                                               |
| 4   | CERS3   | NM_001290341.2 | c.233C>T  | exonic | 6 nonsynonymous  | p.Ser78Leu  |                   | VOUS |                                                                                                                                                                                               |
| 72  | CERS3   | NM_001290341.2 | c.914A>G  | exonic | 13 nonsynonymous | p.His305Arg | 3292/264968=0.012 | VOUS |                                                                                                                                                                                               |
| 86  | CERS3   | NM_001290341.2 | c.914A>G  | exonic | 13 nonsynonymous | p.His305Arg | 3292/264968=0.012 | VOUS |                                                                                                                                                                                               |
| 193 | CERS3   | NM_001290341.2 | c.914A>G  | exonic | 13 nonsynonymous | p.His305Arg | 3292/264968=0.012 | B    |                                                                                                                                                                                               |
| 23  | CERS3   | NM_001290341.2 | c.1151G>A | exonic | 14 nonsynonymous | p.Arg384Lys | 481/277162=0.002  | B    | # 607626<br>ICHTHYOSIS, LEUKOCYTE VACUOLES, ALOPECIA, AND SCLEROSING<br>CHOLANGITIS; ILVASC<br>AR                                                                                             |
| 181 | CLDN1   | NM_021101.5    | c.136A>T  | exonic | 1 nonsynonymous  | p.Met46Leu  | 15/246242=0       | VOUS |                                                                                                                                                                                               |
| 182 | CLDN1   | NM_021101.5    | c.136A>T  | exonic | 1 nonsynonymous  | p.Met46Leu  | 15/246242=0       | VOUS |                                                                                                                                                                                               |
| 144 | CLDN1   | NM_021101.5    | c.278T>C  | exonic | 2 nonsynonymous  | p.Ile93Thr  |                   | VOUS |                                                                                                                                                                                               |
| 31  | CLDN1   | NM_021101.5    | c.631G>A  | exonic | 4 nonsynonymous  | p.Val211Met | 30/277152=0       | VOUS |                                                                                                                                                                                               |
| 81  | CYP4F22 | NM_173483.4    | c.109C>T  | exonic | 3 nonsynonymous  | p.Arg37Cys  | 32/121338=0       | VOUS | # 604777<br>ICHTHYOSIS, CONGENITAL, AUTOSOMAL RECESSIVE 5; ARC15<br><br>Alternative titles; symbols<br>ICHTHYOSIS, NONLAMELLAR AND NONERYTHRODERMIC,<br>CONGENITAL, AUTOSOMAL RECESSIVE; NNCI |
| 94  | CYP4F22 | NM_173483.4    | c.68C>T   | exonic | 3 nonsynonymous  | p.Ala23Val  | 45/277126=0       | VOUS |                                                                                                                                                                                               |
| 52  | CYP4F22 | NM_173483.4    | c.485C>G  | exonic | 6 nonsynonymous  | p.Ala162Gly | 47/277122=0       | VOUS |                                                                                                                                                                                               |
| 190 | CYP4F22 | NM_173483.4    | c.463C>T  | exonic | 6 nonsynonymous  | p.His155Tyr | 121/277112=0      | VOUS |                                                                                                                                                                                               |
| 194 | CYP4F22 | NM_173483.4    | c.463C>T  | exonic | 6 nonsynonymous  | p.His155Tyr | 121/277112=0      | VOUS |                                                                                                                                                                                               |
| 148 | CYP4F22 | NM_173483.4    | c.665G>T  | exonic | 7 nonsynonymous  | p.Cys222Phe |                   | VOUS |                                                                                                                                                                                               |
| 64  | CYP4F22 | NM_173483.4    | c.712G>A  | exonic | 8 nonsynonymous  | p.Ala238Thr |                   | LB   |                                                                                                                                                                                               |
| 199 | CYP4F22 | NM_173483.4    | c.851G>A  | exonic | 8 nonsynonymous  | p.Arg284Gln | 9/276864=0        | VOUS |                                                                                                                                                                                               |
| 59  | CYP4F22 | NM_173483.4    | c.1148C>T | exonic | 11 nonsynonymous | p.Thr383Ile |                   | VOUS | # 614457<br>ICHTHYOSIS, SPASTIC QUADRIPLEGIA, AND<br>IMPAIRED INTELLECTUAL DEVELOPMENT; ISQMR                                                                                                 |
| 67  | ELOVL4  | NM_022726.4    | c.243C>G  | exonic | 2 nonsynonymous  | p.Ile81Met  |                   | VOUS |                                                                                                                                                                                               |
| 61  | ELOVL4  | NM_022726.4    | c.800T>C  | exonic | 6 nonsynonymous  | p.Ile267Thr | 2004/276984=0.007 | LB   |                                                                                                                                                                                               |
| 127 | ELOVL4  | NM_022726.4    | c.800T>C  | exonic | 6 nonsynonymous  | p.Ile267Thr | 2004/276984=0.007 | LB   |                                                                                                                                                                                               |
| 172 | ELOVL4  | NM_022726.4    | c.800T>C  | exonic | 6 nonsynonymous  | p.Ile267Thr | 2004/276984=0.007 | LB   |                                                                                                                                                                                               |
| 204 | ELOVL4  | NM_022726.4    | c.814G>C  | exonic | 6 nonsynonymous  | p.Glu272Gln | 2735/277052=0.01  | LB   |                                                                                                                                                                                               |
| 25  | GJA1    | NM_000165.5    | c.1108C>T | exonic | 2 nonsynonymous  | p.Arg370Cys | 3/245356=0        | VOUS |                                                                                                                                                                                               |
| 32  | GJA1    | NM_000165.5    | c.1109G>A | exonic | 2 nonsynonymous  | p.Arg370His | 1/245340=0        | VOUS |                                                                                                                                                                                               |
| 156 | GJA1    | NM_000165.5    | c.157C>T  | exonic | 2 nonsynonymous  | p.Arg53Cys  | 2/246262=0        | LP   |                                                                                                                                                                                               |
| 63  | GJA1    | NM_000165.5    | c.758C>T  | exonic | 2 nonsynonymous  | p.Ala253Val | 2227/277148=0.008 | LB   |                                                                                                                                                                                               |
| 141 | GJA1    | NM_000165.5    | c.758C>T  | exonic | 2 nonsynonymous  | p.Ala253Val | 2227/277148=0.008 | LB   |                                                                                                                                                                                               |

|     |      |                |                 |        |   |               |                 |                   |      |                                                                                        |
|-----|------|----------------|-----------------|--------|---|---------------|-----------------|-------------------|------|----------------------------------------------------------------------------------------|
| 156 | GJA1 | NM_000165.5    | c.758C>T        | exonic | 2 | nonsynonymous | p.Ala253Val     | 2227/277148=0.008 | LB   |                                                                                        |
| 171 | GJA1 | NM_000165.5    | c.758C>T        | exonic | 2 | nonsynonymous | p.Ala253Val     | 2227/277148=0.008 | LB   |                                                                                        |
| 154 | GJB2 | NM_004004.6    | c.296G>A        | exonic | 2 | nonsynonymous | p.Arg99Lys      |                   | VOUS | # 148210<br>KERATITIS-ICHTHYOSIS-DEAFNESS SYNDROME,<br>AUTOSOMAL DOMINANT; KIDAD<br>AD |
| 145 | GJB2 | NM_004004.6    | c.358_360delGAG | exonic | 2 | inframe       | p.Glu120del     | 20/275990=0       | P    |                                                                                        |
| 166 | GJB2 | NM_004004.6    | c.358_360delGAG | exonic | 2 | inframe       | p.Glu120del     | 20/275990=0       | P    |                                                                                        |
| 6   | GJB2 | NM_004004.6    | c.35delG        | exonic | 2 | frameshift    | p.Gly12Valfs*2  | 1721/275002=0.006 | P    |                                                                                        |
| 35  | GJB2 | NM_004004.6    | c.35delG        | exonic | 2 | frameshift    | p.Gly12Valfs*2  | 1721/275002=0.006 | P    |                                                                                        |
| 71  | GJB2 | NM_004004.6    | c.35delG        | exonic | 2 | frameshift    | p.Gly12Valfs*2  | 1721/275002=0.006 | P    |                                                                                        |
| 84  | GJB2 | NM_004004.6    | c.35delG        | exonic | 2 | frameshift    | p.Gly12Valfs*2  | 1721/275002=0.006 | P    |                                                                                        |
| 103 | GJB2 | NM_004004.6    | c.35delG        | exonic | 2 | frameshift    | p.Gly12Valfs*2  | 1721/275002=0.006 | P    |                                                                                        |
| 117 | GJB2 | NM_004004.6    | c.35delG        | exonic | 2 | frameshift    | p.Gly12Valfs*2  | 1721/275002=0.006 | P    |                                                                                        |
| 151 | GJB2 | NM_004004.6    | c.35delG        | exonic | 2 | frameshift    | p.Gly12Valfs*2  | 1721/275002=0.006 | P    |                                                                                        |
| 185 | GJB2 | NM_004004.6    | c.35delG        | exonic | 2 | frameshift    | p.Gly12Valfs*2  | 1721/275002=0.006 | P    |                                                                                        |
| 198 | GJB2 | NM_004004.6    | c.35delG        | exonic | 2 | frameshift    | p.Gly12Valfs*2  | 1721/275002=0.006 | P    |                                                                                        |
| 202 | GJB2 | NM_004004.6    | c.35delG        | exonic | 2 | frameshift    | p.Gly12Valfs*2  | 1721/275002=0.006 | P    |                                                                                        |
| 204 | GJB2 | NM_004004.6    | c.35delG        | exonic | 2 | frameshift    | p.Gly12Valfs*2  | 1721/275002=0.006 | P    |                                                                                        |
| 205 | GJB2 | NM_004004.6    | c.35delG        | exonic | 2 | frameshift    | p.Gly12Valfs*2  | 1721/275002=0.006 | P    |                                                                                        |
| 8   | GJB2 | NM_004004.6    | c.88A>G         | exonic | 2 | nonsynonymous | p.Ile30Val      |                   | LP   |                                                                                        |
| 36  | GJB2 | NM_004004.6    | c.269T>C        | exonic | 2 | nonsynonymous | p.Leu90Pro      | 177/277032=0.001  | P    |                                                                                        |
| 12  | GJB2 | NM_004004.6    | c.101T>C        | exonic | 2 | nonsynonymous | p.Met34Thr      | 2487/276420=0.009 | P    |                                                                                        |
| 17  | GJB2 | NM_004004.6    | c.101T>C        | exonic | 2 | nonsynonymous | p.Met34Thr      | 2487/276420=0.009 | P    |                                                                                        |
| 70  | GJB2 | NM_004004.6    | c.101T>C        | exonic | 2 | nonsynonymous | p.Met34Thr      | 2487/276420=0.009 | P    |                                                                                        |
| 88  | GJB2 | NM_004004.6    | c.101T>C        | exonic | 2 | nonsynonymous | p.Met34Thr      | 2487/276420=0.009 | P    |                                                                                        |
| 159 | GJB2 | NM_004004.6    | c.101T>C        | exonic | 2 | nonsynonymous | p.Met34Thr      | 2487/276420=0.009 | P    |                                                                                        |
| 184 | GJB2 | NM_004004.6    | c.101T>C        | exonic | 2 | nonsynonymous | p.Met34Thr      | 2487/276420=0.009 | P    |                                                                                        |
| 129 | GJB2 | NM_004004.6    | c.23C>T         | exonic | 2 | nonsynonymous | p.Thr8Met       | 21/275096=0       | P    |                                                                                        |
| 20  | GJB2 | NM_004004.6    | c.457G>A        | exonic | 2 | nonsynonymous | p.Val153Ile     | 2433/276862=0.009 | B    |                                                                                        |
| 42  | GJB2 | NM_004004.6    | c.457G>A        | exonic | 2 | nonsynonymous | p.Val153Ile     | 2433/276862=0.009 | B    |                                                                                        |
| 77  | GJB2 | NM_004004.6    | c.457G>A        | exonic | 2 | nonsynonymous | p.Val153Ile     | 2433/276862=0.009 | B    |                                                                                        |
| 79  | GJB2 | NM_004004.6    | c.457G>A        | exonic | 2 | nonsynonymous | p.Val153Ile     | 2433/276862=0.009 | B    |                                                                                        |
| 140 | GJB2 | NM_004004.6    | c.457G>A        | exonic | 2 | nonsynonymous | p.Val153Ile     | 2433/276862=0.009 | B    |                                                                                        |
| 153 | GJB2 | NM_004004.6    | c.467T>A        | exonic | 2 | nonsynonymous | p.Val156Asp     |                   | VOUS |                                                                                        |
| 22  | GJB2 | NM_004004.6    | c.109G>A        | exonic | 2 | nonsynonymous | p.Val37Ile      | 2011/276450=0.007 | P    |                                                                                        |
| 54  | GJB3 | NM_024009.3    | c.196_198delGAC | exonic | 2 | inframe       | p.Asp66del      | 38/277154=0       | VOUS | # 133200<br>ERYTHROKERATODERMIA VARIABILIS ET<br>PROGRESSIVA 1; EKV1<br>AD             |
| 119 | GJB3 | NM_024009.3    | c.196_198delGAC | exonic | 2 | inframe       | p.Asp66del      | 38/277154=0       | VOUS |                                                                                        |
| 150 | GJB3 | NM_024009.3    | c.293G>A        | exonic | 2 | nonsynonymous | p.Arg98His      | 23/276870=0       | VOUS |                                                                                        |
| 166 | GJB3 | NM_024009.3    | c.293G>A        | exonic | 2 | nonsynonymous | p.Arg98His      | 23/276870=0       | VOUS |                                                                                        |
| 24  | GJB3 | NM_024009.3    | c.316C>T        | exonic | 2 | nonsynonymous | p.Arg106Cys     | 40/276618=0       | VOUS |                                                                                        |
| 7   | GJB3 | NM_024009.3    | c.422T>C        | exonic | 2 | nonsynonymous | p.Ile141Thr     |                   | VOUS |                                                                                        |
| 9   | GJB3 | NM_024009.3    | c.529T>G        | exonic | 2 | nonsynonymous | p.Tyr177Asp     | 525/276788=0.002  | LB   |                                                                                        |
| 196 | GJB3 | NM_024009.3    | c.659A>T        | exonic | 2 | nonsynonymous | p.Lys220Met     | 1/246042=0        | VOUS |                                                                                        |
| 168 | GJB3 | NM_024009.3    | c.670C>T        | exonic | 2 | stopgain      | p.Arg224*       | 11/276538=0       | P    | # 617524<br>ERYTHROKERATODERMIA VARIABILIS ET<br>PROGRESSIVA 2; AD                     |
| 3   | GJB4 | NM_153212.3    | c.119C>T        | exonic | 2 | nonsynonymous | p.Ala40Val      | 13/277082=0       | VOUS |                                                                                        |
| 46  | GJB4 | NM_153212.3    | c.478C>T        | exonic | 2 | nonsynonymous | p.Arg160Cys     | 20/276732=0       | VOUS |                                                                                        |
| 180 | GJB4 | NM_153212.3    | c.314A>G        | exonic | 2 | nonsynonymous | p.His105Arg     | 10/277130=0       | VOUS |                                                                                        |
| 101 | GJB4 | NM_153212.3    | c.153delT       | exonic | 2 | frameshift    | p.Phe51Leufs*57 | 1464/276392=0.005 | P    |                                                                                        |
| 137 | GJB4 | NM_153212.3    | c.153delT       | exonic | 2 | frameshift    | p.Phe51Leufs*57 | 1464/276392=0.005 | P    |                                                                                        |
| 160 | GJB4 | NM_153212.3    | c.153delT       | exonic | 2 | frameshift    | p.Phe51Leufs*57 | 1464/276392=0.005 | P    |                                                                                        |
| 34  | GJB4 | NM_153212.3    | c.770C>T        | exonic | 2 | nonsynonymous | p.Ser257Leu     | 20/275366=0       | VOUS |                                                                                        |
| 201 | GJB4 | NM_153212.3    | c.389C>T        | exonic | 2 | nonsynonymous | p.Thr130Met     | 30/277058=0       | VOUS |                                                                                        |
| 19  | GJB4 | NM_153212.3    | c.254C>T        | exonic | 2 | nonsynonymous | p.Thr85Met      | 8/245960=0        | LP   |                                                                                        |
| 86  | GJB4 | NM_153212.3    | c.254C>T        | exonic | 2 | nonsynonymous | p.Thr85Met      | 8/245960=0        | LP   |                                                                                        |
| 103 | GJB4 | NM_153212.3    | c.384G>A        | exonic | 2 | stopgain      | p.Trp128*       | 527/277132=0.002  | P    |                                                                                        |
| 151 | GJB4 | NM_153212.3    | c.384G>A        | exonic | 2 | stopgain      | p.Trp128*       | 527/277132=0.002  | P    |                                                                                        |
| 136 | GJB4 | NM_153212.3    | c.386G>A        | exonic | 2 | stopgain      | p.Trp129*       | 59/277112=0       | P    |                                                                                        |
| 130 | GJB6 | NM_001370092.1 | c.212T>C        | exonic | 5 | nonsynonymous | p.Val71Ala      | 110/277050=0      | VOUS | # 129500<br>ECTODERMAL DYSPLASIA 2, CLOUSTON TYPE; ECTD2 AD                            |
| 167 | GJB6 | NM_001370092.1 | c.607A>G        | exonic | 5 | nonsynonymous | p.Met203Val     | 247/277132=0.001  | LB   |                                                                                        |
| 25  | GJB6 | NM_001370092.1 | c.688A>T        | exonic | 5 | nonsynonymous | p.Asn230Tyr     |                   | VOUS |                                                                                        |

|     |        |                |                                  |          |    |               |                    |                   |      |                                                                                                                |
|-----|--------|----------------|----------------------------------|----------|----|---------------|--------------------|-------------------|------|----------------------------------------------------------------------------------------------------------------|
| 11  | KRT1   | NM_006121.4    | c.860T>C                         | exonic   | 3  | nonsynonymous | p.Ile287Thr        | 1/246176=0        | VOUS | # 113800<br>EPIDERMOLYTIC HYPERKERATOSIS 1; EHK1 # 600962<br>PALMOPLANTAR KERATODERMA, NONEPIDERMOLYTIC; NEPPK |
| 34  | KRT1   | NM_006121.4    | c.982A>T                         | exonic   | 5  | nonsynonymous | p.Thr328Ser        | 332/277126=0.001  | LB   |                                                                                                                |
| 10  | KRT1   | NM_006121.4    | c.1294C>T                        | exonic   | 7  | nonsynonymous | p.Arg432Cys        | 143/277212=0.001  | B    |                                                                                                                |
| 157 | KRT1   | NM_006121.4    | c.1390G>A                        | exonic   | 7  | nonsynonymous | p.Asp464Asn        | 1/246258=0        | VOUS |                                                                                                                |
| 178 | KRT1   | NM_006121.4    | c.1693A>G                        | exonic   | 9  | nonsynonymous | p.Ser565Gly        |                   | VOUS |                                                                                                                |
| 77  | KRT1   | NM_006121.4    | c.1894G>A                        | exonic   | 9  | nonsynonymous | p.Val632Met        | 2/245184=0        | VOUS |                                                                                                                |
| 131 | KRT1   | NM_006121.4    | c.1912A>G                        | exonic   | 9  | nonsynonymous | p.Thr638Ala        | 35/276622=0       | LB   | # 609165<br>ICHTHYOSIS WITH CONFETTI; IWC AD # 113800<br>EPIDERMOLYTIC HYPERKERATOSIS; EHK AD-AR               |
| 21  | KRT10  | NM_001379366.1 | c.257G>A                         | exonic   | 1  | nonsynonymous | p.Arg86His         | 397/264258=0.002  | VOUS |                                                                                                                |
| 53  | KRT10  | NM_001379366.1 | c.98C>T                          | exonic   | 1  | nonsynonymous | p.Ser33Phe         | 72/274952=0       | VOUS |                                                                                                                |
| 110 | KRT10  | NM_001379366.1 | c.71G>A                          | exonic   | 1  | nonsynonymous | p.Gly24Glu         | 34/179406=0       | VOUS |                                                                                                                |
| 115 | KRT10  | NM_001379366.1 | c.158G>A                         | exonic   | 1  | nonsynonymous | p.Ser53Asn         | 65/276636=0       | VOUS |                                                                                                                |
| 137 | KRT10  | NM_001379366.1 | c.710+6T>C                       | intronic | 2  |               |                    | 5/277170=0        | VOUS |                                                                                                                |
| 12  | KRT10  | NM_001379366.1 | c.1495T>C                        | exonic   | 7  | nonsynonymous | p.Tyr499His        | 79/97856=0.001    | VOUS |                                                                                                                |
| 23  | KRT10  | NM_001379366.1 | c.1524C>G                        | exonic   | 7  | nonsynonymous | p.Ser508Arg        | 153/101426=0.002  | VOUS |                                                                                                                |
| 88  | KRT10  | NM_001379366.1 | c.1471_1479delCACGGCGGC          | exonic   | 7  | inframe       | p.His491_Gly493del |                   | VOUS |                                                                                                                |
| 124 | KRT10  | NM_001379366.1 | c.1443_1457delAAGCTCCGGCGGCGG    | exonic   | 7  | inframe       | p.Ser482_Gly486del | 1/99466=0         | VOUS |                                                                                                                |
| 144 | KRT10  | NM_001379366.1 | c.1650_1667delCAGCAGCTCCGGCGGCGG | exonic   | 7  | inframe       | p.Ser551_Gly556del | 34/219570=0       | VOUS | # 146800<br>ICHTHYOSIS BULLOSA OF SIEMENS; IBS AD                                                              |
| 22  | KRT2   | NM_000423.3    | c.146G>A                         | exonic   | 1  | nonsynonymous | p.Gly49Asp         | 3/242214=0        | VOUS |                                                                                                                |
| 139 | KRT2   | NM_000423.3    | c.317G>A                         | exonic   | 1  | nonsynonymous | p.Ser106Asn        | 641/254108=0.003  | B    |                                                                                                                |
| 160 | KRT2   | NM_000423.3    | c.767A>G                         | exonic   | 2  | nonsynonymous | p.Asn256Ser        | 110/277226=0      | LB   |                                                                                                                |
| 192 | KRT2   | NM_000423.3    | c.767A>G                         | exonic   | 2  | nonsynonymous | p.Asn256Ser        | 110/277226=0      | LB   |                                                                                                                |
| 27  | KRT2   | NM_000423.3    | c.1550C>G                        | exonic   | 9  | nonsynonymous | p.Ala517Gly        | 993/277108=0.004  | LB   |                                                                                                                |
| 33  | KRT2   | NM_000423.3    | c.1550C>G                        | exonic   | 9  | nonsynonymous | p.Ala517Gly        | 993/277108=0.004  | LB   |                                                                                                                |
| 152 | KRT2   | NM_000423.3    | c.1750A>G                        | exonic   | 9  | nonsynonymous | p.Ile584Val        |                   | VOUS |                                                                                                                |
| 38  | KRT9   | NM_000226.4    | c.245G>A                         | exonic   | 1  | nonsynonymous | p.Ser82Asn         | 628/274158=0.002  | VOUS | # 144200<br>PALMOPLANTAR KERATODERMA, EPIDERMOLYTIC; EPPK AD                                                   |
| 73  | KRT9   | NM_000226.4    | c.245G>A                         | exonic   | 1  | nonsynonymous | p.Ser82Asn         | 628/274158=0.002  | VOUS |                                                                                                                |
| 122 | KRT9   | NM_000226.4    | c.245G>A                         | exonic   | 1  | nonsynonymous | p.Ser82Asn         | 628/274158=0.002  | VOUS |                                                                                                                |
| 39  | KRT9   | NM_000226.4    | c.245G>A                         | exonic   | 1  | nonsynonymous | p.Ser82Asn         | 628/274158=0.002  | VOUS |                                                                                                                |
| 168 | KRT9   | NM_000226.4    | c.49G>A                          | exonic   | 1  | nonsynonymous | p.Gly17Ser         |                   | VOUS |                                                                                                                |
| 64  | KRT9   | NM_000226.4    | c.1049C>G                        | exonic   | 5  | nonsynonymous | p.Thr350Ser        |                   | VOUS |                                                                                                                |
| 101 | KRT9   | NM_000226.4    | c.1630G>A                        | exonic   | 7  | nonsynonymous | p.Gly544Arg        | 10/179160=0       | VOUS | # 613943<br>ICHTHYOSIS, CONGENITAL, AUTOSOMAL RECESSIVE 8; ARCI8                                               |
| 50  | LIPN   | NM_001102469.1 | c.326A>C                         | exonic   | 3  | nonsynonymous | p.Asp109Ala        | 2/245360=0        | VOUS |                                                                                                                |
| 151 | LIPN   | NM_001102469.1 | c.302delG                        | exonic   | 3  | frameshift    | p.Gly101Glufs*7    | 50/276298=0       | P    |                                                                                                                |
| 183 | LIPN   | NM_001102469.1 | c.633T>G                         | exonic   | 5  | nonsynonymous | p.Ile211Met        | 12/275930=0       | VOUS |                                                                                                                |
| 9   | LIPN   | NM_001102469.1 | c.754C>T                         | exonic   | 6  | nonsynonymous | p.Leu252Phe        | 872/201394=0.004  | B    |                                                                                                                |
| 83  | LIPN   | NM_001102469.1 | c.772G>A                         | exonic   | 6  | nonsynonymous | p.Glu258Lys        | 316/215004=0.001  | LB   |                                                                                                                |
| 171 | LIPN   | NM_001102469.1 | c.772G>A                         | exonic   | 6  | nonsynonymous | p.Glu258Lys        | 316/215004=0.001  | LB   |                                                                                                                |
| 173 | LIPN   | NM_001102469.1 | c.772G>A                         | exonic   | 6  | nonsynonymous | p.Glu258Lys        | 316/215004=0.001  | LB   |                                                                                                                |
| 87  | LIPN   | NM_001102469.1 | c.934G>T                         | exonic   | 8  | nonsynonymous | p.Asp312Tyr        | 1/152140=0        | VOUS | # 612281<br>ICHTHYOSIS, CONGENITAL, AUTOSOMAL RECESSIVE 6; ARCI6 AR                                            |
| 2   | NIPAL4 | NM_001099287.1 | c.86C>A                          | exonic   | 1  | stopgain      | p.Ser29*           | 3/121822=0        | P    |                                                                                                                |
| 104 | NIPAL4 | NM_001099287.1 | c.86C>A                          | exonic   | 1  | stopgain      | p.Ser29*           | 3/121822=0        | P    |                                                                                                                |
| 127 | NIPAL4 | NM_001099287.1 | c.176C>A                         | exonic   | 1  | nonsynonymous | p.Ala59Asp         | 0/242706=0        | VOUS |                                                                                                                |
| 197 | NIPAL4 | NM_001099287.1 | c.176C>A                         | exonic   | 1  | nonsynonymous | p.Ala59Asp         |                   | VOUS |                                                                                                                |
| 58  | NIPAL4 | NM_001099287.1 | c.238C>A                         | exonic   | 2  | nonsynonymous | p.Leu80Ile         |                   | VOUS |                                                                                                                |
| 64  | NIPAL4 | NM_001099287.1 | c.446C>T                         | exonic   | 2  | nonsynonymous | p.Thr149Met        | 294/266230=0.001  | VOUS |                                                                                                                |
| 120 | NIPAL4 | NM_001099287.1 | c.446C>T                         | exonic   | 2  | nonsynonymous | p.Thr149Met        | 294/266230=0.001  | VOUS |                                                                                                                |
| 190 | NIPAL4 | NM_001099287.1 | c.397G>A                         | exonic   | 2  | nonsynonymous | p.Gly133Ser        | 9/277110=0        | VOUS |                                                                                                                |
| 193 | NIPAL4 | NM_001099287.1 | c.397G>A                         | exonic   | 2  | nonsynonymous | p.Gly133Ser        | 9/277110=0        | VOUS |                                                                                                                |
| 204 | NIPAL4 | NM_001099287.1 | c.296T>C                         | exonic   | 2  | nonsynonymous | p.Val99Ala         | 783/277214=0.003  | B    |                                                                                                                |
| 121 | NIPAL4 | NM_001099287.1 | c.581C>T                         | exonic   | 4  | nonsynonymous | p.Thr194Met        | 1/243716=0        | VOUS |                                                                                                                |
| 179 | NIPAL4 | NM_001099287.1 | c.730G>T                         | exonic   | 5  | nonsynonymous | p.Val244Phe        | 170/254010=0.001  | VOUS |                                                                                                                |
| 192 | NIPAL4 | NM_001099287.1 | c.730G>T                         | exonic   | 5  | nonsynonymous | p.Val244Phe        | 170/254010=0.001  | VOUS |                                                                                                                |
| 1   | NIPAL4 | NM_001099287.1 | c.1105G>A                        | exonic   | 6  | nonsynonymous | p.Val369Ile        | 127/276938=0      | VOUS |                                                                                                                |
| 56  | NIPAL4 | NM_001099287.1 | c.965G>A                         | exonic   | 6  | nonsynonymous | p.Arg322Gln        | 10/246210=0       | LP   |                                                                                                                |
| 141 | NIPAL4 | NM_001099287.1 | c.839G>A                         | exonic   | 6  | nonsynonymous | p.Arg280His        | 60/276956=0       | VOUS |                                                                                                                |
| 51  | PEX7   | NM_000288.4    | c.377A>C                         | exonic   | 4  | nonsynonymous | p.Gln126Pr         | 1104/277164=0.004 | VOUS | RHIZOMELIC CHONDRODYSPLASIA PUNCTATA, TYPE 1; RCDP1<br>PEROXISOME BIOGENESIS DISORDER 9; PBD9 AR               |
| 137 | PEX7   | NM_000288.4    | c.961A>T                         | exonic   | 10 | nonsynonymous | p.Ile321Phe        |                   | VOUS |                                                                                                                |
| 167 | PHYH   | NM_001323080.2 | c.56C>T                          | exonic   | 4  | nonsynonymous | p.Thr19Met         | 367/277256=0.001  | VOUS |                                                                                                                |

|     |          |                |                   |          |    |               |             |                   |      |                                                                                                                       |
|-----|----------|----------------|-------------------|----------|----|---------------|-------------|-------------------|------|-----------------------------------------------------------------------------------------------------------------------|
| 156 | PHYH     | NM_001323080.2 | c.301C>G          | exonic   | 6  | nonsynonymous | p.Arg101Gly | 351/277160=0.001  | VOUS | # 266500<br>REFSUM DISEASE, CLASSIC                                                                                   |
| 167 | PHYH     | NM_001323080.2 | c.403G>A          | exonic   | 7  | nonsynonymous | p.Gly135Arg | 2/246256=0        | LP   |                                                                                                                       |
| 111 | PNPLA1   | NM_001374623.1 | c.116C>G          | exonic   | 1  | nonsynonymous | p.Ala39Gly  |                   | VOUS | # 615024<br>ICHTHYOSIS, CONGENITAL, AUTOSOMAL<br>RECESSIVE 10; ARCI10<br>AR                                           |
| 9   | PNPLA1   | NM_001374623.1 | c.383C>T          | exonic   | 2  | nonsynonymous | p.Thr128Met | 397/276794=0.001  | VOUS |                                                                                                                       |
| 125 | PNPLA1   | NM_001374623.1 | c.472T>A          | exonic   | 3  | nonsynonymous | p.Cys158Ser |                   | VOUS |                                                                                                                       |
| 58  | PNPLA1   | NM_001374623.1 | c.592G>T          | exonic   | 4  | nonsynonymous | p.Asp198Tyr |                   | VOUS |                                                                                                                       |
| 107 | PNPLA1   | NM_001374623.1 | c.714+7G>A        | intronic | 4  |               |             | 2/244890=0        | VOUS |                                                                                                                       |
| 85  | PNPLA1   | NM_001374623.1 | c.745G>A          | exonic   | 5  | nonsynonymous | p.Glu249Lys | 803/138609=0.006  | LB   |                                                                                                                       |
| 19  | PNPLA1   | NM_001374623.1 | c.745G>A          | exonic   | 5  | nonsynonymous | p.Glu249Lys | 813/277218=0.003  | LB   |                                                                                                                       |
| 28  | PNPLA1   | NM_001374623.1 | c.745G>A          | exonic   | 5  | nonsynonymous | p.Glu249Lys | 813/277218=0.003  | LB   |                                                                                                                       |
| 44  | PNPLA1   | NM_001374623.1 | c.745G>A          | exonic   | 5  | nonsynonymous | p.Glu249Lys | 813/277218=0.003  | LB   |                                                                                                                       |
| 83  | PNPLA1   | NM_001374623.1 | c.745G>A          | exonic   | 5  | nonsynonymous | p.Glu249Lys | 813/277218=0.003  | LB   |                                                                                                                       |
| 99  | PNPLA1   | NM_001374623.1 | c.745G>A          | exonic   | 5  | nonsynonymous | p.Glu249Lys | 813/277218=0.003  | LB   |                                                                                                                       |
| 103 | PNPLA1   | NM_001374623.1 | c.745G>A          | exonic   | 5  | nonsynonymous | p.Glu249Lys | 813/277218=0.003  | LB   |                                                                                                                       |
| 62  | PNPLA1   | NM_001374623.1 | c.922A>G          | exonic   | 6  | nonsynonymous | p.Thr308Ala |                   | VOUS |                                                                                                                       |
| 160 | PNPLA1   | NM_001374623.1 | c.985T>C          | exonic   | 6  | nonsynonymous | p.Ser329Pro | 615/276868=0.002  | VOUS |                                                                                                                       |
| 30  | PNPLA1   | NM_001374623.1 | c.1464T>A         | exonic   | 7  | stopgain      | p.Tyr488*   | 3104/273832=0.011 | LB   |                                                                                                                       |
| 46  | PNPLA1   | NM_001374623.1 | c.1464T>A         | exonic   | 7  | stopgain      | p.Tyr488*   | 3104/273832=0.011 | LB   |                                                                                                                       |
| 6   | PNPLA1   | NM_001374623.1 | c.1464T>A         | exonic   | 7  | stopgain      | p.Tyr488*   | 3104/273832=0.011 | LB   |                                                                                                                       |
| 18  | PNPLA1   | NM_001374623.1 | c.1464T>A         | exonic   | 7  | stopgain      | p.Tyr488*   | 3104/273832=0.011 | LB   |                                                                                                                       |
| 44  | PNPLA1   | NM_001374623.1 | c.1464T>A         | exonic   | 7  | stopgain      | p.Tyr488*   | 3104/273832=0.011 | LB   |                                                                                                                       |
| 57  | PNPLA1   | NM_001374623.1 | c.1464T>A         | exonic   | 7  | stopgain      | p.Tyr488*   | 3104/273832=0.011 | LB   |                                                                                                                       |
| 78  | PNPLA1   | NM_001374623.1 | c.1464T>A         | exonic   | 7  | stopgain      | p.Tyr488*   | 3104/273832=0.011 | LB   |                                                                                                                       |
| 84  | PNPLA1   | NM_001374623.1 | c.1464T>A         | exonic   | 7  | stopgain      | p.Tyr488*   | 3104/273832=0.011 | LB   |                                                                                                                       |
| 95  | PNPLA1   | NM_001374623.1 | c.1464T>A         | exonic   | 7  | stopgain      | p.Tyr488*   | 3104/273832=0.011 | LB   |                                                                                                                       |
| 105 | PNPLA1   | NM_001374623.1 | c.1464T>A         | exonic   | 7  | stopgain      | p.Tyr488*   | 3104/273832=0.011 | LB   |                                                                                                                       |
| 112 | PNPLA1   | NM_001374623.1 | c.1464T>A         | exonic   | 7  | stopgain      | p.Tyr488*   | 3104/273832=0.011 | LB   |                                                                                                                       |
| 123 | PNPLA1   | NM_001374623.1 | c.1464T>A         | exonic   | 7  | stopgain      | p.Tyr488*   | 3104/273832=0.011 | LB   |                                                                                                                       |
| 142 | PNPLA1   | NM_001374623.1 | c.1464T>A         | exonic   | 7  | stopgain      | p.Tyr488*   | 3104/273832=0.011 | LB   |                                                                                                                       |
| 145 | PNPLA1   | NM_001374623.1 | c.1464T>A         | exonic   | 7  | stopgain      | p.Tyr488*   | 3104/273832=0.011 | LB   |                                                                                                                       |
| 155 | PNPLA1   | NM_001374623.1 | c.1464T>A         | exonic   | 7  | stopgain      | p.Tyr488*   | 3104/273832=0.011 | LB   |                                                                                                                       |
| 161 | PNPLA1   | NM_001374623.1 | c.1464T>A         | exonic   | 7  | stopgain      | p.Tyr488*   | 3104/273832=0.011 | LB   |                                                                                                                       |
| 163 | PNPLA1   | NM_001374623.1 | c.1464T>A         | exonic   | 7  | stopgain      | p.Tyr488*   | 3104/273832=0.011 | LB   |                                                                                                                       |
| 121 | SERPINB7 | NM_003784.4    | c.220T>C          | exonic   | 4  | nonsynonymous | p.Ser74Pro  | 9/247468=0        | VOUS | # 615598<br>PALMOPLANTAR KERATODERMA, NAGASHIMA<br>TYPE; PPKN                                                         |
| 133 | SERPINB7 | NM_003784.4    | c.220T>C          | exonic   | 4  | nonsynonymous | p.Ser74Pro  | 9/247468=0        | VOUS |                                                                                                                       |
| 176 | SERPINB7 | NM_003784.4    | c.220T>C          | exonic   | 4  | nonsynonymous | p.Ser74Pro  | 9/247468=0        | VOUS |                                                                                                                       |
| 192 | SERPINB7 | NM_003784.4    | c.715G>A          | exonic   | 7  | nonsynonymous | p.Val239Ile | 20/276514=0       | VOUS |                                                                                                                       |
| 97  | SERPINB7 | NM_003784.4    | c.833A>G          | exonic   | 8  | nonsynonymous | p.Gln278Arg | 42/275758=0       | VOUS |                                                                                                                       |
| 108 | SERPINB7 | NM_003784.4    | c.833A>G          | exonic   | 8  | nonsynonymous | p.Gln278Arg | 42/275758=0       | VOUS |                                                                                                                       |
| 127 | SERPINB7 | NM_003784.4    | c.992A>C          | exonic   | 8  | nonsynonymous | p.Glu331Ala | 113/276360=0      | VOUS |                                                                                                                       |
| 10  | SERPINB8 | NM_001366198.1 | c.304C>T          | exonic   | 3  | nonsynonymous | p.Pro102Ser | 352/276834=0.001  | LB   | # 617115<br>PEELING SKIN SYNDROME 5; PSS5<br>AR                                                                       |
| 128 | SERPINB8 | NM_001366198.1 | c.254T>G          | exonic   | 3  | nonsynonymous | p.Leu85Trp  | 568/277052=0.002  | VOUS |                                                                                                                       |
| 137 | SERPINB8 | NM_001366198.1 | c.254T>G          | exonic   | 3  | nonsynonymous | p.Leu85Trp  | 568/277052=0.002  | B    |                                                                                                                       |
| 50  | SERPINB8 | NM_001366198.1 | c.872C>G          | exonic   | 7  | nonsynonymous | p.Ala291Gly | 60/277244=0       | VOUS |                                                                                                                       |
| 69  | SERPINB8 | NM_001366198.1 | c.866T>C          | exonic   | 7  | nonsynonymous | p.Ile289Thr | 9/246270=0        | VOUS |                                                                                                                       |
| 109 | SERPINB8 | NM_001366198.1 | c.988G>A          | exonic   | 7  | nonsynonymous | p.Ala330Thr | 61/276742=0       | VOUS |                                                                                                                       |
| 113 | SERPINB8 | NM_001366198.1 | c.1121C>T         | exonic   | 7  | nonsynonymous | p.Pro374Leu | 9/273242=0        | VOUS |                                                                                                                       |
| 65  | SLC27A4  | NM_005094.4    | c.250G>A          | exonic   | 3  | nonsynonymous | p.Val84Ile  | 2/245924=0        | VOUS | # 608649<br>ICHTHYOSIS PREMATUREITY SYNDROME; IPS<br><br>Alternative titles; symbols<br>ICHTHYOSIS CONGENITA IV<br>AR |
| 198 | SLC27A4  | NM_005094.4    | c.742G>A          | exonic   | 5  | nonsynonymous | p.Gly248Ser |                   | LP   |                                                                                                                       |
| 172 | SLC27A4  | NM_005094.4    | c.952C>T          | exonic   | 7  | nonsynonymous | p.Arg318Trp | 28/277118=0       | VOUS |                                                                                                                       |
| 147 | SLC27A4  | NM_005094.4    | c.1300G>A         | exonic   | 9  | nonsynonymous | p.Gly434Ser | 9/245968=0        | VOUS |                                                                                                                       |
| 16  | SLC27A4  | NM_005094.4    | c.1415_1417delAGA | exonic   | 10 | inframe       | p.Lys472del | 8/245700=0        | VOUS |                                                                                                                       |
| 179 | SLC27A4  | NM_005094.4    | c.1788C>G         | exonic   | 13 | nonsynonymous | p.Phe596Leu | 3/246250=0        | VOUS |                                                                                                                       |
| 45  | SNAP29   | NM_004782.4    | c.130T>C          | exonic   | 1  | nonsynonymous | p.Tyr44His  | 649/251920=0.003  | LB   | # 009320<br>CEREBRAL DYSGENESIS, NEUROPATHY, ICHTHYOSIS, AND<br>PALMOPLANTAR KERATODERMA SYNDROME; CEDNIK<br>AR       |
| 137 | SNAP29   | NM_004782.4    | c.113C>T          | exonic   | 1  | nonsynonymous | p.Pro38Leu  | 139/246926=0.001  | B    |                                                                                                                       |
| 65  | SPINK5   | NM_001127698.2 | c.677A>G          | exonic   | 9  | nonsynonymous | p.Lys226Arg | 8/276568=0        | LB   |                                                                                                                       |
| 164 | SPINK5   | NM_001127698.2 | c.1362G>C         | exonic   | 15 | nonsynonymous | p.Glu454Asp | 1/245736=0        | LB   |                                                                                                                       |
| 165 | SPINK5   | NM_001127698.2 | c.1362G>C         | exonic   | 15 | nonsynonymous | p.Glu454Asp | 1/245736=0        | LB   |                                                                                                                       |

|     |         |                |                  |          |    |               |                  |                   |      |                                                                       |
|-----|---------|----------------|------------------|----------|----|---------------|------------------|-------------------|------|-----------------------------------------------------------------------|
| 82  | SPINK5  | NM_001127698.2 | c.1451G>A        | exonic   | 16 | nonsynonymous | p.Arg484Lys      | 343/276350=0.001  | LB   | # 256500<br>NETHERTON SYNDROME; NETH                                  |
| 126 | SPINK5  | NM_001127698.2 | c.1451G>A        | exonic   | 16 | nonsynonymous | p.Arg484Lys      | 343/276350=0.001  | LB   |                                                                       |
| 192 | SPINK5  | NM_001127698.2 | c.1451G>A        | exonic   | 16 | nonsynonymous | p.Arg484Lys      | 343/276350=0.001  | LB   |                                                                       |
| 9   | SPINK5  | NM_001127698.2 | c.1552C>T        | exonic   | 17 | nonsynonymous | p.Arg518Cys      | 879/277134=0.003  | B    |                                                                       |
| 48  | SPINK5  | NM_001127698.2 | c.1964G>A        | exonic   | 21 | nonsynonymous | p.Gly655Asp      | 760/276990=0.003  | LB   |                                                                       |
| 91  | SPINK5  | NM_001127698.2 | c.1964G>A        | exonic   | 21 | nonsynonymous | p.Gly655Asp      | 760/276990=0.003  | LB   |                                                                       |
| 90  | SPINK5  | NM_001127698.2 | c.2243A>G        | exonic   | 24 | nonsynonymous | p.Glu748Gly      | 800/276940=0.003  | B    |                                                                       |
| 97  | SPINK5  | NM_001127698.2 | c.2243A>G        | exonic   | 24 | nonsynonymous | p.Glu748Gly      | 800/276940=0.003  | B    |                                                                       |
| 45  | SPINK5  | NM_001127698.2 | c.2852A>G        | exonic   | 30 | nonsynonymous | p.Asn951Ser      | 1264/277148=0.005 | LB   |                                                                       |
| 100 | SPINK5  | NM_001127698.2 | c.2954T>C        | exonic   | 30 | nonsynonymous | p.Val985Ala      | 982/276828=0.004  | LB   |                                                                       |
| 124 | SPINK5  | NM_001127698.2 | c.2954T>C        | exonic   | 30 | nonsynonymous | p.Val985Ala      | 982/276828=0.004  | LB   |                                                                       |
| 171 | SPINK5  | NM_001127698.2 | c.2852A>G        | exonic   | 30 | nonsynonymous | p.Asn951Ser      | 1264/277148=0.005 | LB   | # 602400<br>ICHTHYOSIS, CONGENITAL, AUTOSOMAL<br>RECESSIVE 11; ARCI11 |
| 52  | SPINK5  | NM_001127698.2 | c.3167T>G        | exonic   | 32 | nonsynonymous | p.Met1056Arg     | 26/246178=0       | VOUS |                                                                       |
| 108 | SPINK5  | NM_001127698.2 | c.3167T>G        | exonic   | 32 | nonsynonymous | p.Met1056Arg     | 26/246178=0       | VOUS |                                                                       |
| 11  | SPINK5  | NM_001127698.2 | c.3256G>A        | exonic   | 33 | nonsynonymous | p.Ala1086Thr     | 9/277070=0        | LB   |                                                                       |
| 186 | ST14    | NM_021978.4    | c.145A>T         | exonic   | 2  | stopgain      | p.Lys49*         |                   | P    |                                                                       |
| 193 | ST14    | NM_021978.4    | c.508G>A         | exonic   | 5  | nonsynonymous | p.Glu170Lys      | 521/276770=0.002  | LB   |                                                                       |
| 4   | ST14    | NM_021978.4    | c.508G>A         | exonic   | 5  | nonsynonymous | p.Glu170Lys      | 521/276770=0.002  | LB   |                                                                       |
| 43  | ST14    | NM_021978.4    | c.454A>G         | exonic   | 5  | nonsynonymous | p.Ile152Val      | 876/276060=0.003  | LB   |                                                                       |
| 124 | ST14    | NM_021978.4    | c.454A>G         | exonic   | 5  | nonsynonymous | p.Ile152Val      | 876/276060=0.003  | B    |                                                                       |
| 146 | ST14    | NM_021978.4    | c.508G>A         | exonic   | 5  | nonsynonymous | p.Glu170Lys      | 521/276770=0.002  | VOUS |                                                                       |
| 10  | ST14    | NM_021978.4    | c.830C>T         | exonic   | 7  | nonsynonymous | p.Thr277Met      | 168/254380=0.001  | LB   | # 308100<br>ICHTHYOSIS, X-LINKED; XLI                                 |
| 100 | ST14    | NM_021978.4    | c.800C>A         | exonic   | 7  | nonsynonymous | p.Ser267Tyr      | 2/240850=0        | VOUS |                                                                       |
| 159 | ST14    | NM_021978.4    | c.967C>T         | exonic   | 8  | nonsynonymous | p.Arg323Trp      | 2/246262=0        | VOUS |                                                                       |
| 102 | ST14    | NM_021978.4    | c.1034G>A        | exonic   | 9  | nonsynonymous | p.Arg345His      | 302/277184=0.001  | B    |                                                                       |
| 103 | ST14    | NM_021978.4    | c.1975A>G        | exonic   | 16 | nonsynonymous | p.Ile659Val      | 33/245026=0       | LB   |                                                                       |
| 159 | ST14    | NM_021978.4    | c.1975A>G        | exonic   | 16 | nonsynonymous | p.Ile659Val      | 33/245026=0       | LB   |                                                                       |
| 157 | ST14    | NM_021978.4    | c.2146G>C        | exonic   | 17 | nonsynonymous | p.Glu716Gln      |                   | VOUS |                                                                       |
| 194 | ST14    | NM_021978.4    | c.2406+4G>C      | intronic | 18 |               |                  | 193/212654=0.001  | B    |                                                                       |
| 169 | ST14    | NM_021978.4    | c.2553G>C        | exonic   | 19 | nonsynonymous | p.Glu851Asp      | 6/276830=0        | VOUS |                                                                       |
| 140 | STS     | NM_001320751.2 | c.478C>T         | exonic   | 7  | nonsynonymous | p.His160Tyr      |                   | VOUS | # 617571<br>ICHTHYOSIS, CONGENITAL, AUTOSOMAL<br>RECESSIVE 14; ARCI14 |
| 125 | STS     | NM_001320751.2 | c.1147A>G        | exonic   | 10 | nonsynonymous | p.Ile383Val      | 9/178456=0        | VOUS |                                                                       |
| 162 | STS     | NM_001320751.2 | c.1168C>T        | exonic   | 10 | nonsynonymous | p.Arg390Cys      | 4/178511=0        | VOUS |                                                                       |
| 177 | STS     | NM_001320751.2 | c.1274A>G        | exonic   | 10 | nonsynonymous | p.Asp425Gly      | 184/199731=0.001  | B    |                                                                       |
| 134 | SULT2B1 | NM_004605.2    | c.107T>C         | exonic   | 1  | nonsynonymous | p.Leu36Ser       | 1287/274634=0.005 | B    | # 272200<br>MULTIPLE SULFATASE DEFICIENCY; MSD AR                     |
| 195 | SULT2B1 | NM_004605.2    | c.107T>C         | exonic   | 1  | nonsynonymous | p.Leu36Ser       | 1287/274634=0.005 | B    |                                                                       |
| 140 | SULT2B1 | NM_004605.2    | c.232C>T         | exonic   | 2  | nonsynonymous | p.Arg78Cys       | 252/276636=0.001  | B    |                                                                       |
| 167 | SULT2B1 | NM_004605.2    | c.232C>T         | exonic   | 2  | nonsynonymous | p.Arg78Cys       | 252/276636=0.001  | B    |                                                                       |
| 132 | SULT2B1 | NM_004605.2    | c.600+3G>A       | intronic | 4  |               |                  |                   | VOUS |                                                                       |
| 75  | SULT2B1 | NM_004605.2    | c.673G>A         | exonic   | 5  | nonsynonymous | p.Val225Ile      | 220/272762=0.001  | VOUS |                                                                       |
| 24  | SULT2B1 | NM_004605.2    | c.668G>A         | exonic   | 5  | nonsynonymous | p.Gly223Asp      | 3/272700=0        | VOUS |                                                                       |
| 25  | SULT2B1 | NM_004605.2    | c.867G>A         | exonic   | 6  | nonsynonymous | p.Met289Ile      | 270/262312=0.001  | B    |                                                                       |
| 64  | SULT2B1 | NM_004605.2    | c.1045C>T        | exonic   | 6  | nonsynonymous | p.Pro349Ser      | 100/144788=0.001  | VOUS |                                                                       |
| 202 | SULT2B1 | NM_004605.2    | c.867G>A         | exonic   | 6  | nonsynonymous | p.Met289Ile      | 270/262312=0.001  | B    |                                                                       |
| 204 | SULT2B1 | NM_004605.2    | c.867G>A         | exonic   | 6  | nonsynonymous | p.Met289Ile      | 270/262312=0.001  | B    |                                                                       |
| 137 | SUMF1   | NM_182760.4    | c.59T>G          | exonic   | 1  | nonsynonymous | p.Leu20Ar        | 988/267246=0.004  | B    | # 242300<br>ICHTHYOSIS, CONGENITAL, AUTOSOMAL<br>RECESSIVE 1; ARCI1   |
| 184 | SUMF1   | NM_182760.4    | c.131G>A         | exonic   | 1  | nonsynonymous | p.Gly44Glu       |                   | VOUS |                                                                       |
| 129 | SUMF1   | NM_182760.4    | c.664G>C         | exonic   | 5  | nonsynonymous | p.Gly222Arg      | 450/277142=0.002  | VOUS |                                                                       |
| 107 | SUMF1   | NM_182760.4    | c.935T>C         | exonic   | 7  | nonsynonymous | p.Val312Ala      |                   | VOUS |                                                                       |
| 59  | TGM1    | NM_000359.3    | c.61A>G          | exonic   | 2  | nonsynonymous | p.Thr21Ala       | 372/276110=0.001  | LB   | # 242300<br>ICHTHYOSIS, CONGENITAL, AUTOSOMAL<br>RECESSIVE 1; ARCI1   |
| 139 | TGM1    | NM_000359.3    | c.90_95dupGCCAGA | exonic   | 2  | inframe       | p.Glu30_Pro31dup | 132/276714=0      | LB   |                                                                       |
| 152 | TGM1    | NM_000359.3    | c.208G>T         | exonic   | 2  | nonsynonymous | p.Gly70Cys       |                   | VOUS |                                                                       |
| 189 | TGM1    | NM_000359.3    | c.208G>T         | exonic   | 2  | nonsynonymous | p.Gly70Cys       |                   | VOUS |                                                                       |
| 5   | TGM1    | NM_000359.3    | c.359C>T         | exonic   | 3  | nonsynonymous | p.Ser120Leu      | 7/245944=0        | VOUS |                                                                       |
| 76  | TGM1    | NM_000359.3    | c.746C>T         | exonic   | 4  | nonsynonymous | p.Pro249Leu      |                   | VOUS |                                                                       |
| 61  | TGM1    | NM_000359.3    | c.680A>G         | exonic   | 4  | nonsynonymous | p.Gln227Arg      |                   | VOUS |                                                                       |
| 179 | TGM1    | NM_000359.3    | c.550C>T         | exonic   | 4  | nonsynonymous | p.Pro184Ser      | 183/277094=0.001  | VOUS |                                                                       |
| 187 | TGM1    | NM_000359.3    | c.550C>T         | exonic   | 4  | nonsynonymous | p.Pro184Ser      | 183/277094=0.001  | LB   |                                                                       |

|              |             |              |          |    |               |             |                  |      |                                                                                      |
|--------------|-------------|--------------|----------|----|---------------|-------------|------------------|------|--------------------------------------------------------------------------------------|
| 42 TGM1      | NM_000359.3 | c.920G>A     | exonic   | 6  | nonsynonymous | p.Arg307Gln | 124/275156=0     | B    |                                                                                      |
| 77 TGM1      | NM_000359.3 | c.1492-19T>A | intronic | 11 |               |             | 7/245872=0       | VOUS |                                                                                      |
| 35 TGM1      | NM_000359.3 | c.1717C>T    | exonic   | 12 | nonsynonymous | p.Arg573Trp | 7/277016=0       | VOUS |                                                                                      |
| 92 TGM1      | NM_000359.3 | c.2338G>A    | exonic   | 15 | nonsynonymous | p.Gly780Ser | 1/246154=0       | VOUS |                                                                                      |
| 124 TGM1     | NM_000359.3 | c.2405A>T    | exonic   | 15 | nonsynonymous | p.Asp802Val | 262/277042=0.001 | B    |                                                                                      |
| 98 VPS33B    | NM_018668.4 | c.97-3C>T    | intronic | 2  |               |             |                  | VOUS | # 620009<br>KERATODERMA-ICHTHYOSIS-DEAFNESS SYNDROME,<br>AUTOSOMAL RECESSIVE; KDIDAR |
| 147 VPS33B   | NM_018668.4 | c.1166G>A    | exonic   | 15 | nonsynonymous | p.Arg389Gln | 590/277118=0.002 | B    |                                                                                      |
| 170 VPS33B   | NM_018668.4 | c.1307A>G    | exonic   | 18 | nonsynonymous | p.Asn436Ser | 15/277084=0      | VOUS |                                                                                      |
| 174 VPS33B   | NM_018668.4 | c.1274G>A    | exonic   | 18 | nonsynonymous | p.Ser425Asn | 350/277058=0.001 | B    |                                                                                      |
| 203 VPS33B   | NM_018668.4 | c.1837A>T    | exonic   | 23 | nonsynonymous | p.Ser613Cys |                  | VOUS |                                                                                      |
| 111 ZMPSTE24 | NM_005857.3 | c.1106G>A    | exonic   | 9  | nonsynonymous | p.Arg369Gln | 199/277132=0.001 | B    | # 275210<br>RESTRICTIVE DERMOPATHY 1; RSDM1 AR                                       |
| 118 ZMPSTE24 | NM_005857.3 | c.1235G>A    | exonic   | 10 | nonsynonymous | p.Arg412His | 11/246164=0      | VOUS |                                                                                      |









c.730G>T



c.3167T>G

Table S2. Number of different rare variants identified in ichthyosis-related genes of 300 unaffected individuals

| GENE    | GenBank #      | Nucleotide variant | gene position | Exon | Presumed effect | Presumed protein variant | gnomAD frequency  |
|---------|----------------|--------------------|---------------|------|-----------------|--------------------------|-------------------|
| ABCA12  | NM_173076.3    | c.300T>G           | exonic        | 3    | nonsynonymous   | p.Asp100Glu              | 6/276566=0        |
| ABCA12  | NM_173076.3    | c.346G>T           | exonic        | 4    | nonsynonymous   | p.Asp116Tyr              | 7/245398=0        |
| ABCA12  | NM_173076.3    | c.485C>T           | exonic        | 5    | nonsynonymous   | p.Ala162Val              | 384/276512=0.001  |
| ABCA12  | NM_173076.3    | c.501G>C           | exonic        | 5    | nonsynonymous   | p.Leu167Phe              |                   |
| ABCA12  | NM_173076.3    | c.539T>C           | exonic        | 6    | nonsynonymous   | p.Ile180Thr              | 3/245112=0        |
| ABCA12  | NM_173076.3    | c.1141G>C          | exonic        | 10   | nonsynonymous   | p.Val381Leu              | 239/277242=0.001  |
| ABCA12  | NM_173076.3    | c.1222T>C          | exonic        | 11   | nonsynonymous   | p.Ser408Pro              | 322/276876=0.001  |
| ABCA12  | NM_173076.3    | c.1446A>C          | exonic        | 12   | nonsynonymous   | p.Glu482Asp              | 29/276918=0       |
| ABCA12  | NM_173076.3    | c.1475A>G          | exonic        | 12   | nonsynonymous   | p.Asn492Ser              | 5/276916=0        |
| ABCA12  | NM_173076.3    | c.1743C>G          | exonic        | 14   | nonsynonymous   | p.Asp581Glu              | 246/277138=0.001  |
| ABCA12  | NM_173076.3    | c.1816G>A          | exonic        | 15   | nonsynonymous   | p.Asp606Asn              | 2/245978=0        |
| ABCA12  | NM_173076.3    | c.2129A>G          | exonic        | 17   | nonsynonymous   | p.Tyr710Cys              | 1/246028=0        |
| ABCA12  | NM_173076.3    | c.2243G>A          | exonic        | 17   | nonsynonymous   | p.Arg748Lys              | 6/245968=0        |
| ABCA12  | NM_173076.3    | c.3098T>C          | exonic        | 22   | nonsynonymous   | p.Ile1033Thr             | 2/245894=0        |
| ABCA12  | NM_173076.3    | c.3481A>T          | exonic        | 24   | nonsynonymous   | p.Met1161Leu             | 363/277160=0.001  |
| ABCA12  | NM_173076.3    | c.4618G>T          | exonic        | 31   | nonsynonymous   | p.Ala1540Ser             | 9/245910=0        |
| ABCA12  | NM_173076.3    | c.5051T>C          | exonic        | 33   | nonsynonymous   | p.Ile1684Thr             | 4/245586=0        |
| ABCA12  | NM_173076.3    | c.5617G>A          | exonic        | 37   | nonsynonymous   | p.Val1873Ile             | 670/276578=0.002  |
| ABCA12  | NM_173076.3    | c.6208G>A          | exonic        | 42   | nonsynonymous   | p.Val2070Ile             | 514/276952=0.002  |
| ABCA12  | NM_173076.3    | c.6704A>C          | exonic        | 45   | nonsynonymous   | p.Glu2235Ala             | 184/277156=0.001  |
| ABCA12  | NM_173076.3    | c.6919A>G          | exonic        | 46   | nonsynonymous   | p.Ile2307Val             | 486/277078=0.002  |
| ABCA12  | NM_173076.3    | c.7631C>T          | exonic        | 52   | nonsynonymous   | p.Thr2544Ile             | 379/276596=0.001  |
| ABHD5   | NM_001365649.1 | c.22A>G            | exonic        | 3    | nonsynonymous   | p.Thr8Ala                | 12/237020=0       |
| ABHD5   | NM_001365649.1 | c.505C>G           | exonic        | 4    | nonsynonymous   | p.Pro169Ala              | 21/277218=0       |
| ABHD5   | NM_001365649.1 | c.883G>T           | exonic        | 7    | stopgain        | p.Glu295*                | 1/121404=0        |
| ALDH3A2 | NM_001031806.2 | c.119A>G           | exonic        | 1    | nonsynonymous   | p.Asp40Gly               | 155/218008=0.001  |
| ALDH3A2 | NM_001031806.2 | c.28C>G            | exonic        | 1    | nonsynonymous   | p.Gln10Glu               | 806/218946=0.004  |
| ALDH3A2 | NM_001031806.2 | c.17G>C            | exonic        | 2    | nonsynonymous   | p.Arg6Pro                | 3/223156=0        |
| ALDH3A2 | NM_001031806.2 | c.661G>A           | exonic        | 4    | nonsynonymous   | p.Asp221Asn              | 1/244348=0        |
| ALDH3A2 | NM_001031806.2 | c.1270C>T          | exonic        | 9    | nonsynonymous   | p.Pro424Ser              | 1205/277210=0.004 |
| ALOX12B | NM_001139.3    | c.280G>A           | exonic        | 2    | nonsynonymous   | p.Gly94Ser               | 2588/264690       |
| ALOX12B | NM_001139.3    | c.380C>T           | exonic        | 3    | nonsynonymous   | p.Pro127Leu              | 66/276792=0       |
| ALOX12B | NM_001139.3    | c.526G>A           | exonic        | 4    | nonsynonymous   | p.Glu176Lys              | 92/276916=0       |
| ALOX12B | NM_001139.3    | c.556A>T           | exonic        | 5    | nonsynonymous   | p.Ile186Phe              | 0                 |
| ALOX12B | NM_001139.3    | c.715A>G           | exonic        | 6    | nonsynonymous   | p.Ile239Val              | 24/277224=0       |
| ALOX12B | NM_001139.3    | c.1156C>T          | exonic        | 9    | nonsynonymous   | p.Arg386Cys              | 9/276770=0        |
| ALOX12B | NM_001139.3    | c.1431delC         | exonic        | 11   | frameshift      | p.Asp477Glufs*37         | 1/245856=0        |
| ALOX12B | NM_001139.3    | c.1565C>T          | exonic        | 12   | nonsynonymous   | p.Pro522Leu              | 277/277210=0.001  |
| ALOXE3  | NM_001165960.1 | c.30G>T            | exonic        | 1    | nonsynonymous   | p.Leu10Phe               |                   |

|         |                |           |        |                  |             |                   |
|---------|----------------|-----------|--------|------------------|-------------|-------------------|
| ALOXE3  | NM_001165960.1 | c.62C>T   | exonic | 1 nonsynonymous  | p.Pro21Leu  | 16/168304=0       |
| ALOXE3  | NM_001165960.1 | c.280C>G  | exonic | 2 nonsynonymous  | p.Pro94Ala  | 143/182810=0.001  |
| ALOXE3  | NM_001165960.1 | c.809G>A  | exonic | 4 nonsynonymous  | p.Arg270Gln | 7/246260=0        |
| ALOXE3  | NM_001165960.1 | c.989T>C  | exonic | 6 nonsynonymous  | p.Ile330Thr | 4/246268=0        |
| ALOXE3  | NM_001165960.1 | c.1076C>T | exonic | 6 nonsynonymous  | p.Ala359Val | 51/246268=0       |
| ALOXE3  | NM_001165960.1 | c.1454T>A | exonic | 9 nonsynonymous  | p.Leu485Gln |                   |
| ALOXE3  | NM_001165960.1 | c.1483C>T | exonic | 9 nonsynonymous  | p.Pro495Ser |                   |
| ALOXE3  | NM_001165960.1 | c.1843C>T | exonic | 12 nonsynonymous | p.His615Tyr |                   |
| ALOXE3  | NM_001165960.1 | c.2102C>A | exonic | 14 nonsynonymous | p.Thr701Asn | 102/276992=0      |
| ALOXE3  | NM_001165960.1 | c.2404C>T | exonic | 16 nonsynonymous | p.Arg802Trp | 239/277182=0.001  |
| ALOXE3  | NM_001165960.1 | c.2510T>C | exonic | 16 nonsynonymous | p.Ile837Thr | 333/277202=0.001  |
| CDSN    | NM_001264.4    | c.32G>A   | exonic | 1 nonsynonymous  | p.Arg11His  | 790/239488=0.003  |
| CDSN    | NM_001264.4    | c.1302C>A | exonic | 2 nonsynonymous  | p.Ser434Arg | 916/276996=0.003  |
| CDSN    | NM_001264.4    | c.475A>G  | exonic | 2 nonsynonymous  | p.Ser159Gly | 47/276174=0       |
| CDSN    | NM_001264.4    | c.782G>T  | exonic | 2 nonsynonymous  | p.Gly261Val |                   |
| CAST    | NM_001750.7    | c.200C>T  | exonic | 3 nonsynonymous  | p.Ser67Leu  | 12/276074=0       |
| CAST    | NM_001750.7    | c.620C>T  | exonic | 9 nonsynonymous  | p.Pro207Leu | 5/246206=0        |
| CAST    | NM_001750.7    | c.775A>G  | exonic | 11 nonsynonymous | p.Thr259Ala | 943/276512=0.003  |
| CAST    | NM_001750.7    | c.925A>C  | exonic | 14 nonsynonymous | p.Ile309Leu | 2994/276670=0.011 |
| CAST    | NM_001750.7    | c.986C>G  | exonic | 14 nonsynonymous | p.Ala329Gly | 74/276982=0       |
| CAST    | NM_001750.7    | c.1177C>T | exonic | 16 nonsynonymous | p.Arg393Cys | 34/276754=0       |
| CAST    | NM_001750.7    | c.1207G>C | exonic | 17 nonsynonymous | p.Ala403Pro | 1334/276854=0.005 |
| CAST    | NM_001750.7    | c.1283C>T | exonic | 17 nonsynonymous | p.Thr428Met | 909/277064=0.003  |
| CAST    | NM_001750.7    | c.1835A>G | exonic | 25 nonsynonymous | p.Lys612Arg | 585/265502=0.002  |
| CLDN1   | NM_021101.5    | c.136A>T  | exonic | 1 nonsynonymous  | p.Met46Leu  | 15/246242=0       |
| CLDN1   | NM_021101.5    | c.278T>C  | exonic | 2 nonsynonymous  | p.Ile93Thr  |                   |
| CLDN1   | NM_021101.5    | c.631G>A  | exonic | 4 nonsynonymous  | p.Val211Met | 30/277152=0       |
| CERS3   | NM_001290341.2 | c.233C>T  | exonic | 6 nonsynonymous  | p.Ser78Leu  |                   |
| CERS3   | NM_001290341.2 | c.914A>G  | exonic | 13 nonsynonymous | p.His305Arg | 3292/264968=0.012 |
| CERS3   | NM_001290341.2 | c.1151G>A | exonic | 14 nonsynonymous | p.Arg384Lys | 481/277162=0.002  |
| CYP4F22 | NM_173483.4    | c.109C>T  | exonic | 3 nonsynonymous  | p.Arg37Cys  | 32/121338=0       |
| CYP4F22 | NM_173483.4    | c.68C>T   | exonic | 3 nonsynonymous  | p.Ala23Val  | 45/277126=0       |
| CYP4F22 | NM_173483.4    | c.463C>T  | exonic | 6 nonsynonymous  | p.His155Tyr | 121/277112=0      |
| CYP4F22 | NM_173483.4    | c.485C>G  | exonic | 6 nonsynonymous  | p.Ala162Gly | 47/277122=0       |
| CYP4F22 | NM_173483.4    | c.665G>T  | exonic | 7 nonsynonymous  | p.Cys222Phe |                   |
| CYP4F22 | NM_173483.4    | c.712G>A  | exonic | 8 nonsynonymous  | p.Ala238Thr |                   |
| CYP4F22 | NM_173483.4    | c.851G>A  | exonic | 8 nonsynonymous  | p.Arg284Gln | 9/276864=0        |
| CYP4F22 | NM_173483.4    | c.1148C>T | exonic | 11 nonsynonymous | p.Thr383Ile |                   |
| ELOVL4  | NM_022726.4    | c.243C>G  | exonic | 2 nonsynonymous  | p.Ile81Met  |                   |
| ELOVL4  | NM_022726.4    | c.800T>C  | exonic | 6 nonsynonymous  | p.Ile267Thr | 2004/276984=0.007 |
| ELOVL4  | NM_022726.4    | c.814G>C  | exonic | 6 nonsynonymous  | p.Glu272Gln | 2735/277052=0.01  |
| GJA1    | NM_000165.5    | c.1108C>T | exonic | 2 nonsynonymous  | p.Arg370Cys | 3/245356=0        |



|       |                |                 |        |                 |                 |                   |
|-------|----------------|-----------------|--------|-----------------|-----------------|-------------------|
| GJA1  | NM_000165.5    | c.1109G>A       | exonic | 2 nonsynonymous | p.Arg370His     | 1/245340=0        |
| GJA1  | NM_000165.5    | c.157C>T        | exonic | 2 nonsynonymous | p.Arg53Cys      | 2/246262=0        |
| GJA1  | NM_000165.5    | c.758C>T        | exonic | 2 nonsynonymous | p.Ala253Val     | 2227/277148=0.008 |
| GJB2  | NM_004004.6    | c.101T>C        | exonic | 2 nonsynonymous | p.Met34Thr      | 2487/276420=0.009 |
| GJB2  | NM_004004.6    | c.109G>A        | exonic | 2 nonsynonymous | p.Val37Ile      | 2011/276450=0.007 |
| GJB2  | NM_004004.6    | c.23C>T         | exonic | 2 nonsynonymous | p.Thr8Met       | 21/275096=0       |
| GJB2  | NM_004004.6    | c.269T>C        | exonic | 2 nonsynonymous | p.Leu90Pro      | 177/277032=0.001  |
| GJB2  | NM_004004.6    | c.296G>A        | exonic | 2 nonsynonymous | p.Arg99Lys      |                   |
| GJB2  | NM_004004.6    | c.358_360delGAG | exonic | 2 inframe       | p.Glu120del     | 20/275990=0       |
| GJB2  | NM_004004.6    | c.35delG        | exonic | 2 frameshift    | p.Gly12Valfs*2  | 1721/275002=0.006 |
| GJB2  | NM_004004.6    | c.457G>A        | exonic | 2 nonsynonymous | p.Val153Ile     | 2433/276862=0.009 |
| GJB2  | NM_004004.6    | c.467T>A        | exonic | 2 nonsynonymous | p.Val156Asp     |                   |
| GJB2  | NM_004004.6    | c.88A>G         | exonic | 2 nonsynonymous | p.Ile30Val      |                   |
| GJB3  | NM_024009.3    | c.196_198delGAC | exonic | 2 inframe       | p.Asp66del      | 38/277154=0       |
| GJB3  | NM_024009.3    | c.293G>A        | exonic | 2 nonsynonymous | p.Arg98His      | 23/276870=0       |
| GJB3  | NM_024009.3    | c.316C>T        | exonic | 2 nonsynonymous | p.Arg106Cys     | 40/276618=0       |
| GJB3  | NM_024009.3    | c.422T>C        | exonic | 2 nonsynonymous | p.Ile141Thr     |                   |
| GJB3  | NM_024009.3    | c.529T>G        | exonic | 2 nonsynonymous | p.Tyr177Asp     | 525/276788=0.002  |
| GJB3  | NM_024009.3    | c.659A>T        | exonic | 2 nonsynonymous | p.Lys220Met     | 1/246042=0        |
| GJB3  | NM_024009.3    | c.670C>T        | exonic | 2 stopgain      | p.Arg224*       | 11/276538=0       |
| GJB4  | NM_153212.3    | c.119C>T        | exonic | 2 nonsynonymous | p.Ala40Val      | 13/277082=0       |
| GJB4  | NM_153212.3    | c.153delT       | exonic | 2 frameshift    | p.Phe51Leufs*57 | 1464/276392=0.005 |
| GJB4  | NM_153212.3    | c.254C>T        | exonic | 2 nonsynonymous | p.Thr85Met      | 8/245960=0        |
| GJB4  | NM_153212.3    | c.314A>G        | exonic | 2 nonsynonymous | p.His105Arg     | 10/277130=0       |
| GJB4  | NM_153212.3    | c.384G>A        | exonic | 2 stopgain      | p.Trp128*       | 527/277132=0.002  |
| GJB4  | NM_153212.3    | c.386G>A        | exonic | 2 stopgain      | p.Trp129*       | 59/277112=0       |
| GJB4  | NM_153212.3    | c.389C>T        | exonic | 2 nonsynonymous | p.Thr130Met     | 30/277058=0       |
| GJB4  | NM_153212.3    | c.478C>T        | exonic | 2 nonsynonymous | p.Arg160Cys     | 20/276732=0       |
| GJB4  | NM_153212.3    | c.770C>T        | exonic | 2 nonsynonymous | p.Ser257Leu     | 20/275366=0       |
| GJB6  | NM_001370092.1 | c.212T>C        | exonic | 5 nonsynonymous | p.Val71Ala      | 110/277050=0      |
| GJB6  | NM_001370092.1 | c.607A>G        | exonic | 5 nonsynonymous | p.Met203Val     | 247/277132=0.001  |
| GJB6  | NM_001370092.1 | c.688A>T        | exonic | 5 nonsynonymous | p.Asn230Tyr     |                   |
| KRT1  | NM_006121.4    | c.860T>C        | exonic | 3 nonsynonymous | p.Ile287Thr     | 1/246176=0        |
| KRT1  | NM_006121.4    | c.982A>T        | exonic | 5 nonsynonymous | p.Thr328Ser     | 332/277126=0.001  |
| KRT1  | NM_006121.4    | c.1294C>T       | exonic | 7 nonsynonymous | p.Arg432Cys     | 143/277212=0.001  |
| KRT1  | NM_006121.4    | c.1390G>A       | exonic | 7 nonsynonymous | p.Asp464Asn     | 1/246258=0        |
| KRT1  | NM_006121.4    | c.1693A>G       | exonic | 9 nonsynonymous | p.Ser565Gly     |                   |
| KRT1  | NM_006121.4    | c.1894G>A       | exonic | 9 nonsynonymous | p.Val632Met     | 2/245184=0        |
| KRT1  | NM_006121.4    | c.1912A>G       | exonic | 9 nonsynonymous | p.Thr638Ala     | 35/276622=0       |
| KRT10 | NM_001379366.1 | c.158G>A        | exonic | 1 nonsynonymous | p.Ser53Asn      | 65/276636=0       |
| KRT10 | NM_001379366.1 | c.257G>A        | exonic | 1 nonsynonymous | p.Arg86His      | 397/264258=0.002  |

|        |                |                                  |          |                  |                    |                   |
|--------|----------------|----------------------------------|----------|------------------|--------------------|-------------------|
| KRT10  | NM_001379366.1 | c.71G>A                          | exonic   | 1 nonsynonymous  | p.Gly24Glu         | 34/179406=0       |
| KRT10  | NM_001379366.1 | c.98C>T                          | exonic   | 1 nonsynonymous  | p.Ser33Phe         | 72/274952=0       |
| KRT10  | NM_001379366.1 | c.710+6T>C                       | intronic | 2                |                    | 5/277170=0        |
| KRT10  | NM_001379366.1 | c.1443_1457delAAGCTCCGGCGGCGG    | exonic   | 7 inframe        | p.Ser482_Gly486del | 1/99466=0         |
| KRT10  | NM_001379366.1 | c.1471_1479delCACGGCGGC          | exonic   | 7 inframe        | p.His491_Gly493del |                   |
| KRT10  | NM_001379366.1 | c.1495T>C                        | exonic   | 7 nonsynonymous  | p.Tyr499His        | 79/97856=0.001    |
| KRT10  | NM_001379366.1 | c.1524C>G                        | exonic   | 7 nonsynonymous  | p.Ser508Arg        | 153/101426=0.002  |
| KRT10  | NM_001379366.1 | c.1650_1667delCAGCAGCTCCGGCGGCGG | exonic   | 7 inframe        | p.Ser551_Gly556del | 34/219570=0       |
| KRT2   | NM_000423.3    | c.146G>A                         | exonic   | 1 nonsynonymous  | p.Gly49Asp         | 3/242214=0        |
| KRT2   | NM_000423.3    | c.317G>A                         | exonic   | 1 nonsynonymous  | p.Ser106Asn        | 641/254108=0.003  |
| KRT2   | NM_000423.3    | c.767A>G                         | exonic   | 2 nonsynonymous  | p.Asn256Ser        | 110/277226=0      |
| KRT2   | NM_000423.3    | c.1550C>G                        | exonic   | 9 nonsynonymous  | p.Ala517Gly        | 993/277108=0.004  |
| KRT2   | NM_000423.3    | c.1750A>G                        | exonic   | 9 nonsynonymous  | p.Ile584Val        |                   |
| KRT9   | NM_000226.4    | c.245G>A                         | exonic   | 1 nonsynonymous  | p.Ser82Asn         | 628/274158=0.002  |
| KRT9   | NM_000226.4    | c.49G>A                          | exonic   | 1 nonsynonymous  | p.Gly17Ser         |                   |
| KRT9   | NM_000226.4    | c.1049C>G                        | exonic   | 5 nonsynonymous  | p.Thr350Ser        |                   |
| KRT9   | NM_000226.4    | c.1630G>A                        | exonic   | 7 nonsynonymous  | p.Gly544Arg        | 10/179160=0       |
| LIPN   | NM_001102469.1 | c.302delG                        | exonic   | 3 frameshift     | p.Gly101Glufs*7    | 50/276298=0       |
| LIPN   | NM_001102469.1 | c.326A>C                         | exonic   | 3 nonsynonymous  | p.Asp109Ala        | 2/245360=0        |
| LIPN   | NM_001102469.1 | c.633T>G                         | exonic   | 5 nonsynonymous  | p.Ile211Met        | 12/275930=0       |
| LIPN   | NM_001102469.1 | c.754C>T                         | exonic   | 6 nonsynonymous  | p.Leu252Phe        | 872/201394=0.004  |
| LIPN   | NM_001102469.1 | c.772G>A                         | exonic   | 6 nonsynonymous  | p.Glu258Lys        | 316/215004=0.001  |
| LIPN   | NM_001102469.1 | c.934G>T                         | exonic   | 8 nonsynonymous  | p.Asp312Tyr        | 1/152140=0        |
| NIPAL4 | NM_001099287.1 | c.176C>A                         | exonic   | 1 nonsynonymous  | p.Ala59Asp         |                   |
| NIPAL4 | NM_001099287.1 | c.86C>A                          | exonic   | 1 stopgain       | p.Ser29*           | 3/121822=0        |
| NIPAL4 | NM_001099287.1 | c.238C>A                         | exonic   | 2 nonsynonymous  | p.Leu80Ile         |                   |
| NIPAL4 | NM_001099287.1 | c.296T>C                         | exonic   | 2 nonsynonymous  | p.Val99Ala         | 783/277214=0.003  |
| NIPAL4 | NM_001099287.1 | c.397G>A                         | exonic   | 2 nonsynonymous  | p.Gly133Ser        | 9/277110=0        |
| NIPAL4 | NM_001099287.1 | c.446C>T                         | exonic   | 2 nonsynonymous  | p.Thr149Met        | 294/266230=0.001  |
| NIPAL4 | NM_001099287.1 | c.581C>T                         | exonic   | 4 nonsynonymous  | p.Thr194Met        | 1/243716=0        |
| NIPAL4 | NM_001099287.1 | c.730G>T                         | exonic   | 5 nonsynonymous  | p.Val244Phe        | 170/254010=0.001  |
| NIPAL4 | NM_001099287.1 | c.1105G>A                        | exonic   | 6 nonsynonymous  | p.Val369Ile        | 127/276938=0      |
| NIPAL4 | NM_001099287.1 | c.839G>A                         | exonic   | 6 nonsynonymous  | p.Arg280His        | 60/276956=0       |
| NIPAL4 | NM_001099287.1 | c.965G>A                         | exonic   | 6 nonsynonymous  | p.Arg322Gln        | 10/246210=0       |
| PEX7   | NM_000288.4    | c.377A>C                         | exonic   | 4 nonsynonymous  | p.Gln126Pr         | 1104/277164=0.004 |
| PEX7   | NM_000288.4    | c.961A>T                         | exonic   | 10 nonsynonymous | p.Ile321Phe        |                   |
| PHYH   | NM_001323080.2 | c.56C>T                          | exonic   | 4 nonsynonymous  | p.Thr19Met         | 367/277256=0.001  |
| PHYH   | NM_001323080.2 | c.301C>G                         | exonic   | 6 nonsynonymous  | p.Arg101Gly        | 351/277160=0.001  |
| PHYH   | NM_001323080.2 | c.403G>A                         | exonic   | 7 nonsynonymous  | p.Gly135Arg        | 2/246256=0        |
| PNPLA1 | NM_001374623.1 | c.116C>G                         | exonic   | 1 nonsynonymous  | p.Ala39Gly         |                   |
| PNPLA1 | NM_001374623.1 | c.383C>T                         | exonic   | 2 nonsynonymous  | p.Thr128Met        | 397/276794=0.001  |

|          |                |                   |          |                  |              |                   |
|----------|----------------|-------------------|----------|------------------|--------------|-------------------|
| PNPLA1   | NM_001374623.1 | c.472T>A          | exonic   | 3 nonsynonymous  | p.Cys158Ser  |                   |
| PNPLA1   | NM_001374623.1 | c.592G>T          | exonic   | 4 nonsynonymous  | p.Asp198Tyr  |                   |
| PNPLA1   | NM_001374623.1 | c.714+7G>A        | intronic | 4                |              | 2/244890=0        |
| PNPLA1   | NM_001374623.1 | c.745G>A          | exonic   | 5 nonsynonymous  | p.Glu249Lys  | 813/277218=0.003  |
| PNPLA1   | NM_001374623.1 | c.922A>G          | exonic   | 6 nonsynonymous  | p.Thr308Ala  |                   |
| PNPLA1   | NM_001374623.1 | c.985T>C          | exonic   | 6 nonsynonymous  | p.Ser329Pro  | 615/276868=0.002  |
| PNPLA1   | NM_001374623.1 | c.1464T>A         | exonic   | 7 stopgain       | p.Tyr488*    | 3104/273832=0.011 |
| SERPINB7 | NM_003784.4    | c.220T>C          | exonic   | 4 nonsynonymous  | p.Ser74Pro   | 9/247468=0        |
| SERPINB7 | NM_003784.4    | c.715G>A          | exonic   | 7 nonsynonymous  | p.Val239Ile  | 20/276514=0       |
| SERPINB7 | NM_003784.4    | c.833A>G          | exonic   | 8 nonsynonymous  | p.Gln278Arg  | 42/275758=0       |
| SERPINB7 | NM_003784.4    | c.992A>C          | exonic   | 8 nonsynonymous  | p.Glu331Ala  | 113/276360=0      |
| SERPINB8 | NM_001366198.1 | c.254T>G          | exonic   | 3 nonsynonymous  | p.Leu85Trp   | 568/277052=0.002  |
| SERPINB8 | NM_001366198.1 | c.304C>T          | exonic   | 3 nonsynonymous  | p.Pro102Ser  | 352/276834=0.001  |
| SERPINB8 | NM_001366198.1 | c.1121C>T         | exonic   | 7 nonsynonymous  | p.Pro374Leu  | 9/273242=0        |
| SERPINB8 | NM_001366198.1 | c.866T>C          | exonic   | 7 nonsynonymous  | p.Ile289Thr  | 9/246270=0        |
| SERPINB8 | NM_001366198.1 | c.872C>G          | exonic   | 7 nonsynonymous  | p.Ala291Gly  | 60/277244=0       |
| SERPINB8 | NM_001366198.1 | c.988G>A          | exonic   | 7 nonsynonymous  | p.Ala330Thr  | 61/276742=0       |
| SNAP29   | NM_004782.4    | c.113C>T          | exonic   | 1 nonsynonymous  | p.Pro38Leu   | 139/246926=0.001  |
| SNAP29   | NM_004782.4    | c.130T>C          | exonic   | 1 nonsynonymous  | p.Tyr44His   | 649/251920=0.003  |
| SLC27A4  | NM_005094.4    | c.250G>A          | exonic   | 3 nonsynonymous  | p.Val84Ile   | 2/245924=0        |
| SLC27A4  | NM_005094.4    | c.742G>A          | exonic   | 5 nonsynonymous  | p.Gly248Ser  |                   |
| SLC27A4  | NM_005094.4    | c.952C>T          | exonic   | 7 nonsynonymous  | p.Arg318Trp  | 28/277118=0       |
| SLC27A4  | NM_005094.4    | c.1300G>A         | exonic   | 9 nonsynonymous  | p.Gly434Ser  | 9/245968=0        |
| SLC27A4  | NM_005094.4    | c.1415_1417delAGA | exonic   | 10 inframe       | p.Lys472del  | 8/245700=0        |
| SLC27A4  | NM_005094.4    | c.1788C>G         | exonic   | 13 nonsynonymous | p.Phe596Leu  | 3/246250=0        |
| SPINK5   | NM_001127698.2 | c.677A>G          | exonic   | 9 nonsynonymous  | p.Lys226Arg  | 8/276568=0        |
| SPINK5   | NM_001127698.2 | c.1362G>C         | exonic   | 15 nonsynonymous | p.Glu454Asp  | 1/245736=0        |
| SPINK5   | NM_001127698.2 | c.1451G>A         | exonic   | 16 nonsynonymous | p.Arg484Lys  | 343/276350=0.001  |
| SPINK5   | NM_001127698.2 | c.1552C>T         | exonic   | 17 nonsynonymous | p.Arg518Cys  | 879/277134=0.003  |
| SPINK5   | NM_001127698.2 | c.1964G>A         | exonic   | 21 nonsynonymous | p.Gly655Asp  | 760/276990=0.003  |
| SPINK5   | NM_001127698.2 | c.2243A>G         | exonic   | 24 nonsynonymous | p.Glu748Gly  | 800/276940=0.003  |
| SPINK5   | NM_001127698.2 | c.2852A>G         | exonic   | 30 nonsynonymous | p.Asn951Ser  | 1264/277148=0.005 |
| SPINK5   | NM_001127698.2 | c.2954T>C         | exonic   | 30 nonsynonymous | p.Val985Ala  | 982/276828=0.004  |
| SPINK5   | NM_001127698.2 | c.3167T>G         | exonic   | 32 nonsynonymous | p.Met1056Arg | 26/246178=0       |
| SPINK5   | NM_001127698.2 | c.3256G>A         | exonic   | 33 nonsynonymous | p.Ala1086Thr | 9/277070=0        |
| ST14     | NM_021978.4    | c.145A>T          | exonic   | 2 stopgain       | p.Lys49*     |                   |
| ST14     | NM_021978.4    | c.454A>G          | exonic   | 5 nonsynonymous  | p.Ile152Val  | 876/276060=0.003  |
| ST14     | NM_021978.4    | c.508G>A          | exonic   | 5 nonsynonymous  | p.Glu170Lys  | 521/276770=0.002  |
| ST14     | NM_021978.4    | c.800C>A          | exonic   | 7 nonsynonymous  | p.Ser267Tyr  | 2/240850=0        |
| ST14     | NM_021978.4    | c.830C>T          | exonic   | 7 nonsynonymous  | p.Thr277Met  | 168/254380=0.001  |
| ST14     | NM_021978.4    | c.967C>T          | exonic   | 8 nonsynonymous  | p.Arg323Trp  | 2/246262=0        |
| ST14     | NM_021978.4    | c.1034G>A         | exonic   | 9 nonsynonymous  | p.Arg345His  | 302/277184=0.001  |

|          |                |                  |          |    |               |                  |                   |
|----------|----------------|------------------|----------|----|---------------|------------------|-------------------|
| ST14     | NM_021978.4    | c.1975A>G        | exonic   | 16 | nonsynonymous | p.Ile659Val      | 33/245026=0       |
| ST14     | NM_021978.4    | c.2146G>C        | exonic   | 17 | nonsynonymous | p.Glu716Gln      |                   |
| ST14     | NM_021978.4    | c.2406+4G>C      | intronic | 18 |               |                  | 193/212654=0.001  |
| ST14     | NM_021978.4    | c.2553G>C        | exonic   | 19 | nonsynonymous | p.Glu851Asp      | 6/276830=0        |
| STS      | NM_001320751.2 | c.478C>T         | exonic   | 7  | nonsynonymous | p.His160Tyr      |                   |
| STS      | NM_001320751.2 | c.1147A>G        | exonic   | 10 | nonsynonymous | p.Ile383Val      | 9/178456=0        |
| STS      | NM_001320751.2 | c.1168C>T        | exonic   | 10 | nonsynonymous | p.Arg390Cys      | 4/178511=0        |
| STS      | NM_001320751.2 | c.1274A>G        | exonic   | 10 | nonsynonymous | p.Asp425Gly      | 184/199731=0.001  |
| SULT2B1  | NM_004605.2    | c.107T>C         | exonic   | 1  | nonsynonymous | p.Leu36Ser       | 1287/274634=0.005 |
| SULT2B1  | NM_004605.2    | c.232C>T         | exonic   | 2  | nonsynonymous | p.Arg78Cys       | 252/276636=0.001  |
| SULT2B1  | NM_004605.2    | c.600+3G>A       | intronic | 4  |               |                  |                   |
| SULT2B1  | NM_004605.2    | c.673G>A         | exonic   | 5  | nonsynonymous | p.Val225Ile      | 220/272762=0.001  |
| SULT2B1  | NM_004605.2    | c.668G>A         | exonic   | 5  | nonsynonymous | p.Gly223Asp      | 3/272700=0        |
| SULT2B1  | NM_004605.2    | c.1045C>T        | exonic   | 6  | nonsynonymous | p.Pro349Ser      | 100/144788=0.001  |
| SULT2B1  | NM_004605.2    | c.867G>A         | exonic   | 6  | nonsynonymous | p.Met289Ile      | 270/262312=0.001  |
| SUMF1    | NM_182760.4    | c.131G>A         | exonic   | 1  | nonsynonymous | p.Gly44Glu       |                   |
| SUMF1    | NM_182760.4    | c.59T>G          | exonic   | 1  | nonsynonymous | p.Leu20Ar        | 988/267246=0.004  |
| SUMF1    | NM_182760.4    | c.664G>C         | exonic   | 5  | nonsynonymous | p.Gly222Arg      | 450/277142=0.002  |
| SUMF1    | NM_182760.4    | c.935T>C         | exonic   | 7  | nonsynonymous | p.Val312Ala      |                   |
| TGM1     | NM_000359.3    | c.208G>T         | exonic   | 2  | nonsynonymous | p.Gly70Cys       |                   |
| TGM1     | NM_000359.3    | c.61A>G          | exonic   | 2  | nonsynonymous | p.Thr21Ala       | 372/276110=0.001  |
| TGM1     | NM_000359.3    | c.90_95dupGCCAGA | exonic   | 2  | inframe       | p.Glu30_Pro31dup | 132/276714=0      |
| TGM1     | NM_000359.3    | c.359C>T         | exonic   | 3  | nonsynonymous | p.Ser120Leu      | 7/245944=0        |
| TGM1     | NM_000359.3    | c.746C>T         | exonic   | 4  | nonsynonymous | p.Pro249Leu      |                   |
| TGM1     | NM_000359.3    | c.550C>T         | exonic   | 4  | nonsynonymous | p.Pro184Ser      | 183/277094=0.001  |
| TGM1     | NM_000359.3    | c.680A>G         | exonic   | 4  | nonsynonymous | p.Gln227Arg      |                   |
| TGM1     | NM_000359.3    | c.920G>A         | exonic   | 6  | nonsynonymous | p.Arg307Gln      | 124/275156=0      |
| TGM1     | NM_000359.3    | c.1492-19T>A     | intronic | 11 |               |                  | 7/245872=0        |
| TGM1     | NM_000359.3    | c.1717C>T        | exonic   | 12 | nonsynonymous | p.Arg573Trp      | 7/277016=0        |
| TGM1     | NM_000359.3    | c.2338G>A        | exonic   | 15 | nonsynonymous | p.Gly780Ser      | 1/246154=0        |
| TGM1     | NM_000359.3    | c.2405A>T        | exonic   | 15 | nonsynonymous | p.Asp802Val      | 262/277042=0.001  |
| VPS33B   | NM_018668.4    | c.97-3C>T        | intronic | 2  |               |                  |                   |
| ZMPSTE24 | NM_005857.3    | c.1106G>A        | exonic   | 9  | nonsynonymous | p.Arg369Gln      | 199/277132=0.001  |
| ZMPSTE24 | NM_005857.3    | c.1235G>A        | exonic   | 10 | nonsynonymous | p.Arg412His      | 11/246164=0       |
| VPS33B   | NM_018668.4    | c.1166G>A        | exonic   | 15 | nonsynonymous | p.Arg389Gln      | 590/277118=0.002  |
| VPS33B   | NM_018668.4    | c.1274G>A        | exonic   | 18 | nonsynonymous | p.Ser425Asn      | 350/277058=0.001  |
| VPS33B   | NM_018668.4    | c.1307A>G        | exonic   | 18 | nonsynonymous | p.Asn436Ser      | 15/277084=0       |
| VPS33B   | NM_018668.4    | c.1837A>T        | exonic   | 23 | nonsynonymous | p.Ser613Cys      |                   |

Table S3. Subjects with at least one rare variant in ichthyosis-related genes among 300 unaffected individuals

| Subject ID | GENE     | GenBank #      | Nucleotide variant | gene position | Exon | Presumed effect | Presumed protein variant | gnomAD frequency  |
|------------|----------|----------------|--------------------|---------------|------|-----------------|--------------------------|-------------------|
| 1          | NIPAL4   | NM_001099287.1 | c.1105G>A          | exonic        | 6    | nonsynonymous   | p.Val369Ile              | 127/276938=0      |
| 2          | NIPAL4   | NM_001099287.1 | c.86C>A            | exonic        | 1    | stopgain        | p.Ser29*                 | 3/121822=0        |
| 3          | CAST     | NM_001750.7    | c.200C>T           | exonic        | 3    | nonsynonymous   | p.Ser67Leu               | 12/276074=0       |
| 3          | GJB4     | NM_153212.3    | c.119C>T           | exonic        | 2    | nonsynonymous   | p.Ala40Val               | 13/277082=0       |
| 4          | ALOXE3   | NM_001165960.1 | c.62C>T            | exonic        | 1    | nonsynonymous   | p.Pro21Leu               | 16/168304=0       |
| 4          | CERS3    | NM_001290341.2 | c.233C>T           | exonic        | 6    | nonsynonymous   | p.Ser78Leu               |                   |
| 4          | ST14     | NM_021978.4    | c.508G>A           | exonic        | 5    | nonsynonymous   | p.Glu170Lys              | 521/276770=0.002  |
| 5          | ABCA12   | NM_173076.3    | c.3098T>C          | exonic        | 22   | nonsynonymous   | p.Ile1033Thr             | 2/245894=0        |
| 5          | TGM1     | NM_000359.3    | c.359C>T           | exonic        | 3    | nonsynonymous   | p.Ser120Leu              | 7/245944=0        |
| 6          | GJB2     | NM_004004.6    | c.35delG           | exonic        | 2    | frameshift      | p.Gly12Valfs*2           | 1721/275002=0.006 |
| 6          | PNPLA1   | NM_001374623.1 | c.1464T>A          | exonic        | 7    | stopgain        | p.Tyr488*                | 3104/273832=0.011 |
| 7          | ABCA12   | NM_173076.3    | c.2129A>G          | exonic        | 17   | nonsynonymous   | p.Tyr710Cys              | 1/246028=0        |
| 7          | GJB3     | NM_024009.3    | c.422T>C           | exonic        | 2    | nonsynonymous   | p.Ile141Thr              |                   |
| 8          | GJB2     | NM_004004.6    | c.88A>G            | exonic        | 2    | nonsynonymous   | p.Ile30Val               |                   |
| 9          | CAST     | NM_001750.7    | c.1207G>C          | exonic        | 17   | nonsynonymous   | p.Ala403Pro              | 1334/276854=0.005 |
| 9          | GJB3     | NM_024009.3    | c.529T>G           | exonic        | 2    | nonsynonymous   | p.Tyr177Asp              | 525/276788=0.002  |
| 9          | LIPN     | NM_001102469.1 | c.754C>T           | exonic        | 6    | nonsynonymous   | p.Leu252Phe              | 872/201394=0.004  |
| 9          | PNPLA1   | NM_001374623.1 | c.383C>T           | exonic        | 2    | nonsynonymous   | p.Thr128Met              | 397/276794=0.001  |
| 9          | SPINK5   | NM_001127698.2 | c.1552C>T          | exonic        | 17   | nonsynonymous   | p.Arg518Cys              | 879/277134=0.003  |
| 10         | KRT1     | NM_006121.4    | c.1294C>T          | exonic        | 7    | nonsynonymous   | p.Arg432Cys              | 143/277212=0.001  |
| 10         | SERPINB8 | NM_001366198.1 | c.304C>T           | exonic        | 3    | nonsynonymous   | p.Pro102Ser              | 352/276834=0.001  |
| 10         | ST14     | NM_021978.4    | c.830C>T           | exonic        | 7    | nonsynonymous   | p.Thr277Met              | 168/254380=0.001  |
| 11         | KRT1     | NM_006121.4    | c.860T>C           | exonic        | 3    | nonsynonymous   | p.Ile287Thr              | 1/246176=0        |
| 11         | SPINK5   | NM_001127698.2 | c.3256G>A          | exonic        | 33   | nonsynonymous   | p.Ala1086Thr             | 9/277070=0        |
| 12         | CAST     | NM_001750.7    | c.1835A>G          | exonic        | 25   | nonsynonymous   | p.Lys612Arg              | 585/265502=0.002  |
| 12         | GJB2     | NM_004004.6    | c.101T>C           | exonic        | 2    | nonsynonymous   | p.Met34Thr               | 2487/276420=0.009 |
| 12         | KRT10    | NM_001379366.1 | c.1495T>C          | exonic        | 7    | nonsynonymous   | p.Tyr499His              | 79/97856=0.001    |
| 13         | ALOXE3   | NM_001165960.1 | c.30G>T            | exonic        | 1    | nonsynonymous   | p.Leu10Phe               |                   |
| 14         | ABCA12   | NM_173076.3    | c.2243G>A          | exonic        | 17   | nonsynonymous   | p.Arg748Lys              | 6/245968=0        |
| 15         | ABCA12   | NM_173076.3    | c.1816G>A          | exonic        | 15   | nonsynonymous   | p.Asp606Asn              | 2/245978=0        |
| 16         | CDSN     | NM_001264.4    | c.32G>A            | exonic        | 1    | nonsynonymous   | p.Arg11His               | 790/239488=0.003  |
| 16         | SLC27A4  | NM_005094.4    | c.1415_1417delAGA  | exonic        | 10   | inframe         | p.Lys472del              | 8/245700=0        |
| 17         | GJB2     | NM_004004.6    | c.101T>C           | exonic        | 2    | nonsynonymous   | p.Met34Thr               | 2487/276420=0.009 |
| 18         | PNPLA1   | NM_001374623.1 | c.1464T>A          | exonic        | 7    | stopgain        | p.Tyr488*                | 3104/273832=0.011 |
| 19         | GJB4     | NM_153212.3    | c.254C>T           | exonic        | 2    | nonsynonymous   | p.Thr85Met               | 8/245960=0        |
| 19         | PNPLA1   | NM_001374623.1 | c.745G>A           | exonic        | 5    | nonsynonymous   | p.Glu249Lys              | 813/277218=0.003  |
| 20         | GJB2     | NM_004004.6    | c.457G>A           | exonic        | 2    | nonsynonymous   | p.Val153Ile              | 2433/276862=0.009 |
| 21         | KRT10    | NM_001379366.1 | c.257G>A           | exonic        | 1    | nonsynonymous   | p.Arg86His               | 397/264258=0.002  |
| 22         | GJB2     | NM_004004.6    | c.109G>A           | exonic        | 2    | nonsynonymous   | p.Val37Ile               | 2011/276450=0.007 |

|    |         |                |           |        |                  |                |                   |
|----|---------|----------------|-----------|--------|------------------|----------------|-------------------|
| 22 | KRT2    | NM_000423.3    | c.146G>A  | exonic | 1 nonsynonymous  | p.Gly49Asp     | 3/242214=0        |
| 23 | CERS3   | NM_001290341.2 | c.1151G>A | exonic | 14 nonsynonymous | p.Arg384Lys    | 481/277162=0.002  |
| 23 | KRT10   | NM_001379366.1 | c.1524C>G | exonic | 7 nonsynonymous  | p.Ser508Arg    | 153/101426=0.002  |
| 24 | GJB3    | NM_024009.3    | c.316C>T  | exonic | 2 nonsynonymous  | p.Arg106Cys    | 40/276618=0       |
| 24 | SULT2B1 | NM_004605.2    | c.668G>A  | exonic | 5 nonsynonymous  | p.Gly223Asp    | 3/272700=0        |
| 25 | GJA1    | NM_000165.5    | c.1108C>T | exonic | 2 nonsynonymous  | p.Arg370Cys    | 3/245356=0        |
| 25 | GJB6    | NM_001370092.1 | c.688A>T  | exonic | 5 nonsynonymous  | p.Asn230Tyr    |                   |
| 25 | SULT2B1 | NM_004605.2    | c.867G>A  | exonic | 6 nonsynonymous  | p.Met289Ile    | 270/262312=0.001  |
| 26 | ALOX12B | NM_001139.3    | c.380C>T  | exonic | 3 nonsynonymous  | p.Pro127Leu    | 66/276792=0       |
| 27 | KRT2    | NM_000423.3    | c.1550C>G | exonic | 9 nonsynonymous  | p.Ala517Gly    | 993/277108=0.004  |
| 28 | PNPLA1  | NM_001374623.1 | c.745G>A  | exonic | 5 nonsynonymous  | p.Glu249Lys    | 813/277218=0.003  |
| 29 | ABCA12  | NM_173076.3    | c.6208G>A | exonic | 42 nonsynonymous | p.Val2070Ile   | 514/276952=0.002  |
| 30 | PNPLA1  | NM_001374623.1 | c.1464T>A | exonic | 7 stopgain       | p.Tyr488*      | 3104/273832=0.011 |
| 31 | CLDN1   | NM_021101.5    | c.631G>A  | exonic | 4 nonsynonymous  | p.Val211Met    | 30/277152=0       |
| 32 | GJA1    | NM_000165.5    | c.1109G>A | exonic | 2 nonsynonymous  | p.Arg370His    | 1/245340=0        |
| 33 | KRT2    | NM_000423.3    | c.1550C>G | exonic | 9 nonsynonymous  | p.Ala517Gly    | 993/277108=0.004  |
| 34 | GJB4    | NM_153212.3    | c.770C>T  | exonic | 2 nonsynonymous  | p.Ser257Leu    | 20/275366=0       |
| 34 | KRT1    | NM_006121.4    | c.982A>T  | exonic | 5 nonsynonymous  | p.Thr328Ser    | 332/277126=0.001  |
| 35 | GJB2    | NM_004004.6    | c.35delG  | exonic | 2 frameshift     | p.Gly12Valfs*2 | 1721/275002=0.006 |
| 35 | TGM1    | NM_000359.3    | c.1717C>T | exonic | 12 nonsynonymous | p.Arg573Trp    | 7/277016=0        |
| 36 | ABCA12  | NM_173076.3    | c.5617G>A | exonic | 37 nonsynonymous | p.Val1873Ile   | 670/276578=0.002  |
| 36 | GJB2    | NM_004004.6    | c.269T>C  | exonic | 2 nonsynonymous  | p.Leu90Pro     | 177/277032=0.001  |
| 37 | CDSN    | NM_001264.4    | c.475A>G  | exonic | 2 nonsynonymous  | p.Ser159Gly    | 47/276174=0       |
| 38 | KRT9    | NM_000226.4    | c.245G>A  | exonic | 1 nonsynonymous  | p.Ser82Asn     | 628/274158=0.002  |
| 39 | KRT9    | NM_000226.4    | c.245G>A  | exonic | 1 nonsynonymous  | p.Ser82Asn     | 628/274158=0.002  |
| 40 | ALDH3A2 | NM_001031806.2 | c.1270C>T | exonic | 9 nonsynonymous  | p.Pro424Ser    | 1205/277210=0.004 |
| 41 | ABCA12  | NM_173076.3    | c.5051T>C | exonic | 33 nonsynonymous | p.Ile1684Thr   | 4/245586=0        |
| 42 | GJB2    | NM_004004.6    | c.457G>A  | exonic | 2 nonsynonymous  | p.Val153Ile    | 2433/276862=0.009 |
| 42 | TGM1    | NM_000359.3    | c.920G>A  | exonic | 6 nonsynonymous  | p.Arg307Gln    | 124/275156=0      |
| 43 | ST14    | NM_021978.4    | c.454A>G  | exonic | 5 nonsynonymous  | p.Ile152Val    | 876/276060=0.003  |
| 44 | PNPLA1  | NM_001374623.1 | c.745G>A  | exonic | 5 nonsynonymous  | p.Glu249Lys    | 813/277218=0.003  |
| 44 | PNPLA1  | NM_001374623.1 | c.1464T>A | exonic | 7 stopgain       | p.Tyr488*      | 3104/273832=0.011 |
| 45 | ALOXE3  | NM_001165960.1 | c.280C>G  | exonic | 2 nonsynonymous  | p.Pro94Ala     | 143/182810=0.001  |
| 45 | CAST    | NM_001750.7    | c.1835A>G | exonic | 25 nonsynonymous | p.Lys612Arg    | 585/265502=0.002  |
| 45 | SNAP29  | NM_004782.4    | c.130T>C  | exonic | 1 nonsynonymous  | p.Tyr44His     | 649/251920=0.003  |
| 45 | SPINK5  | NM_001127698.2 | c.2852A>G | exonic | 30 nonsynonymous | p.Asn951Ser    | 1264/277148=0.005 |
| 46 | GJB4    | NM_153212.3    | c.478C>T  | exonic | 2 nonsynonymous  | p.Arg160Cys    | 20/276732=0       |
| 46 | PNPLA1  | NM_001374623.1 | c.1464T>A | exonic | 7 stopgain       | p.Tyr488*      | 3104/273832=0.011 |
| 47 | ALDH3A2 | NM_001031806.2 | c.17G>C   | exonic | 1 nonsynonymous  | p.Arg6Pro      | 3/223156=0        |
| 48 | SPINK5  | NM_001127698.2 | c.1964G>A | exonic | 21 nonsynonymous | p.Gly655Asp    | 760/276990=0.003  |
| 49 | ABCA12  | NM_173076.3    | c.4618G>T | exonic | 31 nonsynonymous | p.Ala1540Ser   | 9/245910=0        |
| 50 | LIPN    | NM_001102469.1 | c.326A>C  | exonic | 3 nonsynonymous  | p.Asp109Ala    | 2/245360=0        |

|    |          |                |                 |        |                  |                |                   |
|----|----------|----------------|-----------------|--------|------------------|----------------|-------------------|
| 50 | SERPINB8 | NM_001366198.1 | c.872C>G        | exonic | 7 nonsynonymous  | p.Ala291Gly    | 60/277244=0       |
| 51 | PEX7     | NM_000288.4    | c.377A>C        | exonic | 4 nonsynonymous  | p.Gln126Pr     | 1104/277164=0.004 |
| 52 | CYP4F22  | NM_173483.4    | c.485C>G        | exonic | 6 nonsynonymous  | p.Ala162Gly    | 47/277122=0       |
| 52 | SPINK5   | NM_001127698.2 | c.3167T>G       | exonic | 32 nonsynonymous | p.Met1056Arg   | 26/246178=0       |
| 53 | KRT10    | NM_001379366.1 | c.98C>T         | exonic | 1 nonsynonymous  | p.Ser33Phe     | 72/274952=0       |
| 54 | ABCA12   | NM_173076.3    | c.3481A>T       | exonic | 24 nonsynonymous | p.Met1161Leu   | 363/277160=0.001  |
| 54 | GJB3     | NM_024009.3    | c.196_198delGAC | exonic | 2 inframe        | p.Asp66del     | 38/277154=0       |
| 55 | ABCA12   | NM_173076.3    | c.3481A>T       | exonic | 24 nonsynonymous | p.Met1161Leu   | 363/277160=0.001  |
| 55 | ALDH3A2  | NM_001031806.2 | c.17G>C         | exonic | 2 nonsynonymous  | p.Arg6Pro      | 3/223156=0        |
| 56 | NIPAL4   | NM_001099287.1 | c.965G>A        | exonic | 6 nonsynonymous  | p.Arg322Gln    | 10/246210=0       |
| 57 | PNPLA1   | NM_001374623.1 | c.1464T>A       | exonic | 7 stopgain       | p.Tyr488*      | 3104/273832=0.011 |
| 58 | NIPAL4   | NM_001099287.1 | c.238C>A        | exonic | 2 nonsynonymous  | p.Leu80Ile     |                   |
| 58 | PNPLA1   | NM_001374623.1 | c.592G>T        | exonic | 4 nonsynonymous  | p.Asp198Tyr    |                   |
| 59 | CYP4F22  | NM_173483.4    | c.1148C>T       | exonic | 11 nonsynonymous | p.Thr383Ile    |                   |
| 59 | TGM1     | NM_000359.3    | c.61A>G         | exonic | 2 nonsynonymous  | p.Thr21Ala     | 372/276110=0.001  |
| 60 | CDSN     | NM_001264.4    | c.475A>G        | exonic | 2 nonsynonymous  | p.Ser159Gly    | 47/276174=0       |
| 61 | ELOVL4   | NM_022726.4    | c.800T>C        | exonic | 6 nonsynonymous  | p.Ile267Thr    | 2004/276984=0.007 |
| 61 | TGM1     | NM_000359.3    | c.680A>G        | exonic | 4 nonsynonymous  | p.Gln227Arg    |                   |
| 62 | ABCA12   | NM_173076.3    | c.3481A>T       | exonic | 24 nonsynonymous | p.Met1161Leu   | 363/277160=0.001  |
| 62 | PNPLA1   | NM_001374623.1 | c.922A>G        | exonic | 6 nonsynonymous  | p.Thr308Ala    |                   |
| 63 | GJA1     | NM_000165.5    | c.758C>T        | exonic | 2 nonsynonymous  | p.Ala253Val    | 2227/277148=0.008 |
| 64 | CYP4F22  | NM_173483.4    | c.712G>A        | exonic | 8 nonsynonymous  | p.Ala238Thr    |                   |
| 64 | KRT9     | NM_000226.4    | c.1049C>G       | exonic | 5 nonsynonymous  | p.Thr350Ser    |                   |
| 64 | NIPAL4   | NM_001099287.1 | c.446C>T        | exonic | 2 nonsynonymous  | p.Thr149Met    | 294/266230=0.001  |
| 64 | SULT2B1  | NM_004605.2    | c.1045C>T       | exonic | 6 nonsynonymous  | p.Pro349Ser    | 100/144788=0.001  |
| 65 | ABCA12   | NM_173076.3    | c.7631C>T       | exonic | 52 nonsynonymous | p.Thr2544Ile   | 379/276596=0.001  |
| 65 | SLC27A4  | NM_005094.4    | c.250G>A        | exonic | 3 nonsynonymous  | p.Val84Ile     | 2/245924=0        |
| 65 | SPINK5   | NM_001127698.2 | c.677A>G        | exonic | 9 nonsynonymous  | p.Lys226Arg    | 8/276568=0        |
| 66 | ABHD5    | NM_001365649.1 | c.22A>G         | exonic | 3 nonsynonymous  | p.Thr8Ala      | 12/237020=0       |
| 67 | ELOVL4   | NM_022726.4    | c.243C>G        | exonic | 2 nonsynonymous  | p.Ile81Met     |                   |
| 68 | ALOX12B  | NM_001139.3    | c.556A>T        | exonic | 5 nonsynonymous  | p.Ile186Phe    | 0                 |
| 69 | SERPINB8 | NM_001366198.1 | c.866T>C        | exonic | 7 nonsynonymous  | p.Ile289Thr    | 9/246270=0        |
| 70 | GJB2     | NM_004004.6    | c.101T>C        | exonic | 2 nonsynonymous  | p.Met34Thr     | 2487/276420=0.009 |
| 71 | GJB2     | NM_004004.6    | c.35delG        | exonic | 2 frameshift     | p.Gly12Valfs*2 | 1721/275002=0.006 |
| 72 | CAST     | NM_001750.7    | c.986C>G        | exonic | 14 nonsynonymous | p.Ala329Gly    | 74/276982=0       |
| 72 | CERS3    | NM_001290341.2 | c.914A>G        | exonic | 13 nonsynonymous | p.His305Arg    | 3292/264968=0.012 |
| 73 | KRT9     | NM_000226.4    | c.245G>A        | exonic | 1 nonsynonymous  | p.Ser82Asn     | 628/274158=0.002  |
| 74 | ABCA12   | NM_173076.3    | c.346G>T        | exonic | 4 nonsynonymous  | p.Asp116Tyr    | 7/245398=0        |
| 74 | ABHD5    | NM_001365649.1 | c.22A>G         | exonic | 3 nonsynonymous  | p.Thr8Ala      | 12/237020=0       |
| 75 | SULT2B1  | NM_004605.2    | c.673G>A        | exonic | 5 nonsynonymous  | p.Val225Ile    | 220/272762=0.001  |
| 76 | ALDH3A2  | NM_001031806.2 | c.661G>A        | exonic | 4 nonsynonymous  | p.Asp221Asn    | 1/244348=0        |
| 76 | TGM1     | NM_000359.3    | c.746C>T        | exonic | 4 nonsynonymous  | p.Pro249Leu    | NUOVA             |

|     |          |                |                         |          |    |               |                    |                   |
|-----|----------|----------------|-------------------------|----------|----|---------------|--------------------|-------------------|
| 77  | ABCA12   | NM_173076.3    | c.1222T>C               | exonic   | 11 | nonsynonymous | p.Ser408Pro        | 322/276876=0.001  |
| 77  | CDSN     | NM_001264.4    | c.1302C>A               | exonic   | 2  | nonsynonymous | p.Ser434Arg        | 916/276996=0.003  |
| 77  | GJB2     | NM_004004.6    | c.457G>A                | exonic   | 2  | nonsynonymous | p.Val153Ile        | 2433/276862=0.009 |
| 77  | KRT1     | NM_006121.4    | c.1894G>A               | exonic   | 9  | nonsynonymous | p.Val632Met        | 2/245184=0        |
| 77  | TGM1     | NM_000359.3    | c.1492-19T>A            | intronic | 11 |               |                    | 7/245872=0        |
| 78  | PNPLA1   | NM_001374623.1 | c.1464T>A               | exonic   | 7  | stopgain      | p.Tyr488*          | 3104/273832=0.011 |
| 79  | GJB2     | NM_004004.6    | c.457G>A                | exonic   | 2  | nonsynonymous | p.Val153Ile        | 2433/276862=0.009 |
| 80  | ALOX12B  | NM_001139.3    | c.1156C>T               | exonic   | 9  | nonsynonymous | p.Arg386Cys        | 9/276770=0        |
| 81  | CYP4F22  | NM_173483.4    | c.109C>T                | exonic   | 3  | nonsynonymous | p.Arg37Cys         | 32/121338=0       |
| 82  | SPINK5   | NM_001127698.2 | c.1451G>A               | exonic   | 16 | nonsynonymous | p.Arg484Lys        | 343/276350=0.001  |
| 83  | LIPN     | NM_001102469.1 | c.772G>A                | exonic   | 6  | nonsynonymous | p.Glu258Lys        | 316/215004=0.001  |
| 83  | PNPLA1   | NM_001374623.1 | c.745G>A                | exonic   | 5  | nonsynonymous | p.Glu249Lys        | 813/277218=0.003  |
| 84  | GJB2     | NM_004004.6    | c.35delG                | exonic   | 2  | frameshift    | p.Gly12Valfs*2     | 1721/275002=0.006 |
| 84  | PNPLA1   | NM_001374623.1 | c.1464T>A               | exonic   | 7  | stopgain      | p.Tyr488*          | 3104/273832=0.011 |
| 85  | PNPLA1   | NM_001374623.1 | c.745G>A                | exonic   | 5  | nonsynonymous | p.Glu249Lys        | 803/138609=0.006  |
| 86  | CERS3    | NM_001290341.2 | c.914A>G                | exonic   | 13 | nonsynonymous | p.His305Arg        | 3292/264968=0.012 |
| 86  | GJB4     | NM_153212.3    | c.254C>T                | exonic   | 2  | nonsynonymous | p.Thr85Met         | 8/245960=0        |
| 87  | LIPN     | NM_001102469.1 | c.934G>T                | exonic   | 8  | nonsynonymous | p.Asp312Tyr        | 1/152140=0        |
| 88  | GJB2     | NM_004004.6    | c.101T>C                | exonic   | 2  | nonsynonymous | p.Met34Thr         | 2487/276420=0.009 |
| 88  | KRT10    | NM_001379366.1 | c.1471_1479delCACGGCGGC | exonic   | 7  | inframe       | p.His491_Gly493del |                   |
| 89  | ABCA12   | NM_173076.3    | c.1222T>C               | exonic   | 11 | nonsynonymous | p.Ser408Pro        | 322/276876=0.001  |
| 89  | ABCA12   | NM_173076.3    | c.1475A>G               | exonic   | 12 | nonsynonymous | p.Asn492Ser        | 5/276916=0        |
| 89  | ALDH3A2  | NM_001031806.2 | c.119A>G                | exonic   | 1  | nonsynonymous | p.Asp40Gly         | 155/218008=0.001  |
| 90  | SPINK5   | NM_001127698.2 | c.2243A>G               | exonic   | 24 | nonsynonymous | p.Glu748Gly        | 800/276940=0.003  |
| 91  | SPINK5   | NM_001127698.2 | c.1964G>A               | exonic   | 21 | nonsynonymous | p.Gly655Asp        | 760/276990=0.003  |
| 92  | TGM1     | NM_000359.3    | c.2338G>A               | exonic   | 15 | nonsynonymous | p.Gly780Ser        | 1/246154=0        |
| 93  | ALOX12B  | NM_001139.3    | c.1565C>T               | exonic   | 12 | nonsynonymous | p.Pro522Leu        | 277/277210=0.001  |
| 94  | CYP4F22  | NM_173483.4    | c.68C>T                 | exonic   | 3  | nonsynonymous | p.Ala23Val         | 45/277126=0       |
| 95  | ALOXE3   | NM_001165960.1 | c.809G>A                | exonic   | 4  | nonsynonymous | p.Arg270Gln        | 7/246260=0        |
| 95  | PNPLA1   | NM_001374623.1 | c.1464T>A               | exonic   | 7  | stopgain      | p.Tyr488*          | 3104/273832=0.011 |
| 96  | ABHD5    | NM_001365649.1 | c.883G>T                | exonic   | 7  | stopgain      | p.Glu295*          | 1/121404=0        |
| 97  | SERPINB7 | NM_003784.4    | c.833A>G                | exonic   | 8  | nonsynonymous | p.Gln278Arg        | 42/275758=0       |
| 97  | SPINK5   | NM_001127698.2 | c.2243A>G               | exonic   | 24 | nonsynonymous | p.Glu748Gly        | 800/276940=0.003  |
| 98  | CAST     | NM_001750.7    | c.775A>G                | exonic   | 11 | nonsynonymous | p.Thr259Ala        | 943/276512=0.003  |
| 98  | CAST     | NM_001750.7    | c.925A>C                | exonic   | 14 | nonsynonymous | p.Ile309Leu        | 2994/276670=0.011 |
| 98  | CDSN     | NM_001264.4    | c.32G>A                 | exonic   | 1  | nonsynonymous | p.Arg11His         | 790/239488=0.003  |
| 98  | VPS33B   | NM_018668.4    | c.97-3C>T               | intronic | 2  |               |                    |                   |
| 99  | PNPLA1   | NM_001374623.1 | c.745G>A                | exonic   | 5  | nonsynonymous | p.Glu249Lys        | 813/277218=0.003  |
| 100 | SPINK5   | NM_001127698.2 | c.2954T>C               | exonic   | 30 | nonsynonymous | p.Val985Ala        | 982/276828=0.004  |
| 100 | ST14     | NM_021978.4    | c.800C>A                | exonic   | 7  | nonsynonymous | p.Ser267Tyr        | 2/240850=0        |
| 101 | GJB4     | NM_153212.3    | c.153delT               | exonic   | 2  | frameshift    | p.Phe51Leufs*57    | 1464/276392=0.005 |
| 101 | KRT9     | NM_000226.4    | c.1630G>A               | exonic   | 7  | nonsynonymous | p.Gly544Arg        | 10/179160=0       |



|     |          |                |                               |          |                  |                    |                   |
|-----|----------|----------------|-------------------------------|----------|------------------|--------------------|-------------------|
| 102 | ST14     | NM_021978.4    | c.1034G>A                     | exonic   | 9 nonsynonymous  | p.Arg345His        | 302/277184=0.001  |
| 103 | GJB2     | NM_004004.6    | c.35delG                      | exonic   | 2 frameshift     | p.Gly12Valfs*2     | 1721/275002=0.006 |
| 103 | GJB4     | NM_153212.3    | c.384G>A                      | exonic   | 2 stopgain       | p.Trp128*          | 527/277132=0.002  |
| 103 | PNPLA1   | NM_001374623.1 | c.745G>A                      | exonic   | 5 nonsynonymous  | p.Glu249Lys        | 813/277218=0.003  |
| 103 | ST14     | NM_021978.4    | c.1975A>G                     | exonic   | 16 nonsynonymous | p.Ile659Val        | 33/245026=0       |
| 104 | NIPAL4   | NM_001099287.1 | c.86C>A                       | exonic   | 1 stopgain       | p.Ser29*           | 3/121822=0        |
| 105 | PNPLA1   | NM_001374623.1 | c.1464T>A                     | exonic   | 7 stopgain       | p.Tyr488*          | 3104/273832=0.011 |
| 106 | ABCA12   | NM_173076.3    | c.300T>G                      | exonic   | 3 nonsynonymous  | p.Asp100Glu        | 6/276566=0        |
| 107 | PNPLA1   | NM_001374623.1 | c.714+7G>A                    | intronic | 4                |                    | 2/244890=0        |
| 107 | SUMF1    | NM_182760.4    | c.935T>C                      | exonic   | 7 nonsynonymous  | p.Val312Ala        |                   |
| 108 | ABCA12   | NM_173076.3    | c.485C>T                      | exonic   | 5 nonsynonymous  | p.Ala162Val        | 384/276512=0.001  |
| 108 | SERPINB7 | NM_003784.4    | c.833A>G                      | exonic   | 8 nonsynonymous  | p.Gln278Arg        | 42/275758=0       |
| 108 | SPINK5   | NM_001127698.2 | c.3167T>G                     | exonic   | 32 nonsynonymous | p.Met1056Arg       | 26/246178=0       |
| 109 | SERPINB8 | NM_001366198.1 | c.988G>A                      | exonic   | 7 nonsynonymous  | p.Ala330Thr        | 61/276742=0       |
| 110 | KRT10    | NM_001379366.1 | c.71G>A                       | exonic   | 1 nonsynonymous  | p.Gly24Glu         | 34/179406=0       |
| 111 | PNPLA1   | NM_001374623.1 | c.116C>G                      | exonic   | 1 nonsynonymous  | p.Ala39Gly         |                   |
| 111 | ZMPSTE24 | NM_005857.3    | c.1106G>A                     | exonic   | 9 nonsynonymous  | p.Arg369Gln        | 199/277132=0.001  |
| 112 | PNPLA1   | NM_001374623.1 | c.1464T>A                     | exonic   | 7 stopgain       | p.Tyr488*          | 3104/273832=0.011 |
| 113 | SERPINB8 | NM_001366198.1 | c.1121C>T                     | exonic   | 7 nonsynonymous  | p.Pro374Leu        | 9/273242=0        |
| 114 | ABCA12   | NM_173076.3    | c.1743C>G                     | exonic   | 14 nonsynonymous | p.Asp581Glu        | 246/277138=0.001  |
| 115 | KRT10    | NM_001379366.1 | c.158G>A                      | exonic   | 1 nonsynonymous  | p.Ser53Asn         | 65/276636=0       |
| 116 | ALDH3A2  | NM_001031806.2 | c.17G>C                       | exonic   | 1 nonsynonymous  | p.Arg6Pro          | 3/223156=0        |
| 117 | GJB2     | NM_004004.6    | c.35delG                      | exonic   | 2 frameshift     | p.Gly12Valfs*2     | 1721/275002=0.006 |
| 118 | ALDH3A2  | NM_001031806.2 | c.1270C>T                     | exonic   | 9 nonsynonymous  | p.Pro424Ser        | 1205/277210=0.004 |
| 118 | ZMPSTE24 | NM_005857.3    | c.1235G>A                     | exonic   | 10 nonsynonymous | p.Arg412His        | 11/246164=0       |
| 119 | GJB3     | NM_024009.3    | c.196_198delGAC               | exonic   | 2 inframe        | p.Asp66del         | 38/277154=0       |
| 120 | NIPAL4   | NM_001099287.1 | c.446C>T                      | exonic   | 2 nonsynonymous  | p.Thr149Met        | 294/266230=0.001  |
| 121 | NIPAL4   | NM_001099287.1 | c.581C>T                      | exonic   | 4 nonsynonymous  | p.Thr194Met        | 1/243716=0        |
| 121 | SERPINB7 | NM_003784.4    | c.220T>C                      | exonic   | 4 nonsynonymous  | p.Ser74Pro         | 9/247468=0        |
| 122 | KRT9     | NM_000226.4    | c.245G>A                      | exonic   | 1 nonsynonymous  | p.Ser82Asn         | 628/274158=0.002  |
| 123 | PNPLA1   | NM_001374623.1 | c.1464T>A                     | exonic   | 7 stopgain       | p.Tyr488*          | 3104/273832=0.011 |
| 124 | ALOX12B  | NM_001139.3    | c.280G>A                      | exonic   | 2 nonsynonymous  | p.Gly94Ser         | 2588/264690       |
| 124 | KRT10    | NM_001379366.1 | c.1443_1457delAAGCTCCGGCGGCGG | exonic   | 7 inframe        | p.Ser482_Gly486del | 1/99466=0         |
| 124 | SPINK5   | NM_001127698.2 | c.2954T>C                     | exonic   | 30 nonsynonymous | p.Val985Ala        | 982/276828=0.004  |
| 124 | ST14     | NM_021978.4    | c.454A>G                      | exonic   | 5 nonsynonymous  | p.Ile152Val        | 876/276060=0.003  |
| 124 | TGM1     | NM_000359.3    | c.2405A>T                     | exonic   | 15 nonsynonymous | p.Asp802Val        | 262/277042=0.001  |
| 125 | PNPLA1   | NM_001374623.1 | c.472T>A                      | exonic   | 3 nonsynonymous  | p.Cys158Ser        |                   |
| 125 | STS      | NM_001320751.2 | c.1147A>G                     | exonic   | 10 nonsynonymous | p.Ile383Val        | 9/178456=0        |
| 126 | SPINK5   | NM_001127698.2 | c.1451G>A                     | exonic   | 16 nonsynonymous | p.Arg484Lys        | 343/276350=0.001  |
| 127 | CDSN     | NM_001264.4    | c.782G>T                      | exonic   | 2 nonsynonymous  | p.Gly261Val        |                   |
| 127 | ELOVL4   | NM_022726.4    | c.800T>C                      | exonic   | 6 nonsynonymous  | p.Ile267Thr        | 2004/276984=0.007 |
| 127 | NIPAL4   | NM_001099287.1 | c.176C>A                      | exonic   | 1 nonsynonymous  | p.Ala59Asp         | 0/242706=0        |

|     |          |                |                                  |          |                  |                    |                   |
|-----|----------|----------------|----------------------------------|----------|------------------|--------------------|-------------------|
| 127 | SERPINB7 | NM_003784.4    | c.992A>C                         | exonic   | 8 nonsynonymous  | p.Glu331Ala        | 113/276360=0      |
| 128 | SERPINB8 | NM_001366198.1 | c.254T>G                         | exonic   | 3 nonsynonymous  | p.Leu85Trp         | 568/277052=0.002  |
| 129 | GJB2     | NM_004004.6    | c.23C>T                          | exonic   | 2 nonsynonymous  | p.Thr8Met          | 21/275096=0       |
| 129 | SUMF1    | NM_182760.4    | c.664G>C                         | exonic   | 5 nonsynonymous  | p.Gly222Arg        | 450/277142=0.002  |
| 130 | GJB6     | NM_001370092.1 | c.212T>C                         | exonic   | 5 nonsynonymous  | p.Val71Ala         | 110/277050=0      |
| 131 | KRT1     | NM_006121.4    | c.1912A>G                        | exonic   | 9 nonsynonymous  | p.Thr638Ala        | 35/276622=0       |
| 132 | SULT2B1  | NM_004605.2    | c.600+3G>A                       | intronic | 4                |                    |                   |
| 133 | SERPINB7 | NM_003784.4    | c.220T>C                         | exonic   | 4 nonsynonymous  | p.Ser74Pro         | 9/247468=0        |
| 134 | SULT2B1  | NM_004605.2    | c.107T>C                         | exonic   | 1 nonsynonymous  | p.Leu36Ser         | 1287/274634=0.005 |
| 135 | ABHD5    | NM_001365649.1 | c.505C>G                         | exonic   | 4 nonsynonymous  | p.Pro169Ala        | 21/277218=0       |
| 136 | GJB4     | NM_153212.3    | c.386G>A                         | exonic   | 2 stopgain       | p.Trp129*          | 59/277112=0       |
| 137 | ALOXE3   | NM_001165960.1 | c.1076C>T                        | exonic   | 6 nonsynonymous  | p.Ala359Val        | 51/246268=0       |
| 137 | GJB4     | NM_153212.3    | c.153delT                        | exonic   | 2 frameshift     | p.Phe51Leufs*57    | 1464/276392=0.005 |
| 137 | KRT10    | NM_001379366.1 | c.710+6T>C                       | intronic | 2                |                    | 5/277170=0        |
| 137 | PEX7     | NM_000288.4    | c.961A>T                         | exonic   | 10 nonsynonymous | p.Ile321Phe        |                   |
| 137 | SERPINB8 | NM_001366198.1 | c.254T>G                         | exonic   | 3 nonsynonymous  | p.Leu85Trp         | 568/277052=0.002  |
| 137 | SNAP29   | NM_004782.4    | c.113C>T                         | exonic   | 1 nonsynonymous  | p.Pro38Leu         | 139/246926=0.001  |
| 137 | SUMF1    | NM_182760.4    | c.59T>G                          | exonic   | 1 nonsynonymous  | p.Leu20Ar          | 988/267246=0.004  |
| 138 | ALOXE3   | NM_001165960.1 | c.989T>C                         | exonic   | 6 nonsynonymous  | p.Ile330Thr        | 4/246268=0        |
| 139 | KRT2     | NM_000423.3    | c.317G>A                         | exonic   | 1 nonsynonymous  | p.Ser106Asn        | 641/254108=0.003  |
| 139 | TGM1     | NM_000359.3    | c.90_95dupGCCAGA                 | exonic   | 2 inframe        | p.Glu30_Pro31dup   | 132/276714=0      |
| 140 | GJB2     | NM_004004.6    | c.457G>A                         | exonic   | 2 nonsynonymous  | p.Val153Ile        | 2433/276862=0.009 |
| 140 | STS      | NM_001320751.2 | c.478C>T                         | exonic   | 7 nonsynonymous  | p.His160Tyr        |                   |
| 140 | SULT2B1  | NM_004605.2    | c.232C>T                         | exonic   | 2 nonsynonymous  | p.Arg78Cys         | 252/276636=0.001  |
| 141 | ABCA12   | NM_173076.3    | c.1446A>C                        | exonic   | 12 nonsynonymous | p.Glu482Asp        | 29/276918=0       |
| 141 | GJA1     | NM_000165.5    | c.758C>T                         | exonic   | 2 nonsynonymous  | p.Ala253Val        | 2227/277148=0.008 |
| 141 | NIPAL4   | NM_001099287.1 | c.839G>A                         | exonic   | 6 nonsynonymous  | p.Arg280His        | 60/276956=0       |
| 142 | PNPLA1   | NM_001374623.1 | c.1464T>A                        | exonic   | 7 stopgain       | p.Tyr488*          | 3104/273832=0.011 |
| 143 | ALDH3A2  | NM_001031806.2 | c.1270C>T                        | exonic   | 9 nonsynonymous  | p.Pro424Ser        | 1205/277210=0.004 |
| 144 | CLDN1    | NM_021101.5    | c.278T>C                         | exonic   | 2 nonsynonymous  | p.Ile93Thr         |                   |
| 144 | KRT10    | NM_001379366.1 | c.1650_1667delCAGCAGCTCCGGCGGCGG | exonic   | 7 inframe        | p.Ser551_Gly556del | 34/219570=0       |
| 145 | GJB2     | NM_004004.6    | c.358_360delGAG                  | exonic   | 2 inframe        | p.Glu120del        | 20/275990=0       |
| 145 | PNPLA1   | NM_001374623.1 | c.1464T>A                        | exonic   | 7 stopgain       | p.Tyr488*          | 3104/273832=0.011 |
| 146 | ABCA12   | NM_173076.3    | c.485C>T                         | exonic   | 5 nonsynonymous  | p.Ala162Val        | 384/276512=0.001  |
| 146 | ST14     | NM_021978.4    | c.508G>A                         | exonic   | 5 nonsynonymous  | p.Glu170Lys        | 521/276770=0.002  |
| 147 | SLC27A4  | NM_005094.4    | c.1300G>A                        | exonic   | 9 nonsynonymous  | p.Gly434Ser        | 9/245968=0        |
| 147 | VPS33B   | NM_018668.4    | c.1166G>A                        | exonic   | 15 nonsynonymous | p.Arg389Gln        | 590/277118=0.002  |
| 148 | ALDH3A2  | NM_001031806.2 | c.28C>G                          | exonic   | 1 nonsynonymous  | p.Gln10Glu         | 806/218946=0.004  |
| 148 | CYP4F22  | NM_173483.4    | c.665G>T                         | exonic   | 7 nonsynonymous  | p.Cys222Phe        |                   |
| 149 | CAST     | NM_001750.7    | c.620C>T                         | exonic   | 9 nonsynonymous  | p.Pro207Leu        | 5/246206=0        |
| 150 | CAST     | NM_001750.7    | c.1177C>T                        | exonic   | 16 nonsynonymous | p.Arg393Cys        | 34/276754=0       |
| 150 | GJB3     | NM_024009.3    | c.293G>A                         | exonic   | 2 nonsynonymous  | p.Arg98His         | 23/276870=0       |

|     |         |                |                 |        |                  |                  |                   |
|-----|---------|----------------|-----------------|--------|------------------|------------------|-------------------|
| 151 | GJB2    | NM_004004.6    | c.35delG        | exonic | 2 frameshift     | p.Gly12Valfs*2   | 1721/275002=0.006 |
| 151 | GJB4    | NM_153212.3    | c.384G>A        | exonic | 2 stopgain       | p.Trp128*        | 527/277132=0.002  |
| 151 | LIPN    | NM_001102469.1 | c.302delG       | exonic | 3 frameshift     | p.Gly101Glufs*7  | 50/276298=0       |
| 152 | KRT2    | NM_000423.3    | c.1750A>G       | exonic | 9 nonsynonymous  | p.Ile584Val      |                   |
| 152 | TGM1    | NM_000359.3    | c.208G>T        | exonic | 2 nonsynonymous  | p.Gly70Cys       |                   |
| 153 | GJB2    | NM_004004.6    | c.467T>A        | exonic | 2 nonsynonymous  | p.Val156Asp      |                   |
| 154 | GJB2    | NM_004004.6    | c.296G>A        | exonic | 2 nonsynonymous  | p.Arg99Lys       |                   |
| 155 | PNPLA1  | NM_001374623.1 | c.1464T>A       | exonic | 7 stopgain       | p.Tyr488*        | 3104/273832=0.011 |
| 156 | GJA1    | NM_000165.5    | c.758C>T        | exonic | 2 nonsynonymous  | p.Ala253Val      | 2227/277148=0.008 |
| 156 | GJA1    | NM_000165.5    | c.157C>T        | exonic | 2 nonsynonymous  | p.Arg53Cys       | 2/246262=0        |
| 156 | PHYH    | NM_001323080.2 | c.301C>G        | exonic | 6 nonsynonymous  | p.Arg101Gly      | 351/277160=0.001  |
| 157 | KRT1    | NM_006121.4    | c.1390G>A       | exonic | 7 nonsynonymous  | p.Asp464Asn      | 1/246258=0        |
| 157 | ST14    | NM_021978.4    | c.2146G>C       | exonic | 17 nonsynonymous | p.Glu716Gln      |                   |
| 158 | ABCA12  | NM_173076.3    | c.6919A>G       | exonic | 46 nonsynonymous | p.Ile2307Val     | 486/277078=0.002  |
| 158 | ALOX12B | NM_001139.3    | c.1431delC      | exonic | 11 frameshift    | p.Asp477Glufs*37 | 1/245856=0        |
| 159 | GJB2    | NM_004004.6    | c.101T>C        | exonic | 2 nonsynonymous  | p.Met34Thr       | 2487/276420=0.009 |
| 159 | ST14    | NM_021978.4    | c.967C>T        | exonic | 8 nonsynonymous  | p.Arg323Trp      | 2/246262=0        |
| 159 | ST14    | NM_021978.4    | c.1975A>G       | exonic | 16 nonsynonymous | p.Ile659Val      | 33/245026=0       |
| 160 | ABCA12  | NM_173076.3    | c.6919A>G       | exonic | 46 nonsynonymous | p.Ile2307Val     | 486/277078=0.002  |
| 160 | GJB4    | NM_153212.3    | c.153delT       | exonic | 2 frameshift     | p.Phe51Leufs*57  | 1464/276392=0.005 |
| 160 | KRT2    | NM_000423.3    | c.767A>G        | exonic | 2 nonsynonymous  | p.Asn256Ser      | 110/277226=0      |
| 160 | PNPLA1  | NM_001374623.1 | c.985T>C        | exonic | 6 nonsynonymous  | p.Ser329Pro      | 615/276868=0.002  |
| 161 | ABCA12  | NM_173076.3    | c.6919A>G       | exonic | 46 nonsynonymous | p.Ile2307Val     | 486/277078=0.002  |
| 161 | PNPLA1  | NM_001374623.1 | c.1464T>A       | exonic | 7 stopgain       | p.Tyr488*        | 3104/273832=0.011 |
| 162 | STS     | NM_001320751.2 | c.1168C>T       | exonic | 10 nonsynonymous | p.Arg390Cys      | 4/178511=0        |
| 163 | ALOXE3  | NM_001165960.1 | c.1483C>T       | exonic | 9 nonsynonymous  | p.Pro495Ser      |                   |
| 163 | PNPLA1  | NM_001374623.1 | c.1464T>A       | exonic | 7 stopgain       | p.Tyr488*        | 3104/273832=0.011 |
| 164 | SPINK5  | NM_001127698.2 | c.1362G>C       | exonic | 15 nonsynonymous | p.Glu454Asp      | 1/245736=0        |
| 165 | SPINK5  | NM_001127698.2 | c.1362G>C       | exonic | 15 nonsynonymous | p.Glu454Asp      | 1/245736=0        |
| 166 | GJB2    | NM_004004.6    | c.358_360delGAG | exonic | 2 inframe        | p.Glu120del      | 20/275990=0       |
| 166 | GJB3    | NM_024009.3    | c.293G>A        | exonic | 2 nonsynonymous  | p.Arg98His       | 23/276870=0       |
| 167 | GJB6    | NM_001370092.1 | c.607A>G        | exonic | 5 nonsynonymous  | p.Met203Val      | 247/277132=0.001  |
| 167 | PHYH    | NM_001323080.2 | c.56C>T         | exonic | 4 nonsynonymous  | p.Thr19Met       | 367/277256=0.001  |
| 167 | PHYH    | NM_001323080.2 | c.403G>A        | exonic | 7 nonsynonymous  | p.Gly135Arg      | 2/246256=0        |
| 167 | SULT2B1 | NM_004605.2    | c.232C>T        | exonic | 2 nonsynonymous  | p.Arg78Cys       | 252/276636=0.001  |
| 168 | ABCA12  | NM_173076.3    | c.6919A>G       | exonic | 46 nonsynonymous | p.Ile2307Val     | 486/277078=0.002  |
| 168 | GJB3    | NM_024009.3    | c.670C>T        | exonic | 2 stopgain       | p.Arg224*        | 11/276538=0       |
| 168 | KRT9    | NM_000226.4    | c.49G>A         | exonic | 1 nonsynonymous  | p.Gly17Ser       |                   |
| 169 | ST14    | NM_021978.4    | c.2553G>C       | exonic | 19 nonsynonymous | p.Glu851Asp      | 6/276830=0        |
| 170 | VPS33B  | NM_018668.4    | c.1307A>G       | exonic | 18 nonsynonymous | p.Asn436Ser      | 15/277084=0       |
| 171 | GJA1    | NM_000165.5    | c.758C>T        | exonic | 2 nonsynonymous  | p.Ala253Val      | 2227/277148=0.008 |
| 171 | LIPN    | NM_001102469.1 | c.772G>A        | exonic | 6 nonsynonymous  | p.Glu258Lys      | 316/215004=0.001  |

|     |          |                |           |        |    |               |                |                   |
|-----|----------|----------------|-----------|--------|----|---------------|----------------|-------------------|
| 171 | SPINK5   | NM_001127698.2 | c.2852A>G | exonic | 30 | nonsynonymous | p.Asn951Ser    | 1264/277148=0.005 |
| 172 | ABCA12   | NM_173076.3    | c.6704A>C | exonic | 45 | nonsynonymous | p.Glu2235Ala   | 184/277156=0.001  |
| 172 | ALOX12B  | NM_0011139.3   | c.715A>G  | exonic | 6  | nonsynonymous | p.Ile239Val    | 24/277224=0       |
| 172 | ELOVL4   | NM_022726.4    | c.800T>C  | exonic | 6  | nonsynonymous | p.Ile267Thr    | 2004/276984=0.007 |
| 172 | SLC27A4  | NM_005094.4    | c.952C>T  | exonic | 7  | nonsynonymous | p.Arg318Trp    | 28/277118=0       |
| 173 | LIPN     | NM_001102469.1 | c.772G>A  | exonic | 6  | nonsynonymous | p.Glu258Lys    | 316/215004=0.001  |
| 174 | VPS33B   | NM_018668.4    | c.1274G>A | exonic | 18 | nonsynonymous | p.Ser425Asn    | 350/277058=0.001  |
| 175 | ALOXE3   | NM_001165960.1 | c.1454T>A | exonic | 9  | nonsynonymous | p.Leu485Gln    |                   |
| 176 | SERPINB7 | NM_003784.4    | c.220T>C  | exonic | 4  | nonsynonymous | p.Ser74Pro     | 9/247468=0        |
| 177 | STS      | NM_001320751.2 | c.1274A>G | exonic | 10 | nonsynonymous | p.Asp425Gly    | 184/199731=0.001  |
| 178 | KRT1     | NM_006121.4    | c.1693A>G | exonic | 9  | nonsynonymous | p.Ser565Gly    |                   |
| 179 | NIPAL4   | NM_001099287.1 | c.730G>T  | exonic | 5  | nonsynonymous | p.Val244Phe    | 170/254010=0.001  |
| 179 | SLC27A4  | NM_005094.4    | c.1788C>G | exonic | 13 | nonsynonymous | p.Phe596Leu    | 3/246250=0        |
| 179 | TGM1     | NM_000359.3    | c.550C>T  | exonic | 4  | nonsynonymous | p.Pro184Ser    | 183/277094=0.001  |
| 180 | ALOX12B  | NM_0011139.3   | c.526G>A  | exonic | 4  | nonsynonymous | p.Glu176Lys    | 92/276916=0       |
| 180 | ALOXE3   | NM_001165960.1 | c.1843C>T | exonic | 12 | nonsynonymous | p.His615Tyr    |                   |
| 180 | GJB4     | NM_153212.3    | c.314A>G  | exonic | 2  | nonsynonymous | p.His105Arg    | 10/277130=0       |
| 181 | ALOX12B  | NM_0011139.3   | c.526G>A  | exonic | 4  | nonsynonymous | p.Glu176Lys    | 92/276916=0       |
| 181 | CLDN1    | NM_021101.5    | c.136A>T  | exonic | 1  | nonsynonymous | p.Met46Leu     | 15/246242=0       |
| 182 | CLDN1    | NM_021101.5    | c.136A>T  | exonic | 1  | nonsynonymous | p.Met46Leu     | 15/246242=0       |
| 183 | LIPN     | NM_001102469.1 | c.633T>G  | exonic | 5  | nonsynonymous | p.Ile211Met    | 12/275930=0       |
| 184 | ABCA12   | NM_173076.3    | c.539T>C  | exonic | 6  | nonsynonymous | p.Ile180Thr    | 3/245112=0        |
| 184 | GJB2     | NM_004004.6    | c.101T>C  | exonic | 2  | nonsynonymous | p.Met34Thr     | 2487/276420=0.009 |
| 184 | SUMF1    | NM_182760.4    | c.131G>A  | exonic | 1  | nonsynonymous | p.Gly44Glu     |                   |
| 185 | GJB2     | NM_004004.6    | c.35delG  | exonic | 2  | frameshift    | p.Gly12Valfs*2 | 1721/275002=0.006 |
| 186 | ST14     | NM_021978.4    | c.145A>T  | exonic | 2  | stopgain      | p.Lys49*       |                   |
| 187 | TGM1     | NM_000359.3    | c.550C>T  | exonic | 4  | nonsynonymous | p.Pro184Ser    | 183/277094=0.001  |
| 188 | ABCA12   | NM_173076.3    | c.485C>T  | exonic | 5  | nonsynonymous | p.Ala162Val    | 384/276512=0.001  |
| 189 | TGM1     | NM_000359.3    | c.208G>T  | exonic | 2  | nonsynonymous | p.Gly70Cys     |                   |
| 190 | ALOXE3   | NM_001165960.1 | c.2102C>A | exonic | 14 | nonsynonymous | p.Thr701Asn    | 102/276992=0      |
| 190 | ALOXE3   | NM_001165960.1 | c.2404C>T | exonic | 16 | nonsynonymous | p.Arg802Trp    | 239/277182=0.001  |
| 190 | CYP4F22  | NM_173483.4    | c.463C>T  | exonic | 6  | nonsynonymous | p.His155Tyr    | 121/277112=0      |
| 190 | NIPAL4   | NM_001099287.1 | c.397G>A  | exonic | 2  | nonsynonymous | p.Gly133Ser    | 9/277110=0        |
| 191 | ABCA12   | NM_173076.3    | c.501G>C  | exonic | 5  | nonsynonymous | p.Leu167Phe    |                   |
| 192 | KRT2     | NM_000423.3    | c.767A>G  | exonic | 2  | nonsynonymous | p.Asn256Ser    | 110/277226=0      |
| 192 | NIPAL4   | NM_001099287.1 | c.730G>T  | exonic | 5  | nonsynonymous | p.Val244Phe    | 170/254010=0.001  |
| 192 | SERPINB7 | NM_003784.4    | c.715G>A  | exonic | 7  | nonsynonymous | p.Val239Ile    | 20/276514=0       |
| 192 | SPINK5   | NM_001127698.2 | c.1451G>A | exonic | 16 | nonsynonymous | p.Arg484Lys    | 343/276350=0.001  |
| 193 | ALOXE3   | NM_001165960.1 | c.2510T>C | exonic | 16 | nonsynonymous | p.Ile837Thr    | 333/277202=0.001  |
| 193 | CERS3    | NM_001290341.2 | c.914A>G  | exonic | 13 | nonsynonymous | p.His305Arg    | 3292/264968=0.012 |
| 193 | NIPAL4   | NM_001099287.1 | c.397G>A  | exonic | 2  | nonsynonymous | p.Gly133Ser    | 9/277110=0        |
| 193 | ST14     | NM_021978.4    | c.508G>A  | exonic | 5  | nonsynonymous | p.Glu170Lys    | 521/276770=0.002  |

|     |         |                |             |          |    |               |                |                   |
|-----|---------|----------------|-------------|----------|----|---------------|----------------|-------------------|
| 194 | ALOXE3  | NM_001165960.1 | c.2510T>C   | exonic   | 16 | nonsynonymous | p.Ile837Thr    | 333/277202=0.001  |
| 194 | CAST    | NM_001750.7    | c.1283C>T   | exonic   | 17 | nonsynonymous | p.Thr428Met    | 909/277064=0.003  |
| 194 | CYP4F22 | NM_173483.4    | c.463C>T    | exonic   | 6  | nonsynonymous | p.His155Tyr    | 121/277112=0      |
| 194 | ST14    | NM_021978.4    | c.2406+4G>C | intronic | 18 |               |                | 193/212654=0.001  |
| 195 | ABCA12  | NM_173076.3    | c.485C>T    | exonic   | 5  | nonsynonymous | p.Ala162Val    | 384/276512=0.001  |
| 195 | SULT2B1 | NM_004605.2    | c.107T>C    | exonic   | 1  | nonsynonymous | p.Leu36Ser     | 1287/274634=0.005 |
| 196 | GJB3    | NM_024009.3    | c.659A>T    | exonic   | 2  | nonsynonymous | p.Lys220Met    | 1/246042=0        |
| 197 | NIPAL4  | NM_001099287.1 | c.176C>A    | exonic   | 1  | nonsynonymous | p.Ala59Asp     |                   |
| 198 | GJB2    | NM_004004.6    | c.35delG    | exonic   | 2  | frameshift    | p.Gly12Valfs*2 | 1721/275002=0.006 |
| 198 | SLC27A4 | NM_005094.4    | c.742G>A    | exonic   | 5  | nonsynonymous | p.Gly248Ser    |                   |
| 199 | ALOXE3  | NM_001165960.1 | c.2510T>C   | exonic   | 16 | nonsynonymous | p.Ile837Thr    | 333/277202=0.001  |
| 199 | CYP4F22 | NM_173483.4    | c.851G>A    | exonic   | 8  | nonsynonymous | p.Arg284Gln    | 9/276864=0        |
| 200 | ABCA12  | NM_173076.3    | c.1141G>C   | exonic   | 10 | nonsynonymous | p.Val381Leu    | 239/277242=0.001  |
| 201 | ALOXE3  | NM_001165960.1 | c.2510T>C   | exonic   | 16 | nonsynonymous | p.Ile837Thr    | 333/277202=0.001  |
| 201 | GJB4    | NM_153212.3    | c.389C>T    | exonic   | 2  | nonsynonymous | p.Thr130Met    | 30/277058=0       |
| 202 | GJB2    | NM_004004.6    | c.35delG    | exonic   | 2  | frameshift    | p.Gly12Valfs*2 | 1721/275002=0.006 |
| 202 | SULT2B1 | NM_004605.2    | c.867G>A    | exonic   | 6  | nonsynonymous | p.Met289Ile    | 270/262312=0.001  |
| 203 | VPS33B  | NM_018668.4    | c.1837A>T   | exonic   | 23 | nonsynonymous | p.Ser613Cys    |                   |
| 204 | ALDH3A2 | NM_001031806.1 | c.1270C>T   | exonic   | 8  | nonsynonymous | p.Pro424Ser    | 1205/277210=0.004 |
| 204 | ELOVL4  | NM_022726.4    | c.814G>C    | exonic   | 6  | nonsynonymous | p.Glu272Gln    | 2735/277052=0.01  |
| 204 | GJB2    | NM_004004.6    | c.35delG    | exonic   | 2  | frameshift    | p.Gly12Valfs*2 | 1721/275002=0.006 |
| 204 | NIPAL4  | NM_001099287.1 | c.296T>C    | exonic   | 2  | nonsynonymous | p.Val99Ala     | 783/277214=0.003  |
| 204 | SULT2B1 | NM_004605.2    | c.867G>A    | exonic   | 6  | nonsynonymous | p.Met289Ile    | 270/262312=0.001  |
| 205 | GJB2    | NM_004004.6    | c.35delG    | exonic   | 2  | frameshift    | p.Gly12Valfs*2 | 1721/275002=0.006 |

|         |           |                |               |         |
|---------|-----------|----------------|---------------|---------|
| ABCA12  | c.6593C>T | p.(Thr2198Ile) | VUS           |         |
| ABCA12  | c.6704A>C | p.(Glu2235Ala) | Benign        |         |
| ALOX3   | c.122C>A  | p.(Ala41Asp)   | VUS           |         |
| GJB2    | c.663G>C  | p.Lys221Asn    | VUS           | PP2     |
| GJB4    | c.500A>G  | p.(Glu167Gly)  | VUS           |         |
| KRT1    | c.1724A>G | p.(His575Arg)  | VUS           |         |
| KRT1    | c.1669A>G | p.(Ser557Gly)  | Benign        |         |
| PNPLA1  | c.1464T>A | p.(Tyr488*)    | Benign        |         |
| RIN2    | c.364C>T  | p.(His122Trp)  | VUS           |         |
| RTEL1   | c.2920G>A | p.(Gly974Ser)  | VUS           |         |
| ST14    | c.2146G>C | p.(Glu716Gln)  | VUS           |         |
| SULT2B1 | c.912G>A  | p.(Met304Ile)  | Likely benign |         |
| SUMF1   | c.376A>C  | p.(Met126Leu)  | VUS           |         |
| TGM5    | c.850G>A  | p.(Val284Ile)  | VUS           |         |
| TGM1    | c.1033G>A | p.(Asp345Asn)  | VUS           | Class 3 |
| TGM1    | c.2405A>T | p.(Asp802Val)  | Benign        | Class 1 |

PM2

PM1

PM2

23.8

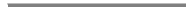

26.6
